# Supplementary material for: Genomic variation and biogeography of Antarctic haloarchaea
Source: PubMed Central journal article supplement (PMC6011602; doi:10.1186/s40168-018-0495-3), 2018-06-20
Supplement: 40168_2018_495_MOESM2_ESM.pdf [file 40168_2018_495_MOESM2_ESM.pdf]

## Additional file 2

### Genomic variation and biogeography of Antarctic haloarchaea

Bernhard Tschitschko, Susanne Erdmann, Matthew Z. DeMaere, Simon Roux, Pratibha Panwar, Michelle A. Allen, Timothy J. Williams, Sarah Brazendale, Alyce M. Hancock, Nicole Shapiro, Emiley A. Eloie-Fadrosh and Ricardo Cavicchioli

#### Supplementary Figures

**Figure S1** Archaellin protein sequence alignment.

**Figure S2** arCOG functional classes of genes present on ACAM34 and R1S1 secondary replicons.

**Figure S3** arCOG functional classes of the genes within HIRs specific to R1S1 and DL1, DL31 and *Hht. litchfieldiae* tADL.

**Figure S4** New HIRs present in R1S1 that are shared with *Hht. litchfieldiae* tADL.

**Figure S5** Genomic islands on primary replicons of Antarctic haloarchaea.

**Figure S6** Metagenome coverage and HCA of selected secondary replicons.

**Figure S7** Contigs assembled from metagenomes mapped to replicons.

**Figure S8** Clustering and scaling of samples.

#### Supplementary Tables

**Table S1** Description of the Rauer Islands and Vestfold Hills hypersaline lakes sampled in this study.

**Table S2** Antarctic lake metagenomes used in this study.

**Table S3** Unique transposases of ACAM34 and R1S1.

**Table S4** Unique protein-coding genes.

**Table S5** Unique sequence duplications and non-coding RNAs on the R1S1 primary replicon.

**Table S6** Regions with low sequence similarity between ACAM34 and R1S1 primary replicons.

**Table S7** New HIRs identified in R1S1.

**Table S8** HIR conserved between *Hrr. lacusprofundi* R1S1 and DL1 that encodes a type I-B CRISPR system.

**Table S9** R1S1 CRISPR spacer matching Hlac-Pro1 in ACAM34.

**Table S10** Presence of 16S rRNA gene sequences for known Antarctic haloarchaeal species in Antarctic hypersaline lakes.

**Table S11** Relative abundance of *Hrr. lacusprofundi* ACAM34, *Hht. litchfieldiae* tADL, DL31 and DL1 in Antarctic lake metagenomes.

**Table S12** Relative abundance of lake taxa assessed from read coverage and taxonomic assignment of contigs assembled from metagenome data.

**Table S13** Genome coverage and percent identity for contigs mapped to replicons of *Hrr. lacusprofundi* R1S1 and ACAM34, *Hht. litchfieldiae* tADL, DL31 and DL1.

#### References



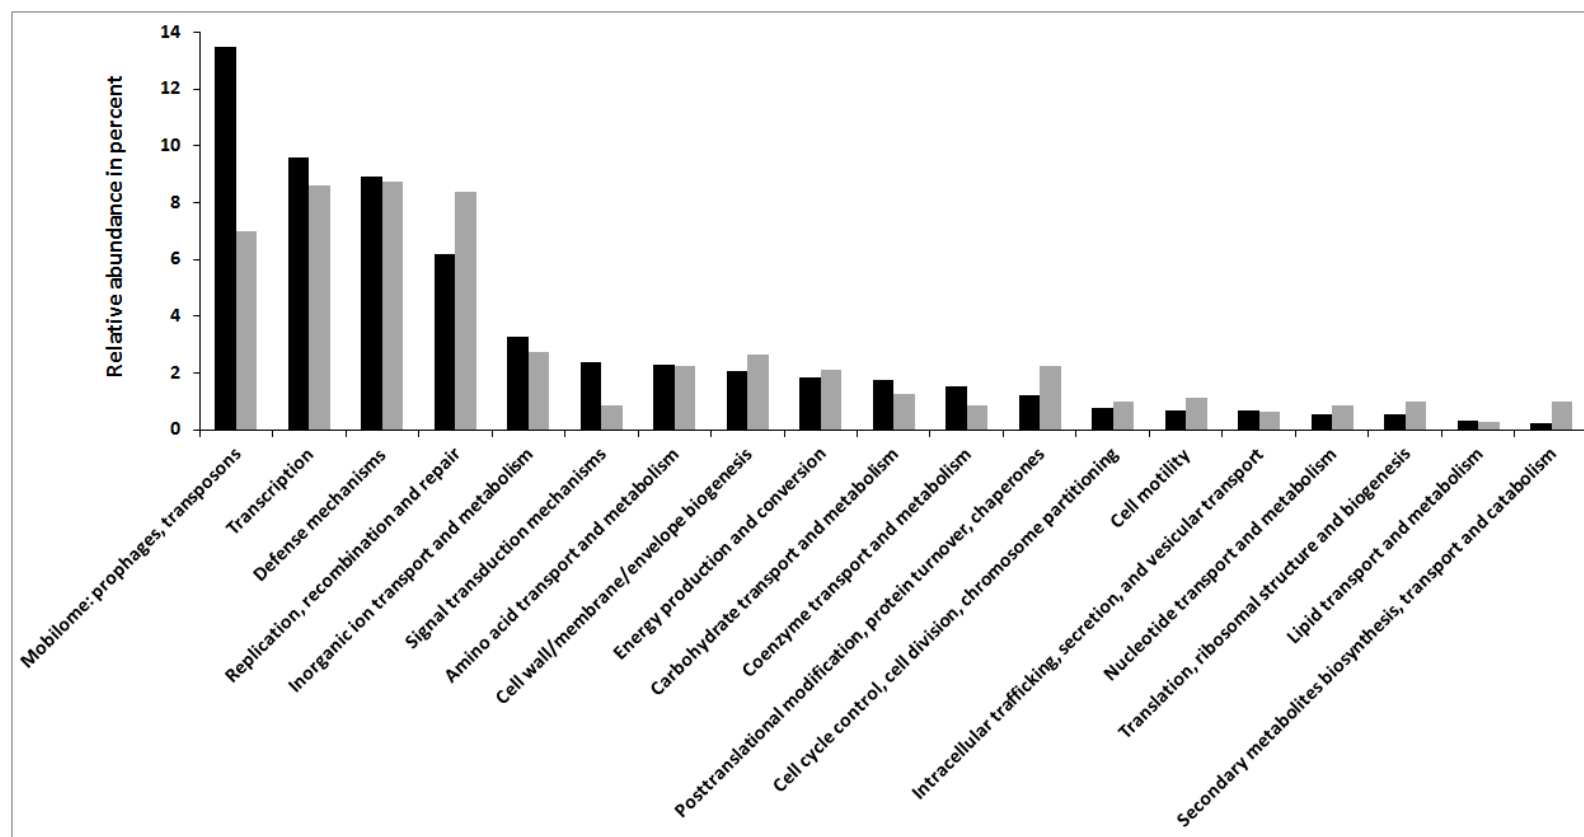

**Figure S2** arCOG functional classes of genes present on ACAM34 and R1S1 secondary replicons. Relative abundance of genes assigned arCOG functional classes for ACAM34 (black) and R1S1 (grey). The representation of arCOG functional classes is broadly similar between the strains. The smaller proportion of genes belonging to the ‘Mobilome: prophages, transposons’ class in R1S1 is likely due to a lack of assembly of reads that match to transposase genes that are present with multiple copies. Not shown are genes assigned into ‘General function prediction only’ (ACAM34, 4% and R1S1, 5%), ‘Function unknown’ (ACAM34, 26; R1S1, 24%), and those not assigned any arCOG class (ACAM34, 12; R1S1, 17%).

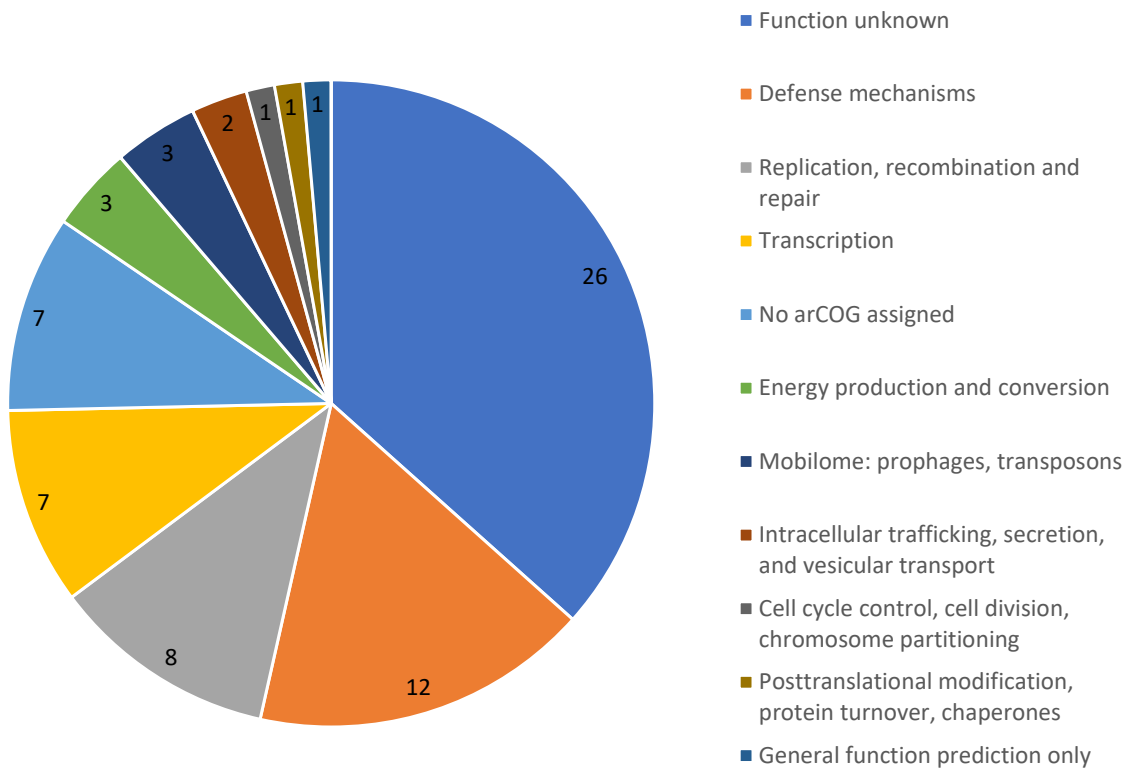

**Figure S3** arCOG functional classes of the genes within HIRs specific to R1S1 and DL1, DL31 and *Hht. litchfieldiae* tADL. The eleven regions (2-14 kb in length) represent 67 kb of HIRs not present in ACAM34.

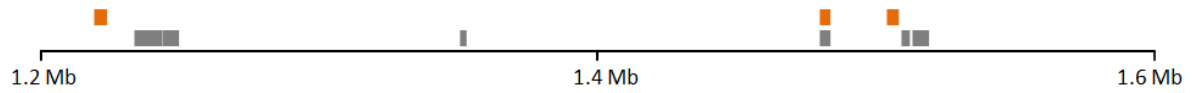

**Figure S4** New HIRs present in R1S1 that are shared with *Hht. litchfieldiae* tADL. The figure shows a region of the *Hht. litchfieldiae* tADL replicon that contains new HIRs shared with R1S1 (orange blocks) that are in close proximity to previously described HIRs (grey blocks) [2].

a)  
Hrr. lacusprofundi strain ACAM34, primary replicon

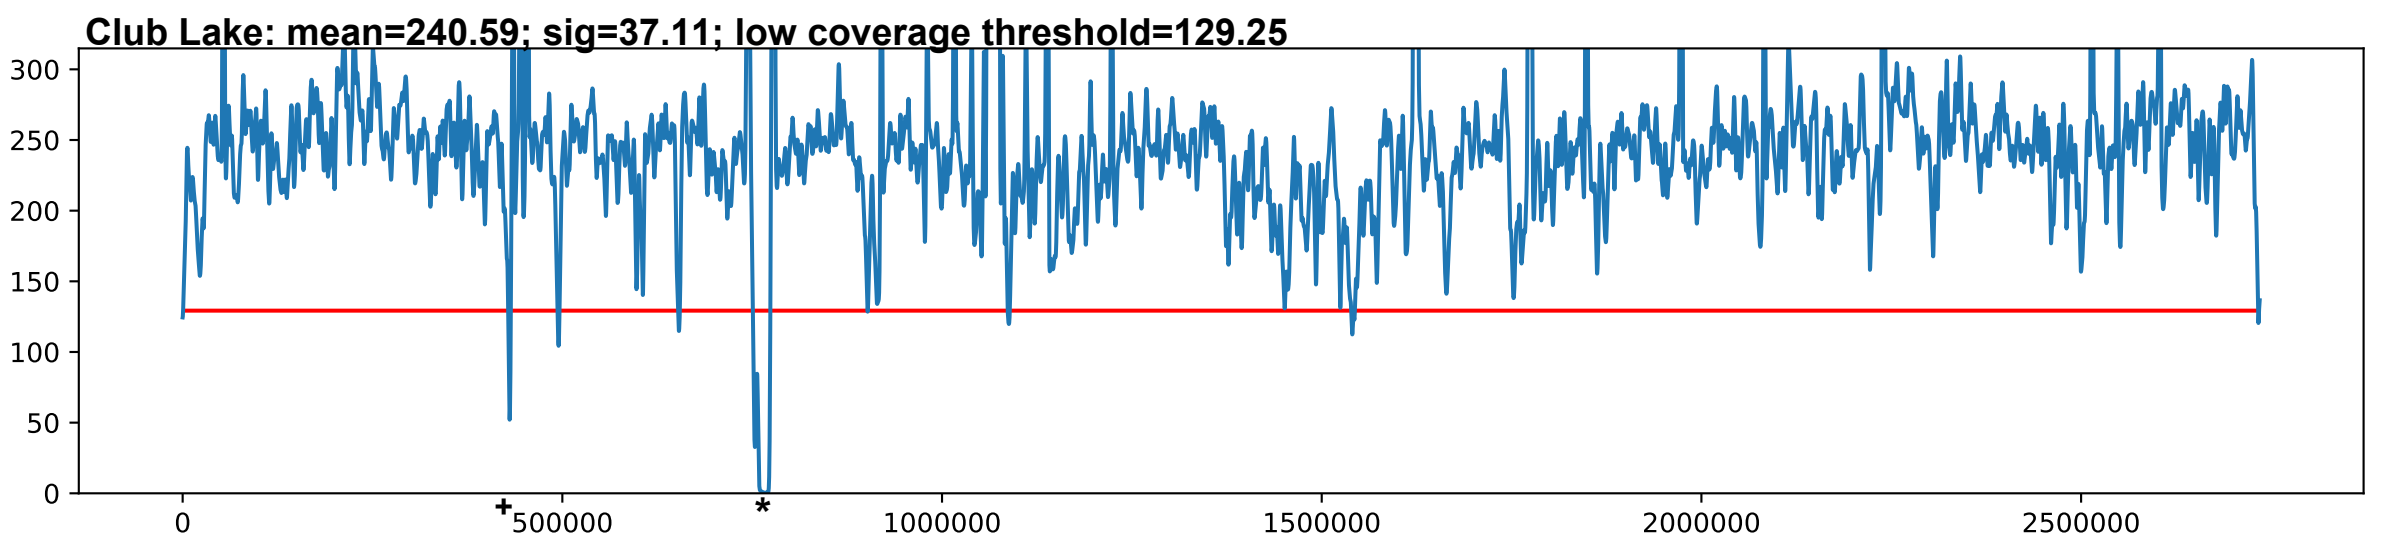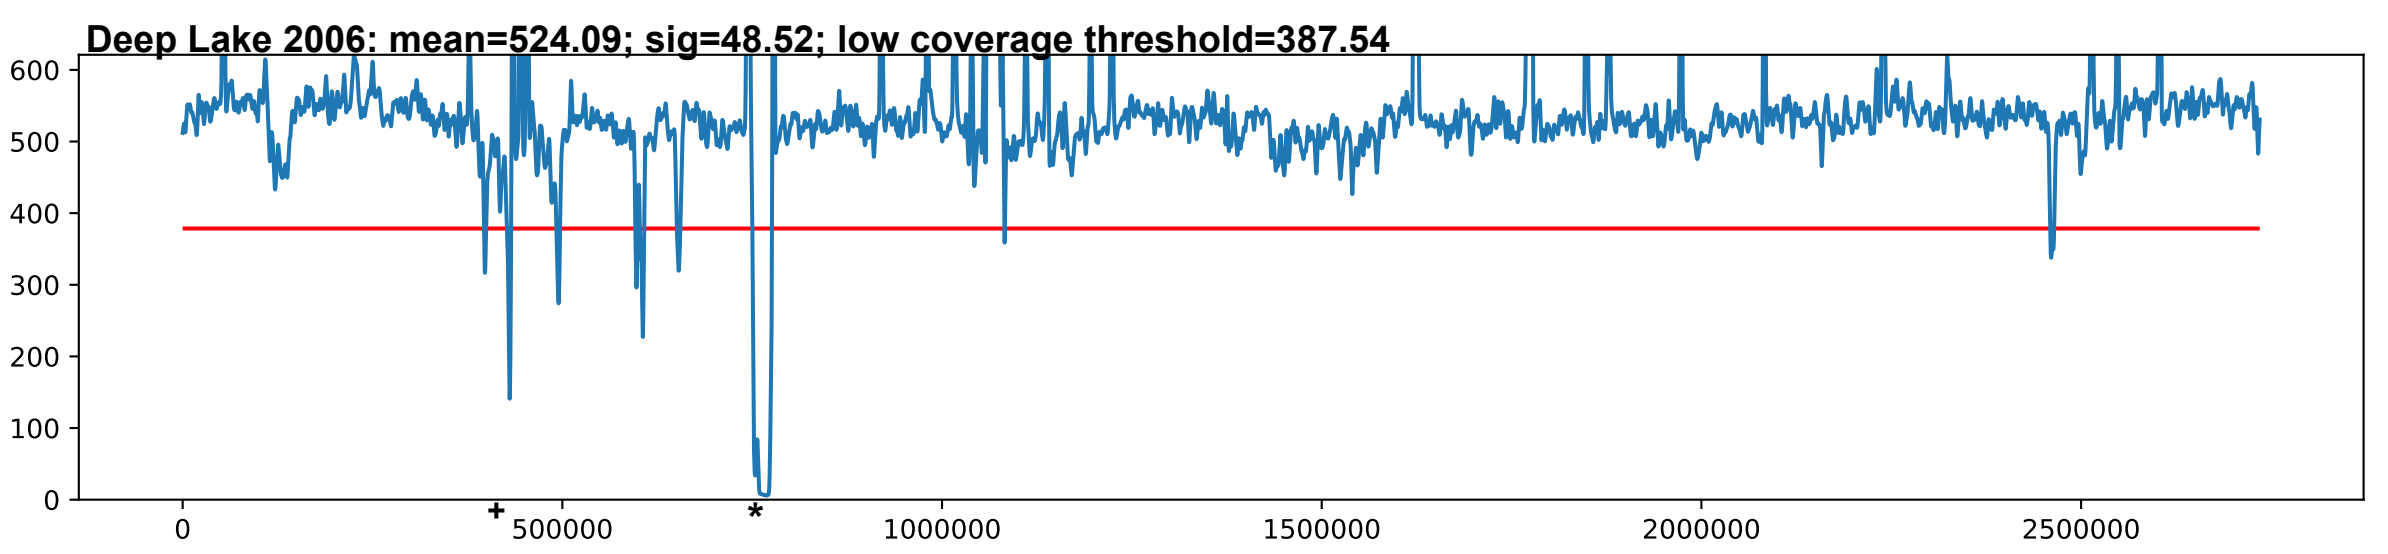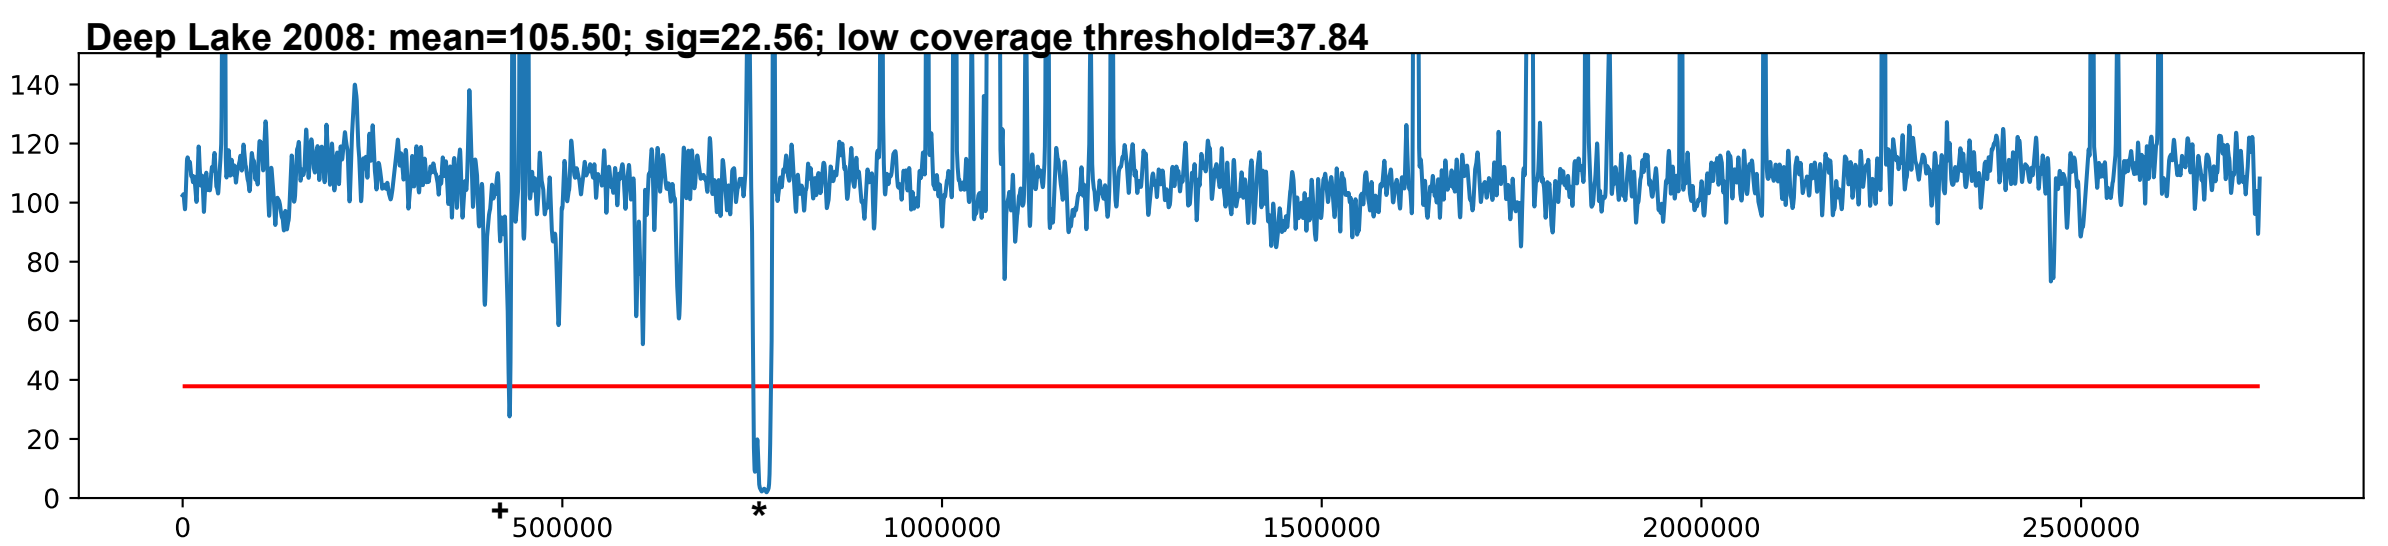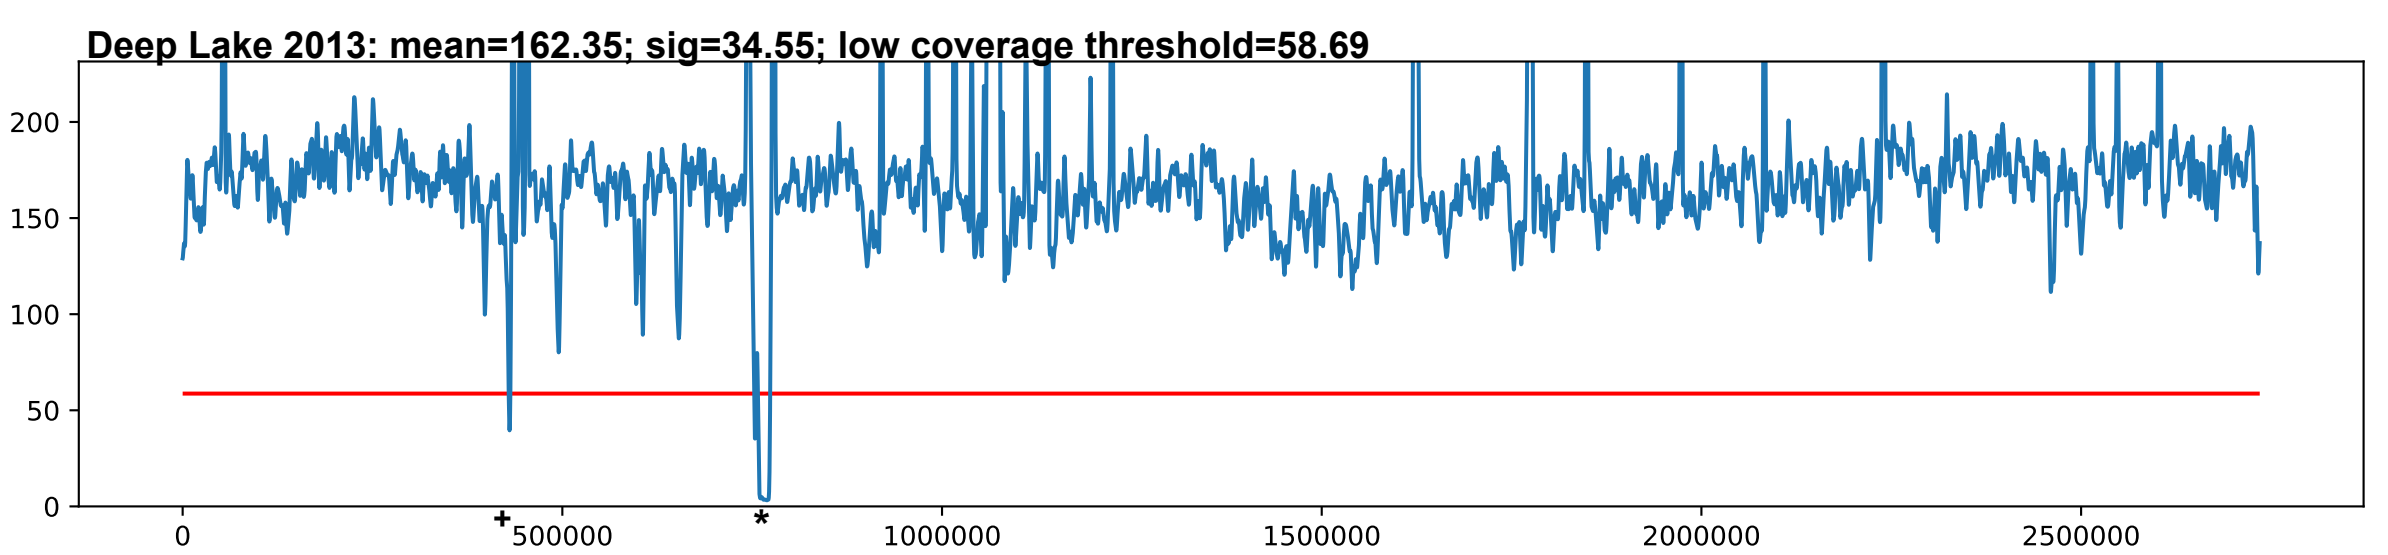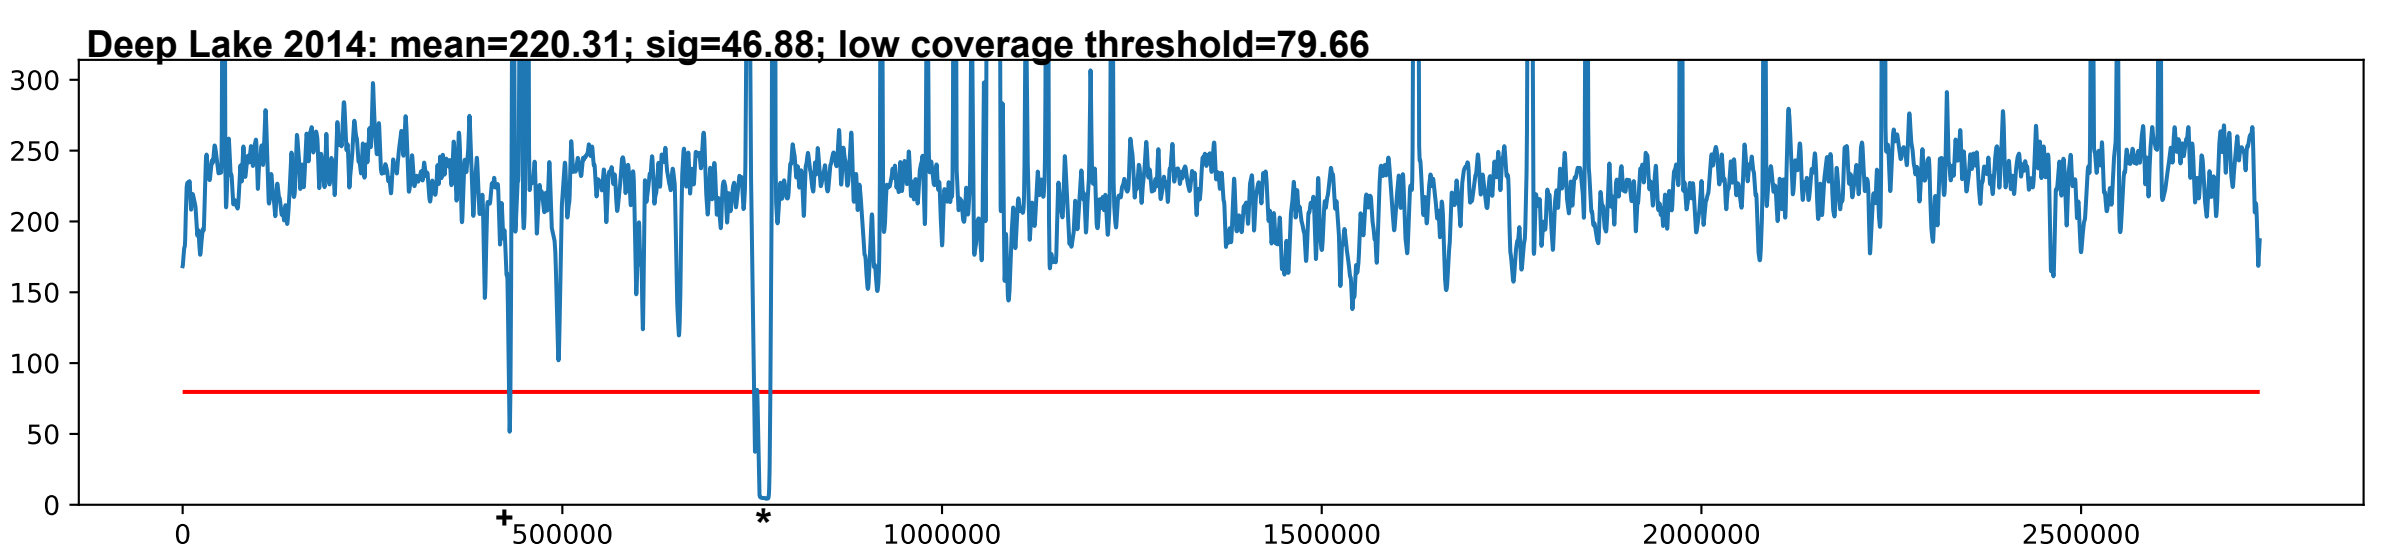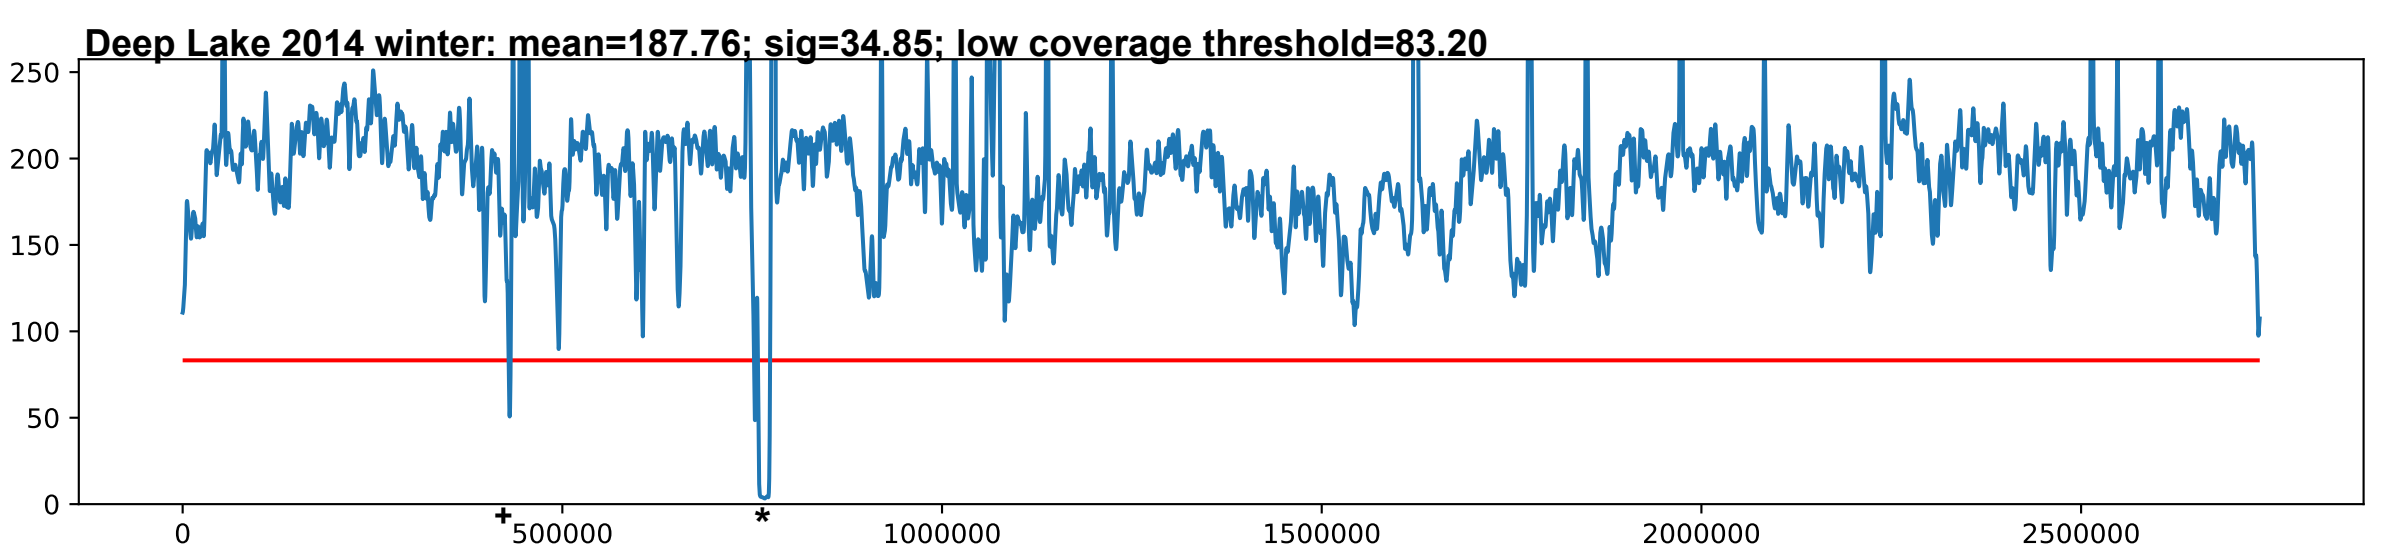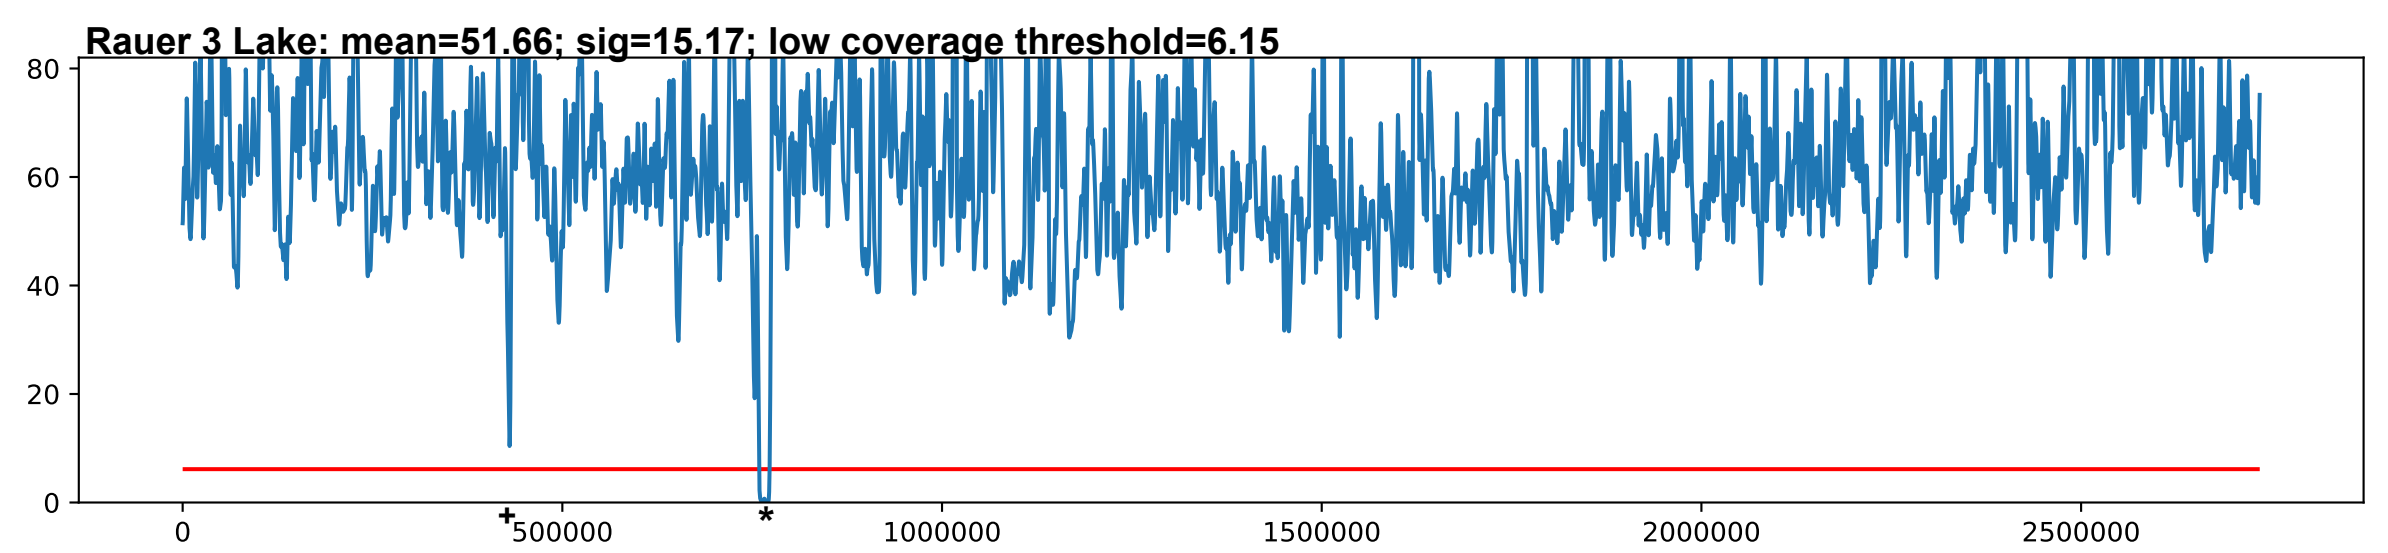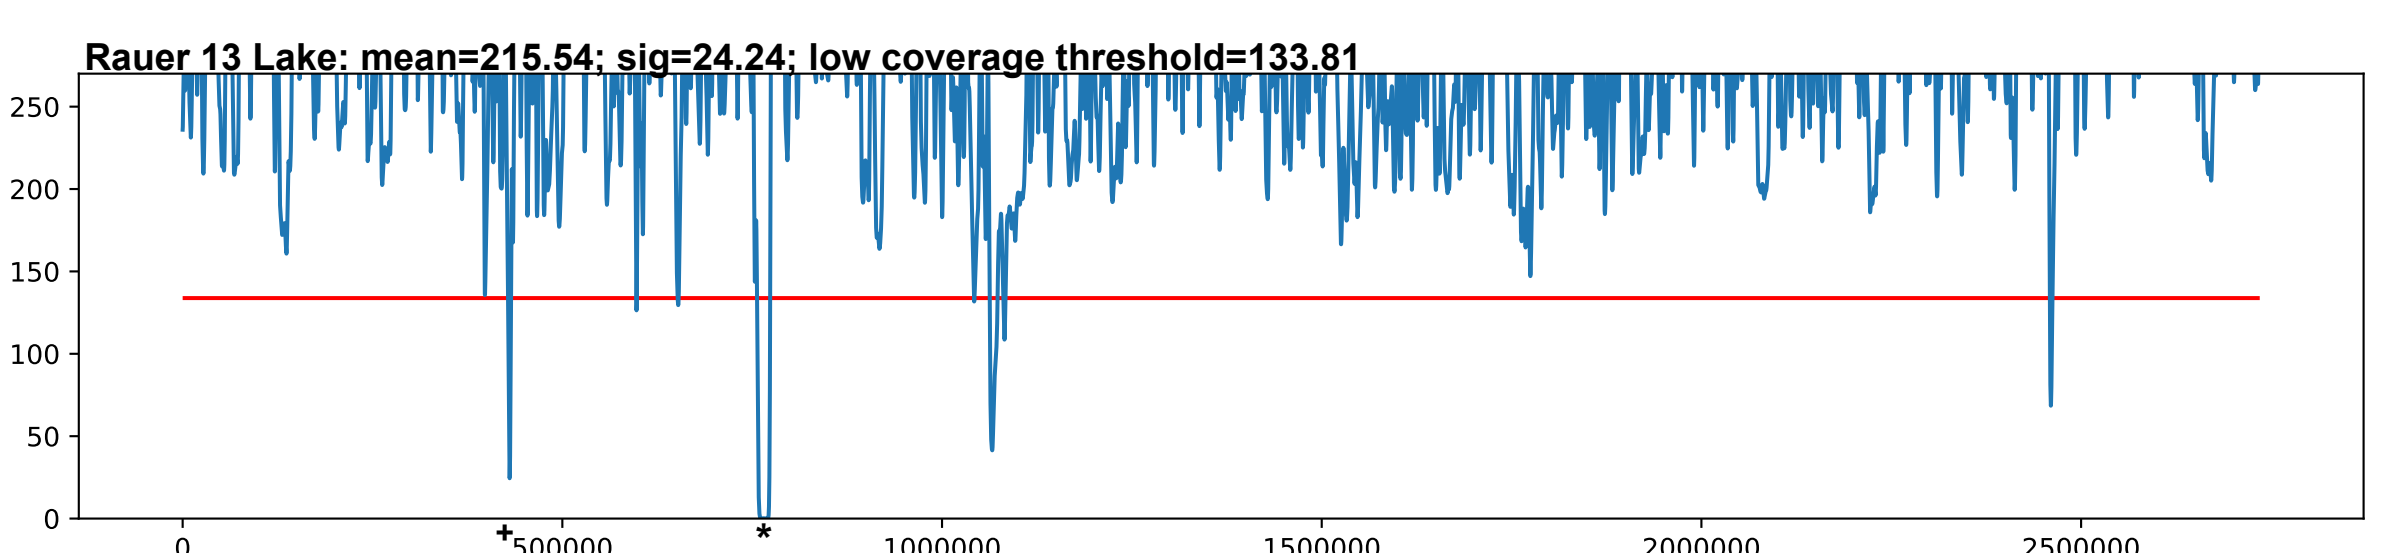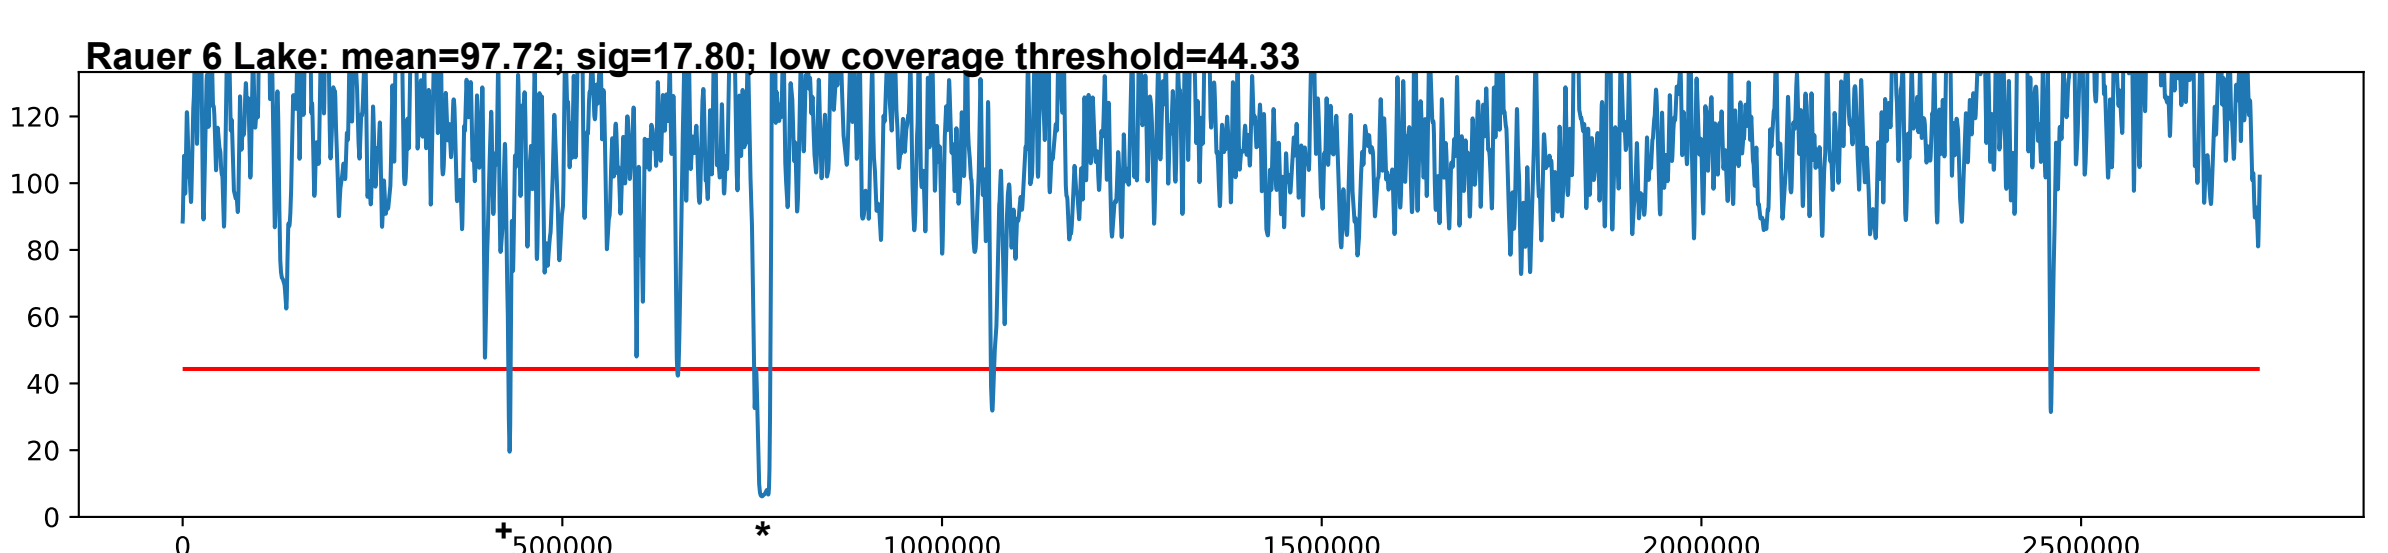



b)  
DL31, primary replicon

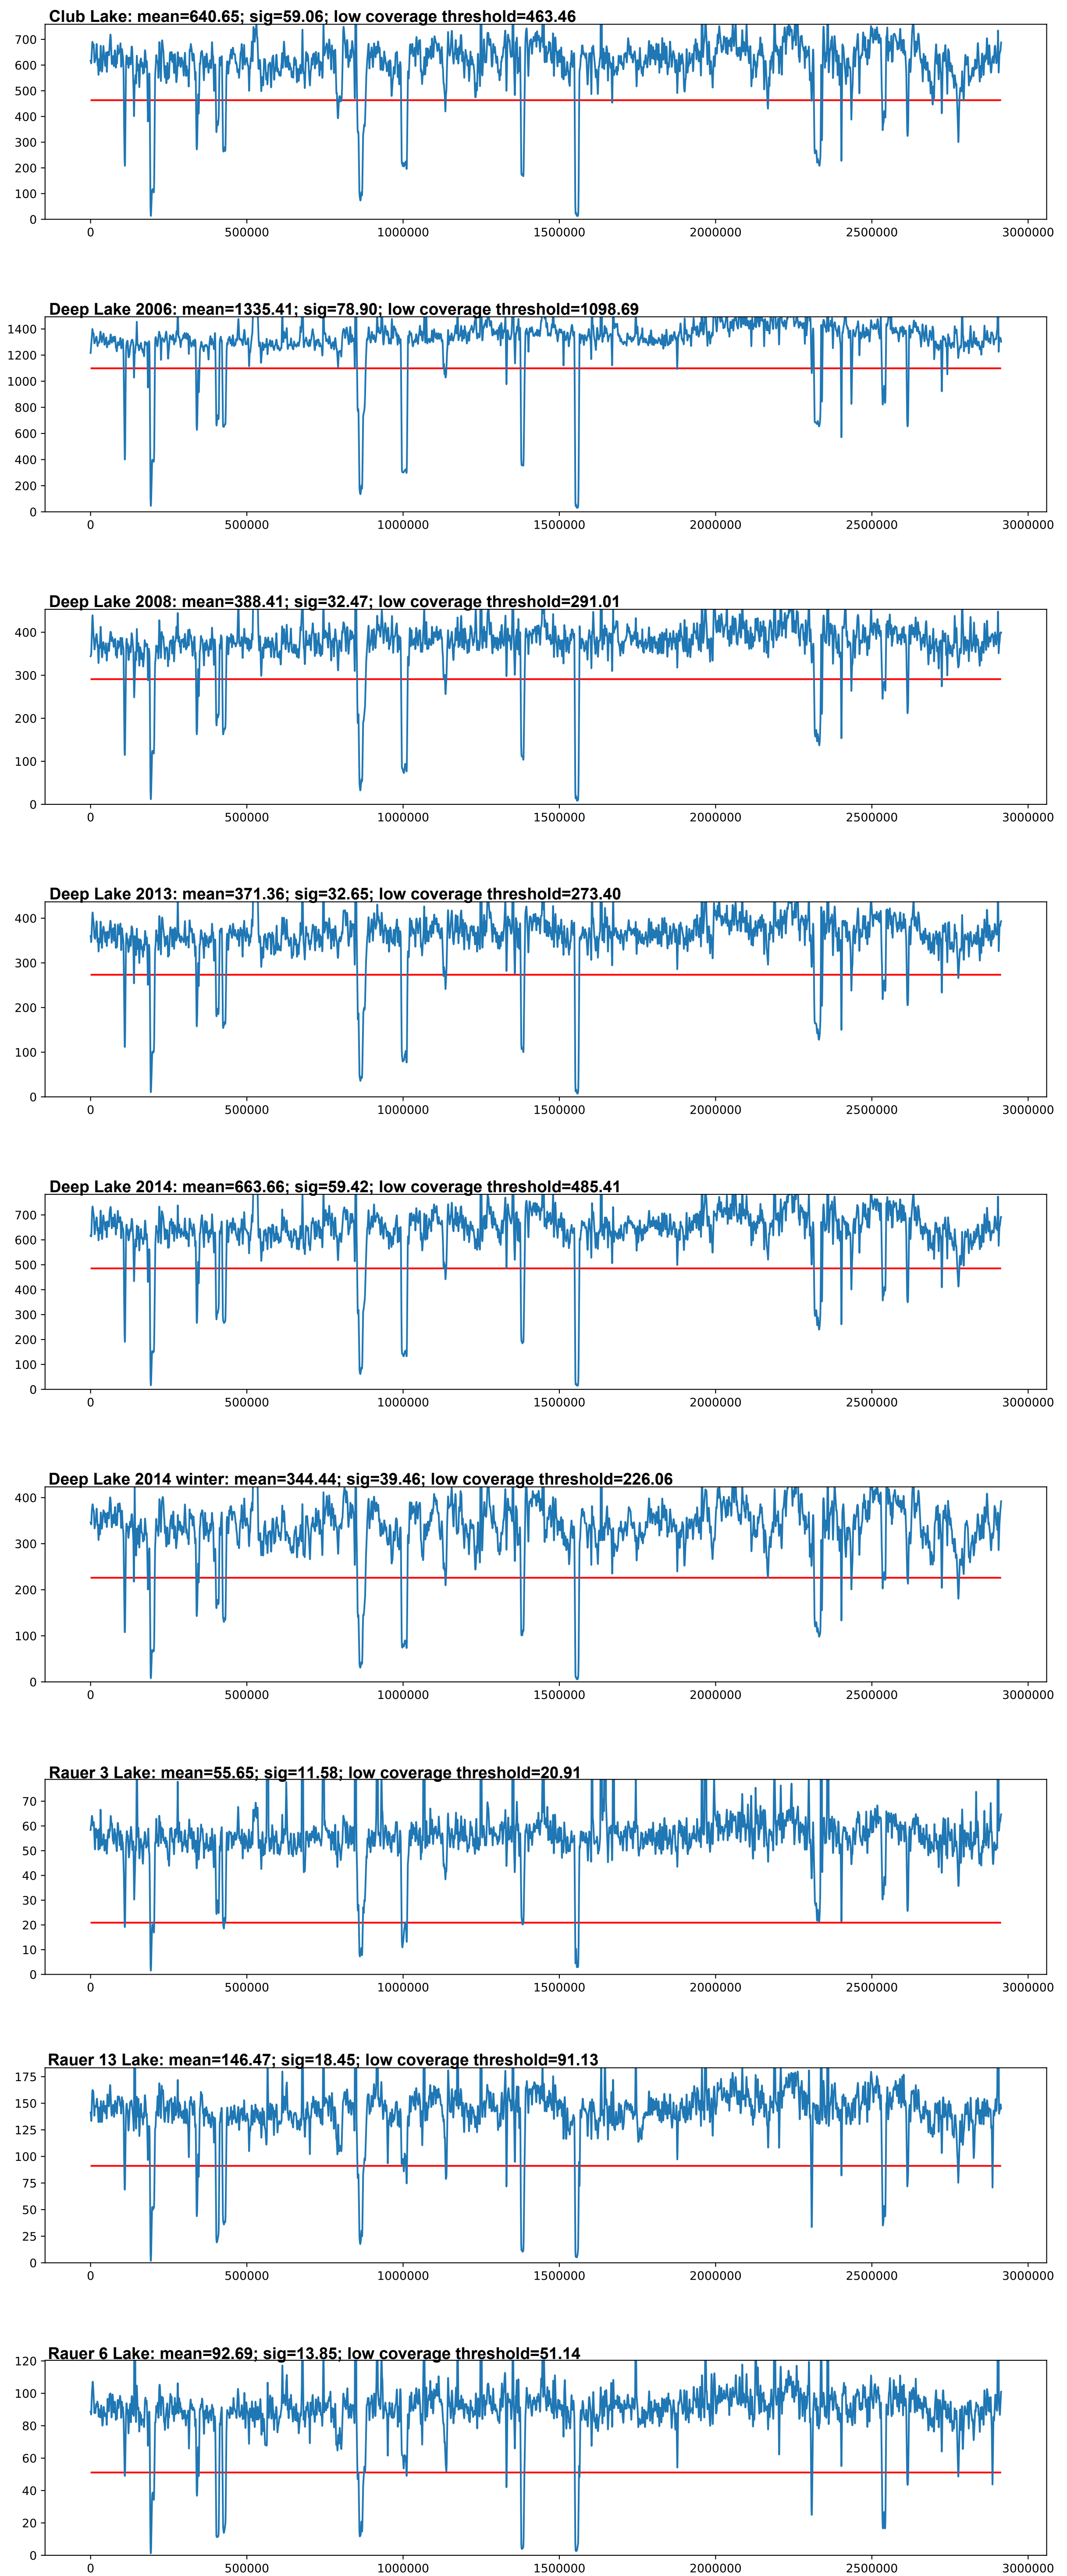

c)

*Hht. litchfieldiae* strain tADL, single replicon

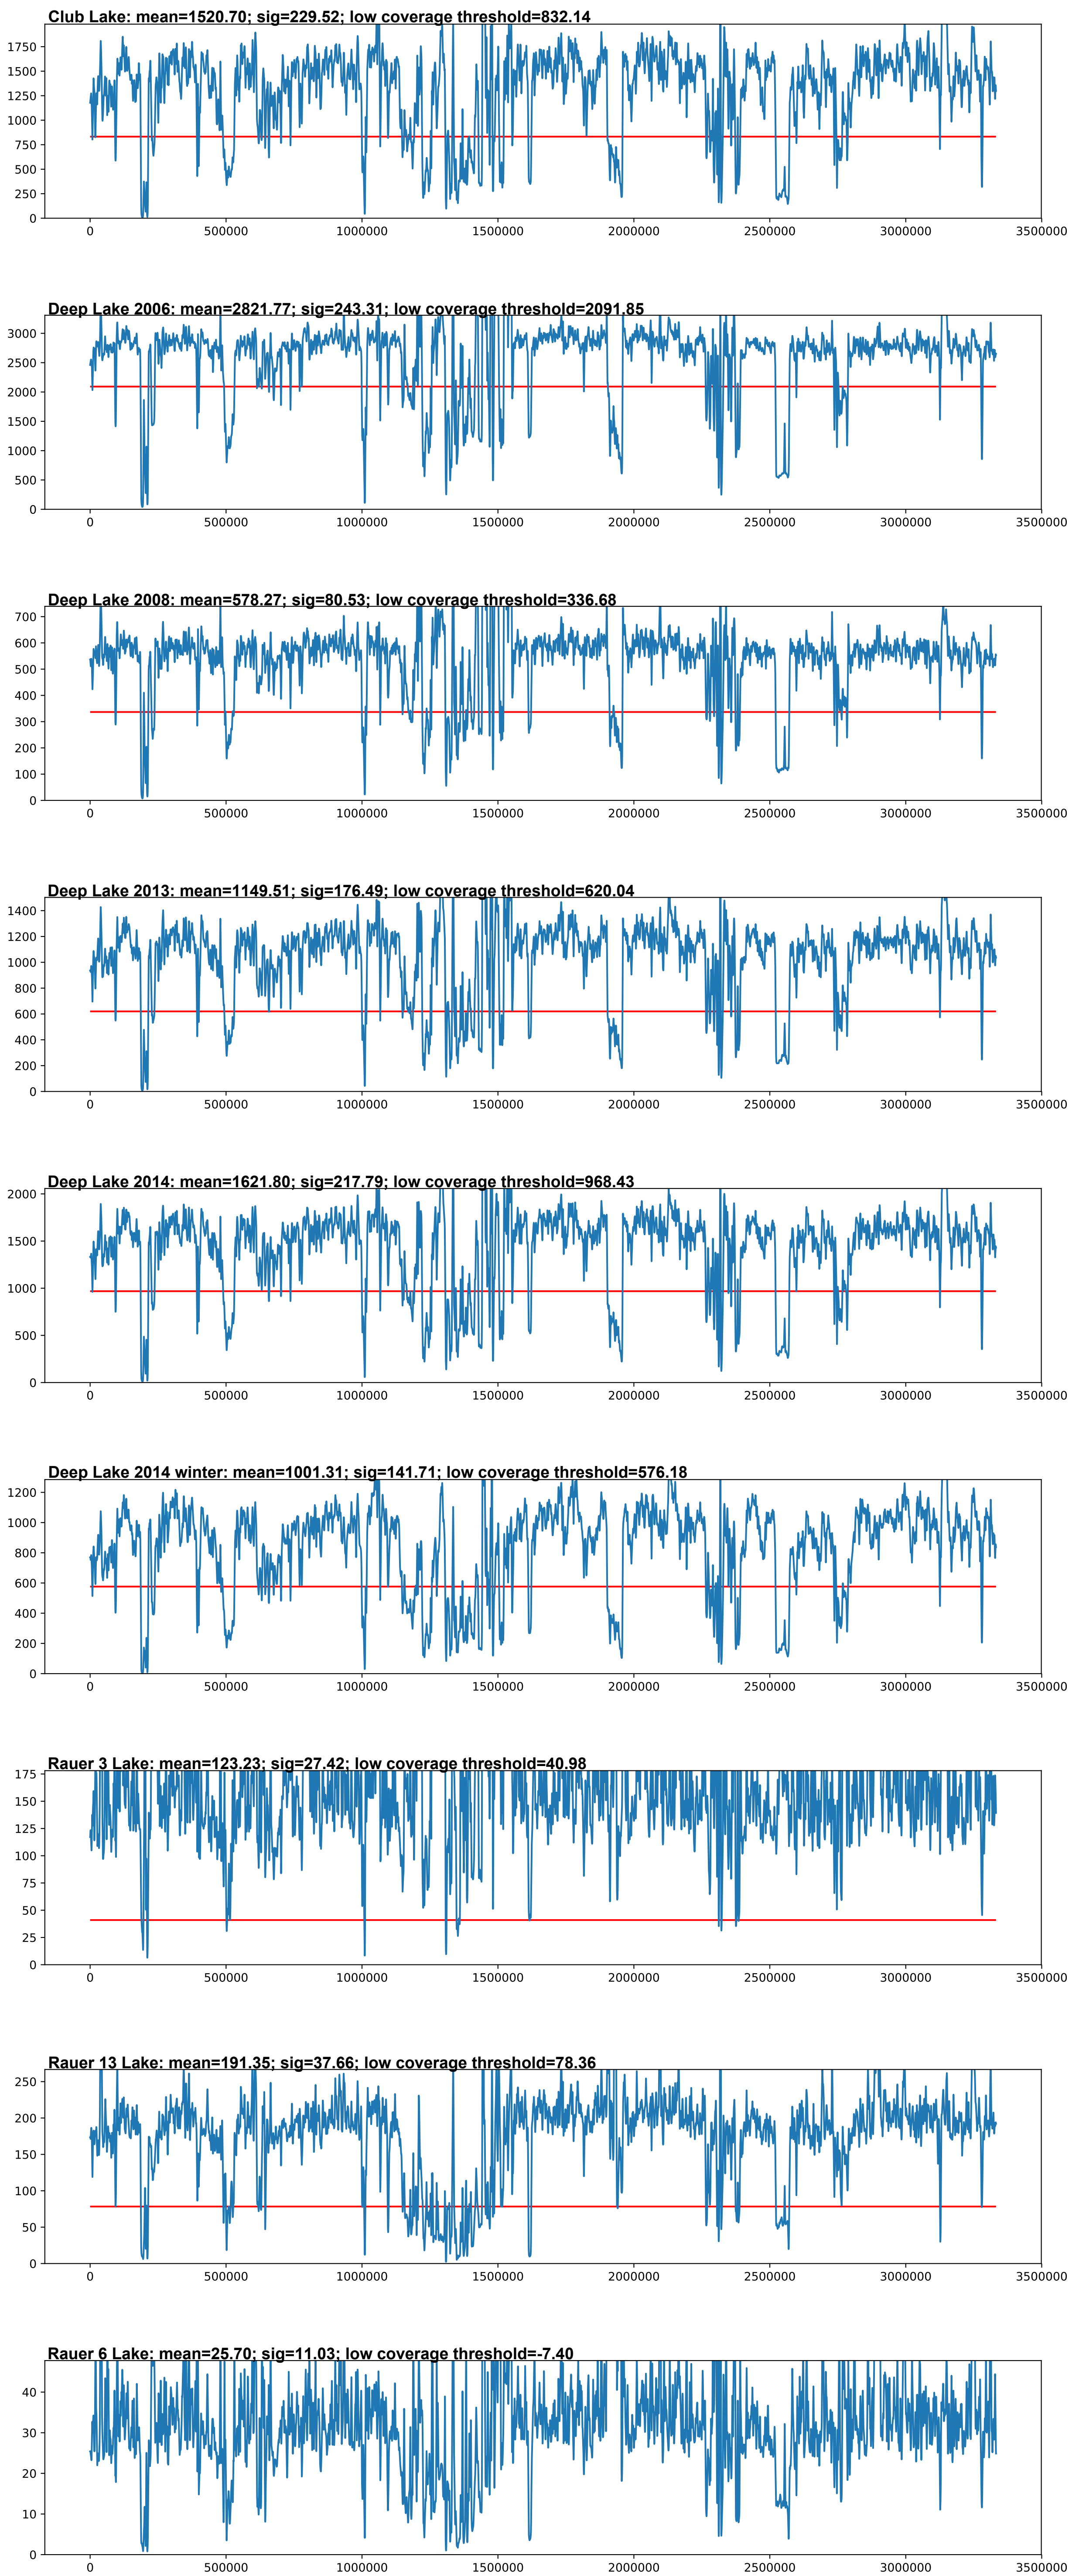



**Figure S5** Genomic islands on primary replicons of Antarctic haloarchaea. Reads from nine pooled metagenomes (Additional file 2: Table S11) were mapped against the primary replicons of *Hrr. lacusprofundi* ACAM34 (**a**), DL31 (**b**) and *Hht. litchfieldiae* tADL (**c**). The plots show the coverage (y-axis) for each primary replicon and metagenome; the red line in each plot shows the coverage threshold (mean minus three standard deviations) that was used to define genomic islands. The primary replicon of *Hrr. lacusprofundi* ACAM34 had the least amount of genomic islands (average of ~31 kb), followed by DL31, and *Hht. litchfieldiae* tADL. Features on genomic islands of the ACAM34 primary replicon are highlighted: provirus Hlac-Pro1 (\*) and S-layer gene (+). DL (Deep Lake).

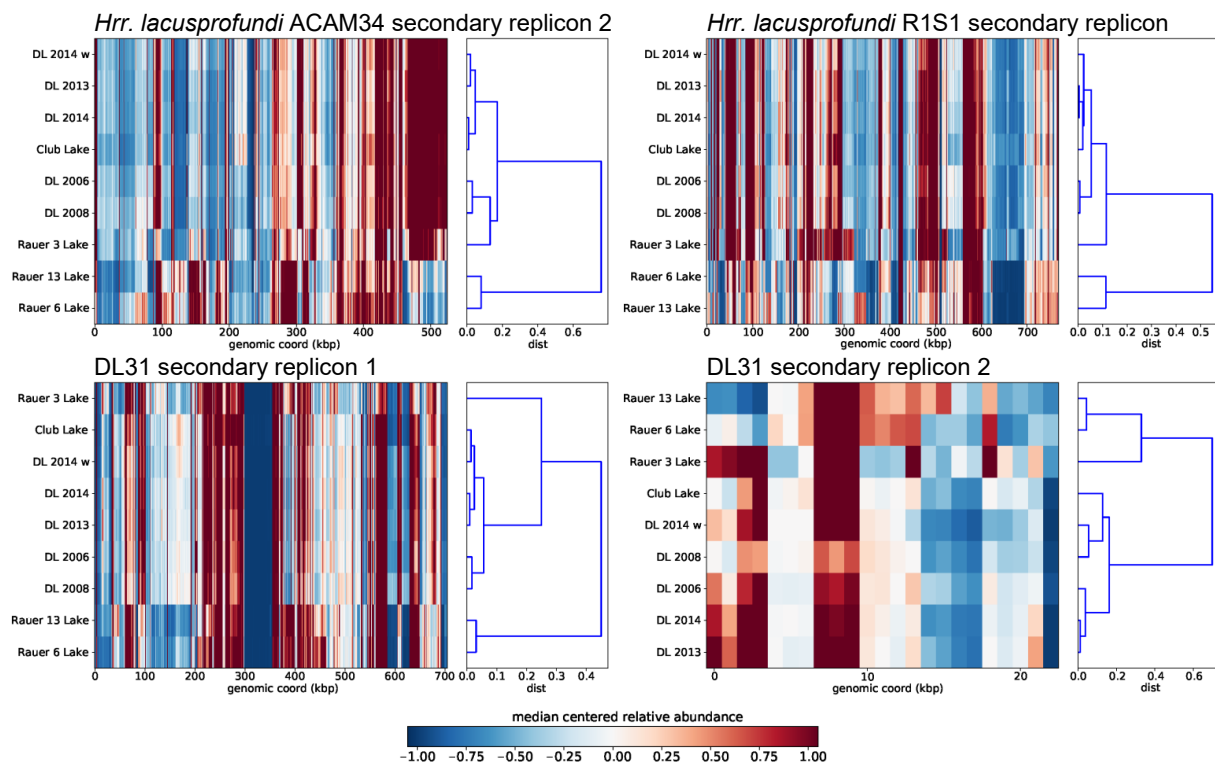

**Figure S6** Metagenome coverage and HCA of selected secondary replicons. The figure shows the metagenome coverage and HCA of secondary replicons not included in Fig. 5. For R1S1, all secondary replicon contigs were concatenated into a single sequence. All metagenomes were from summer except for Deep Lake 2014 winter (w). DL (Deep Lake).

a

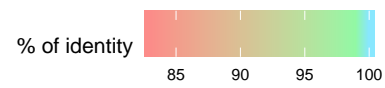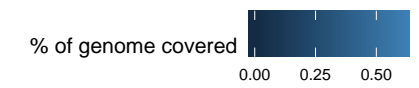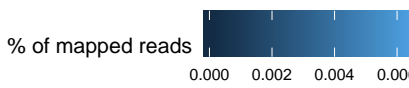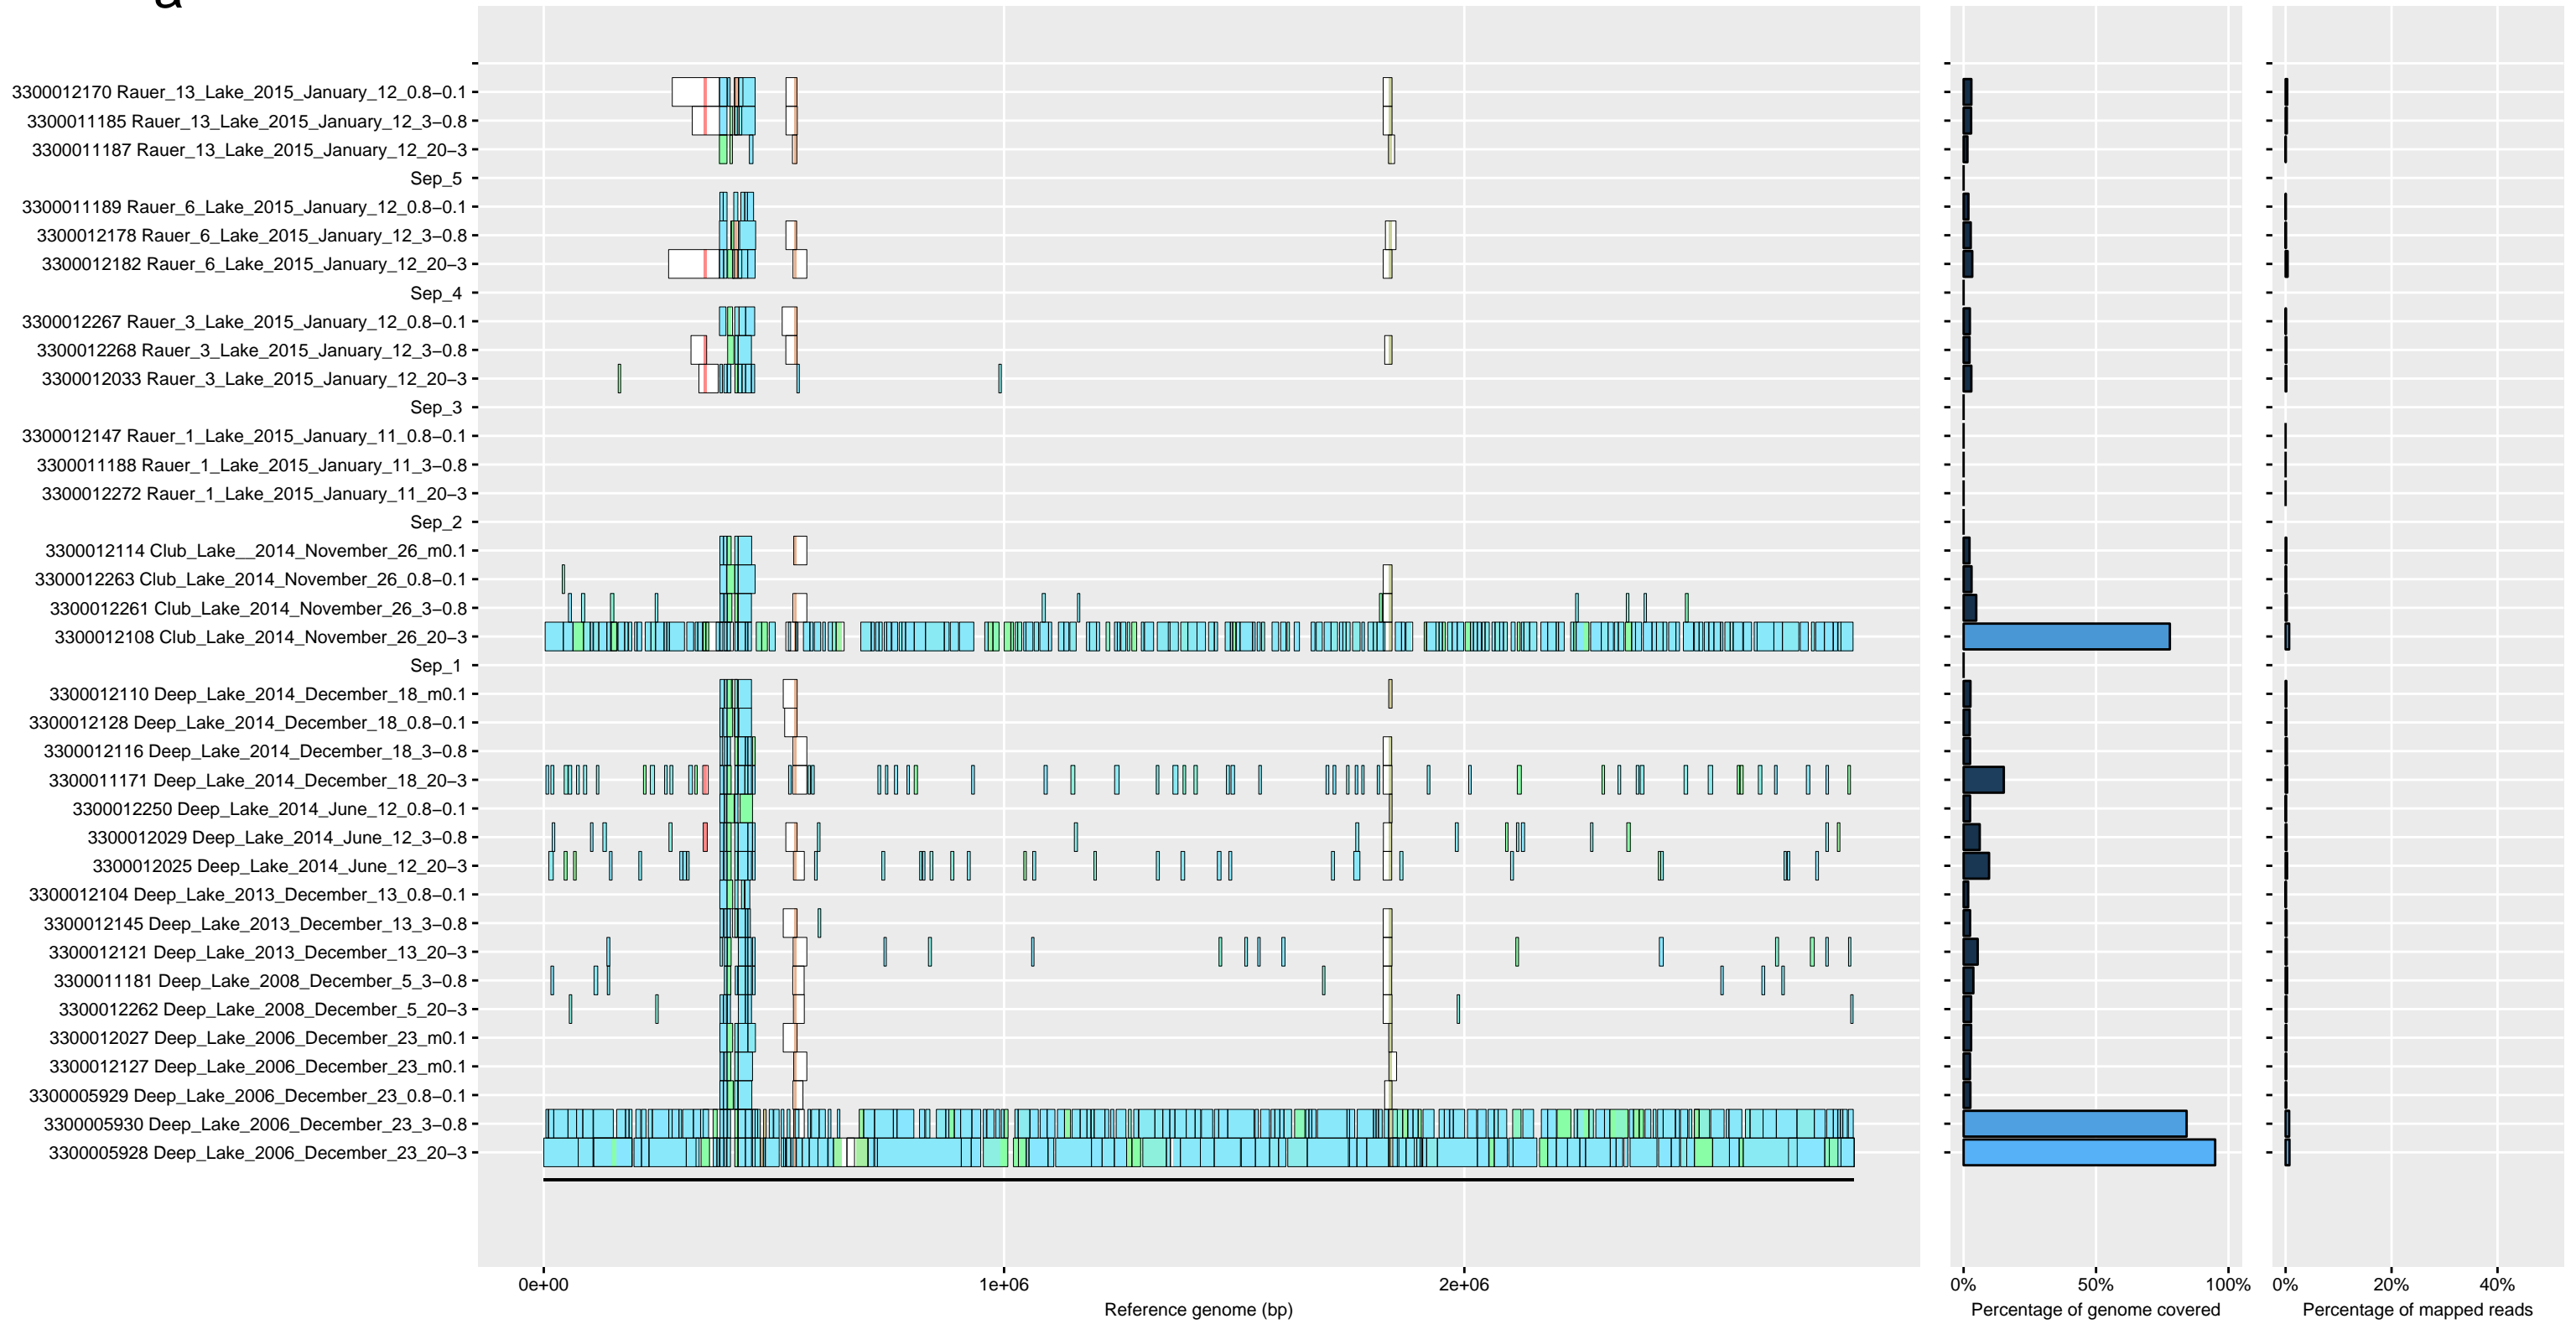

b

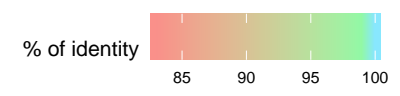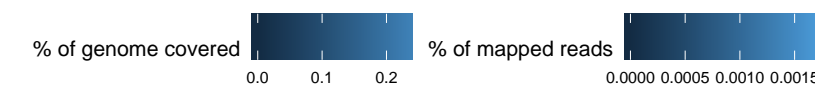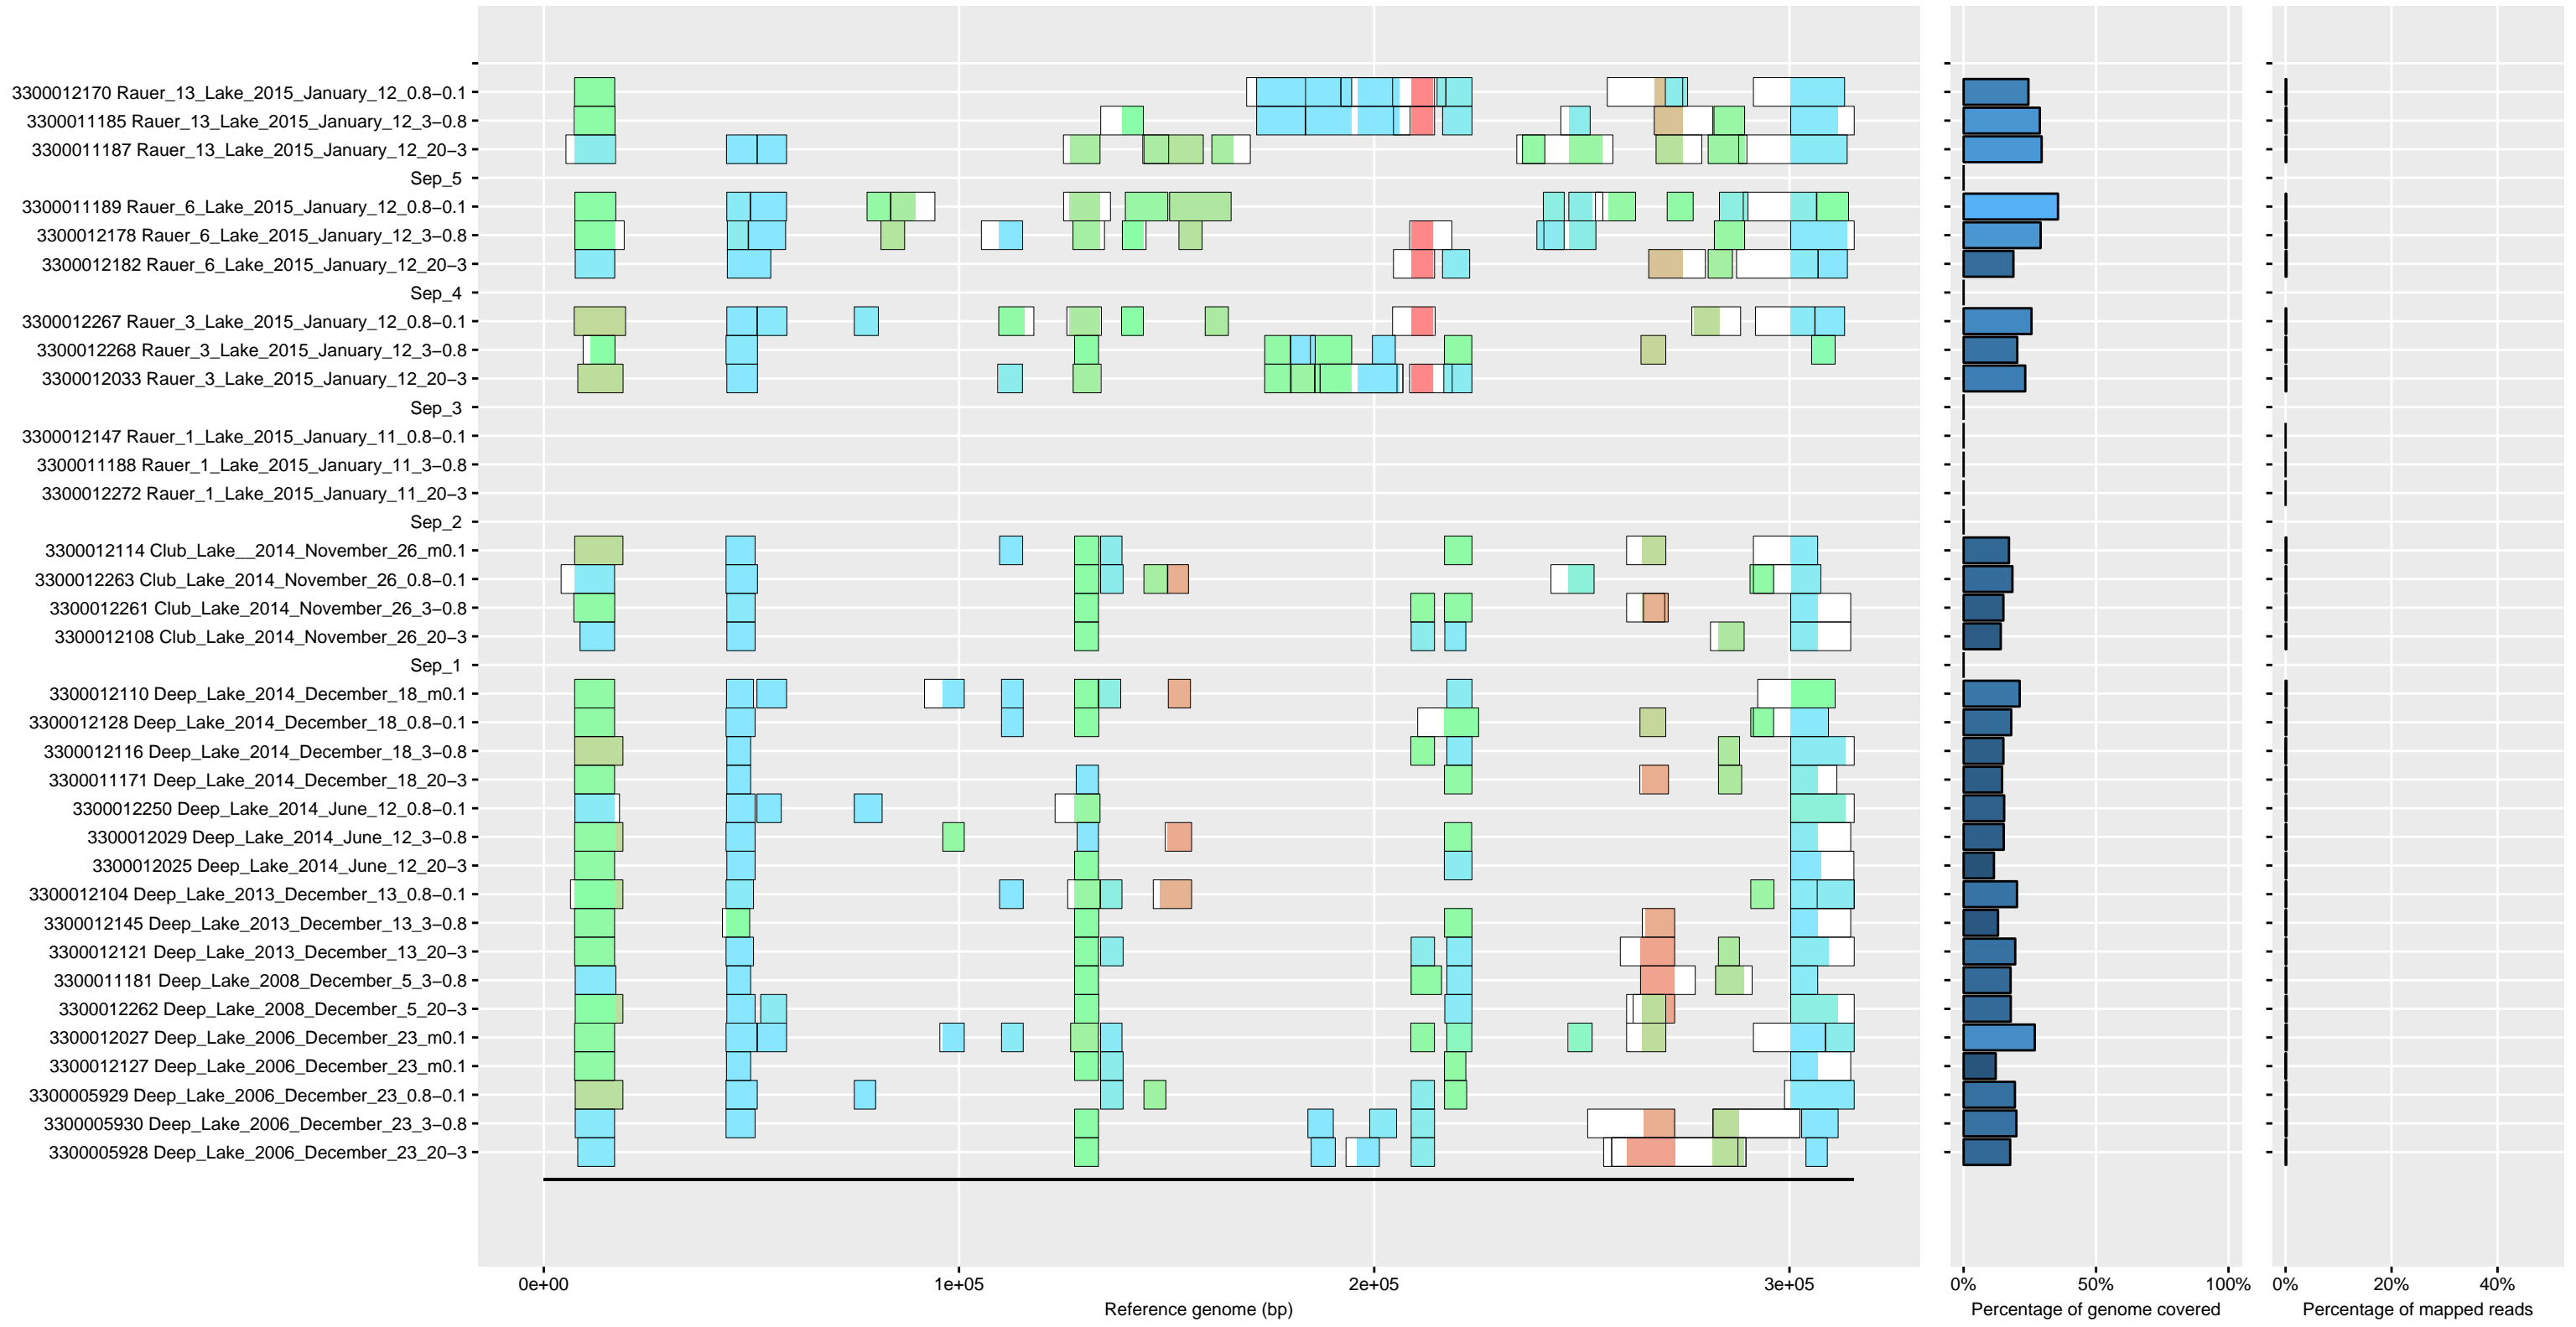



C

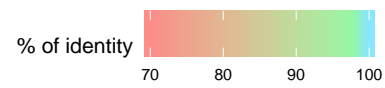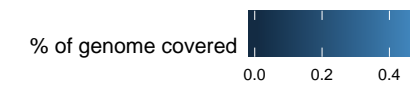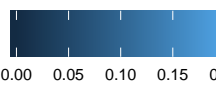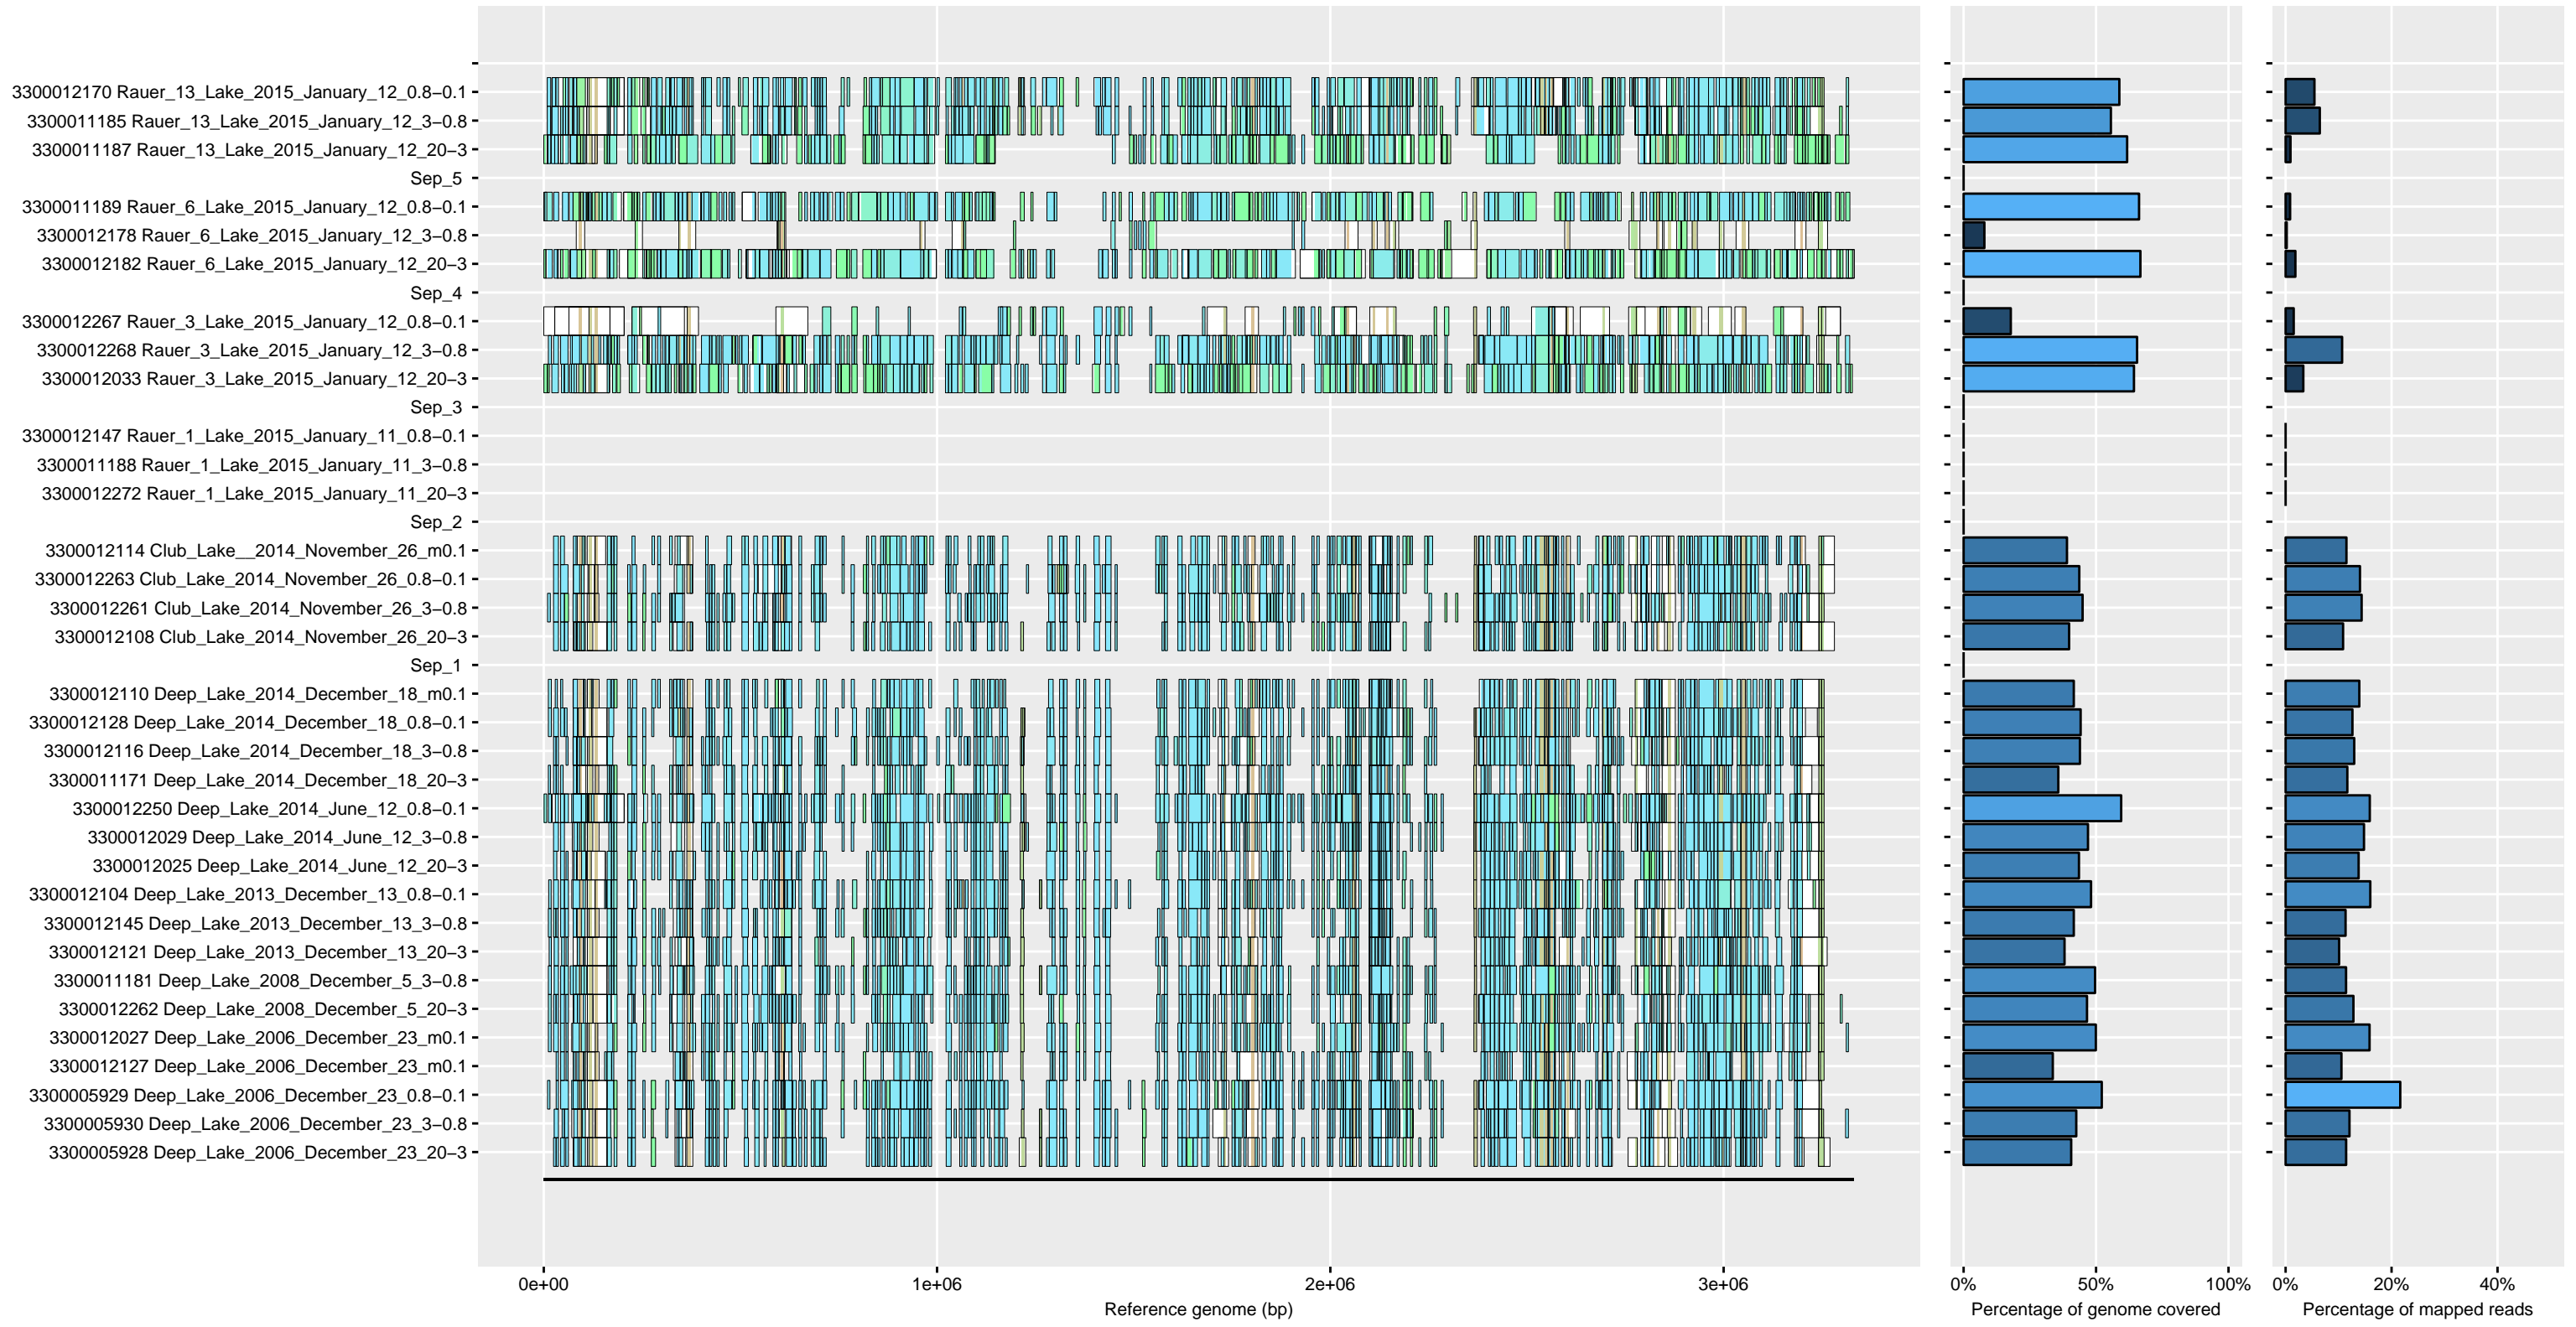

d

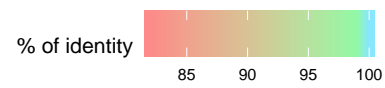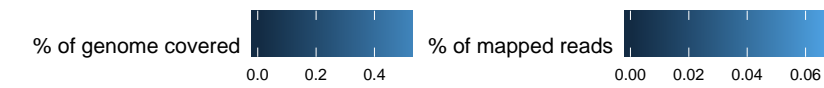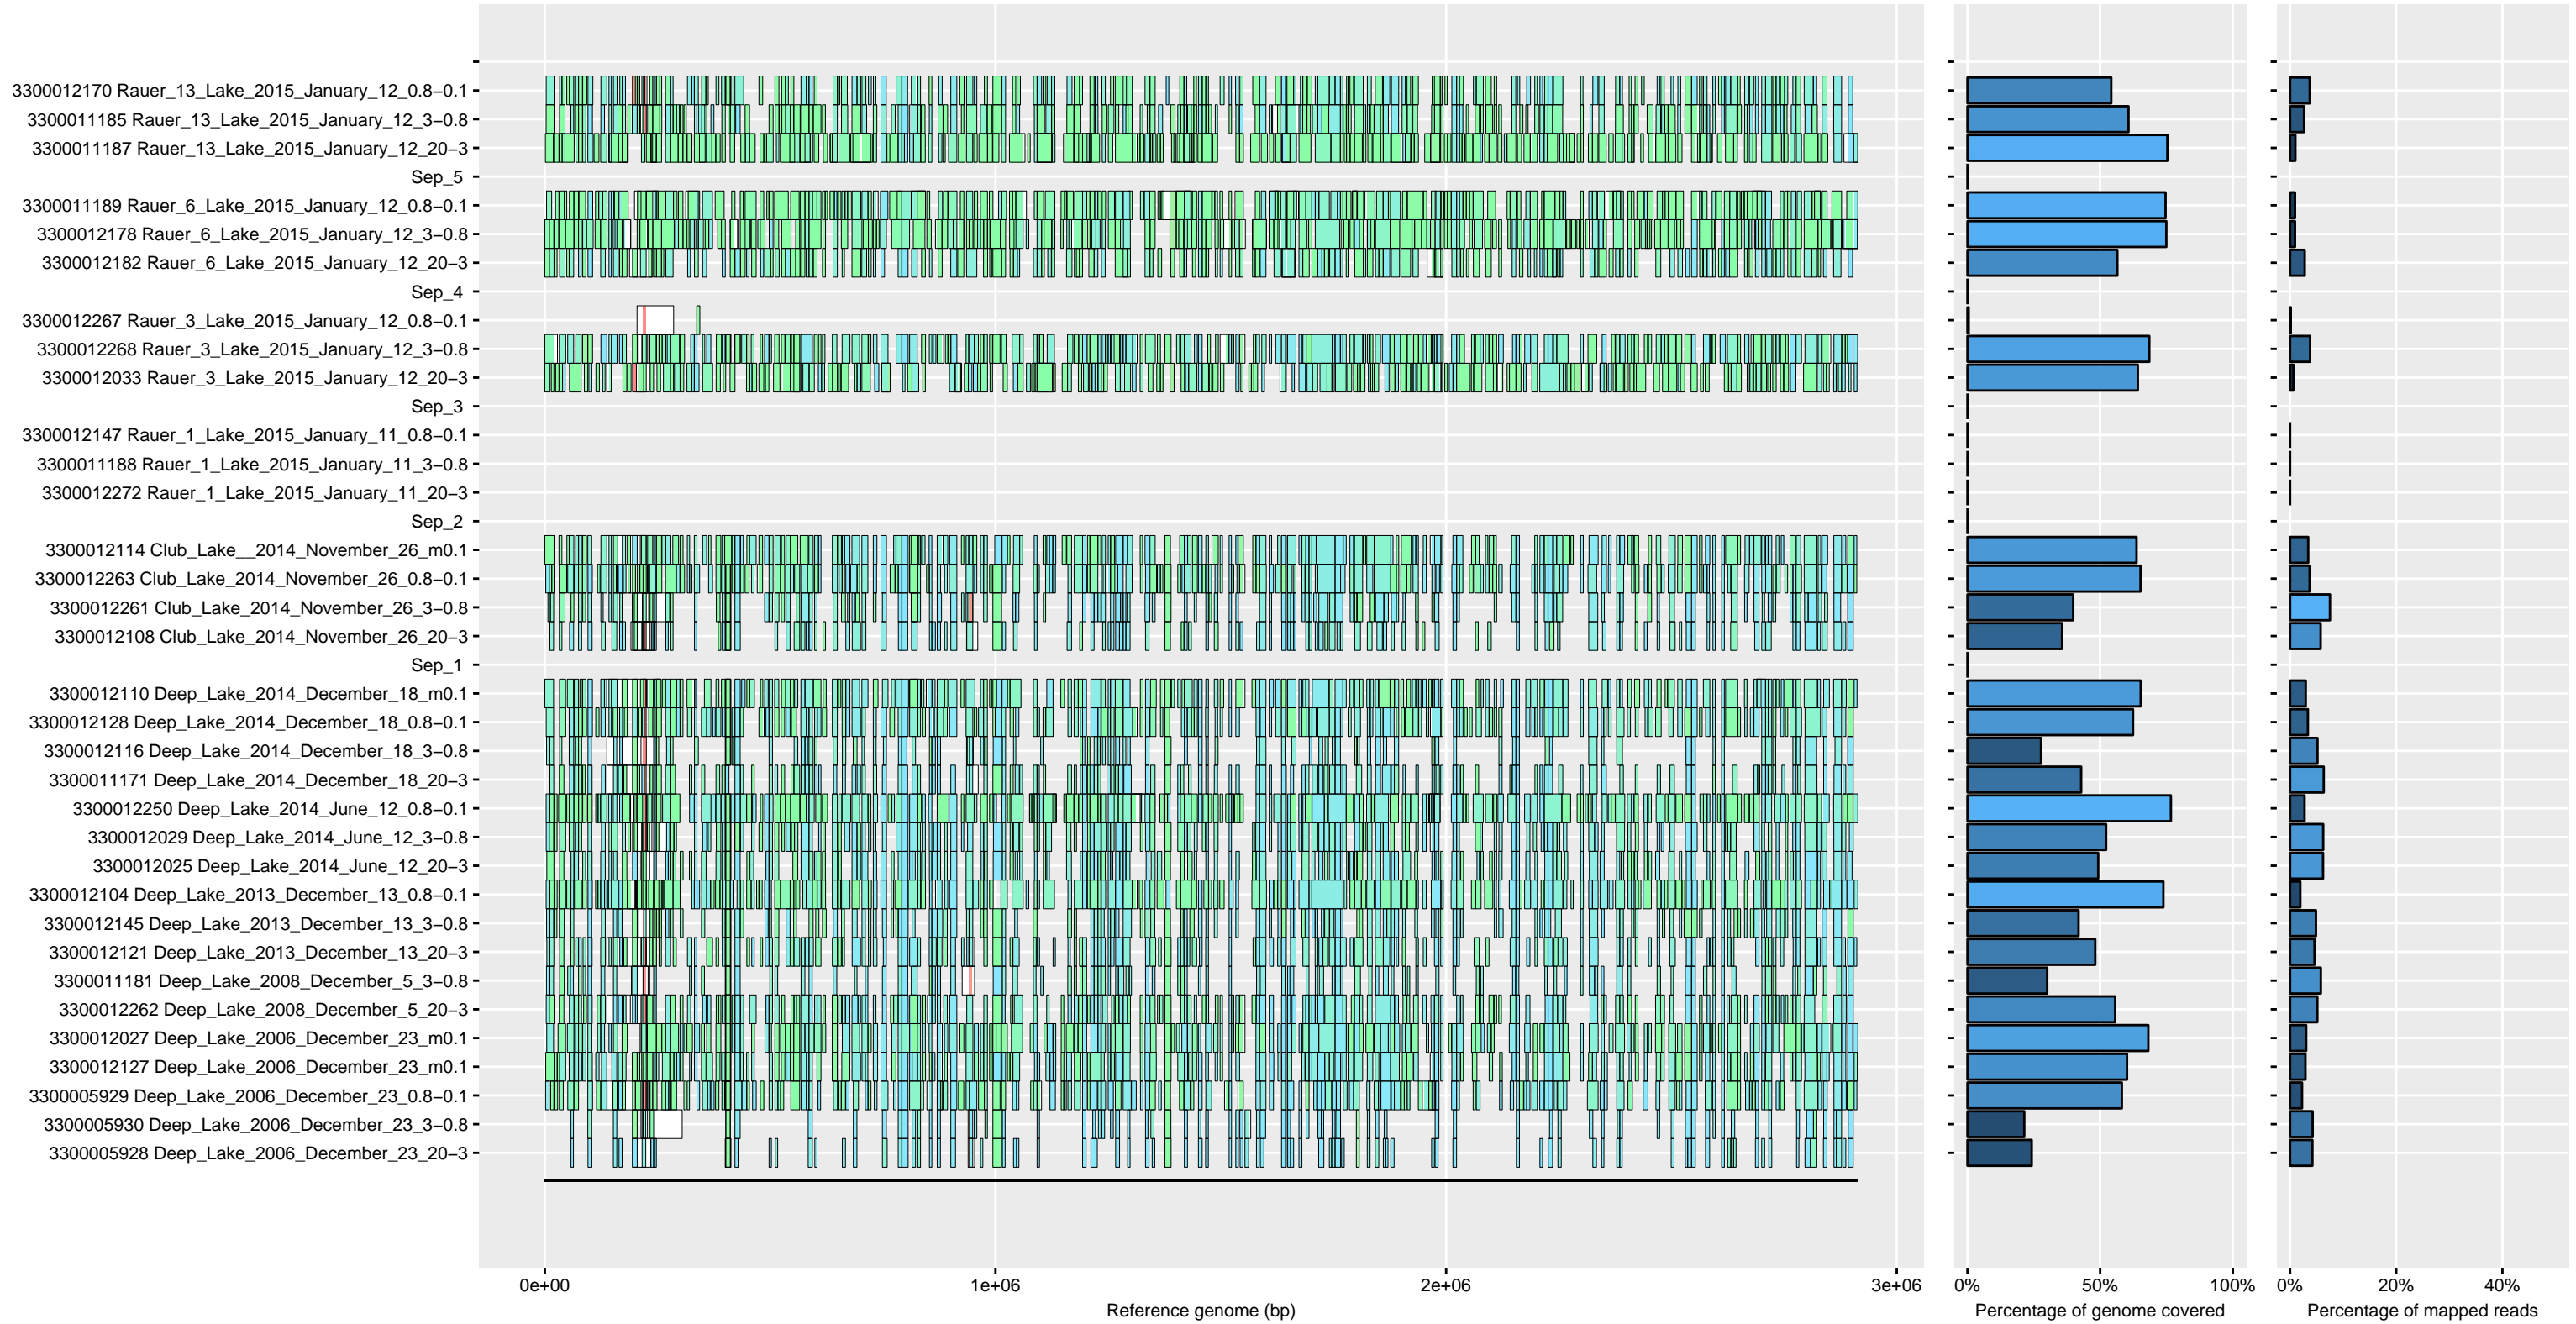

e

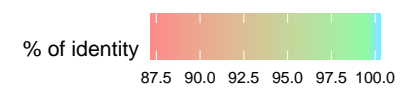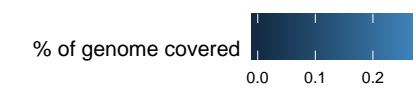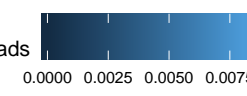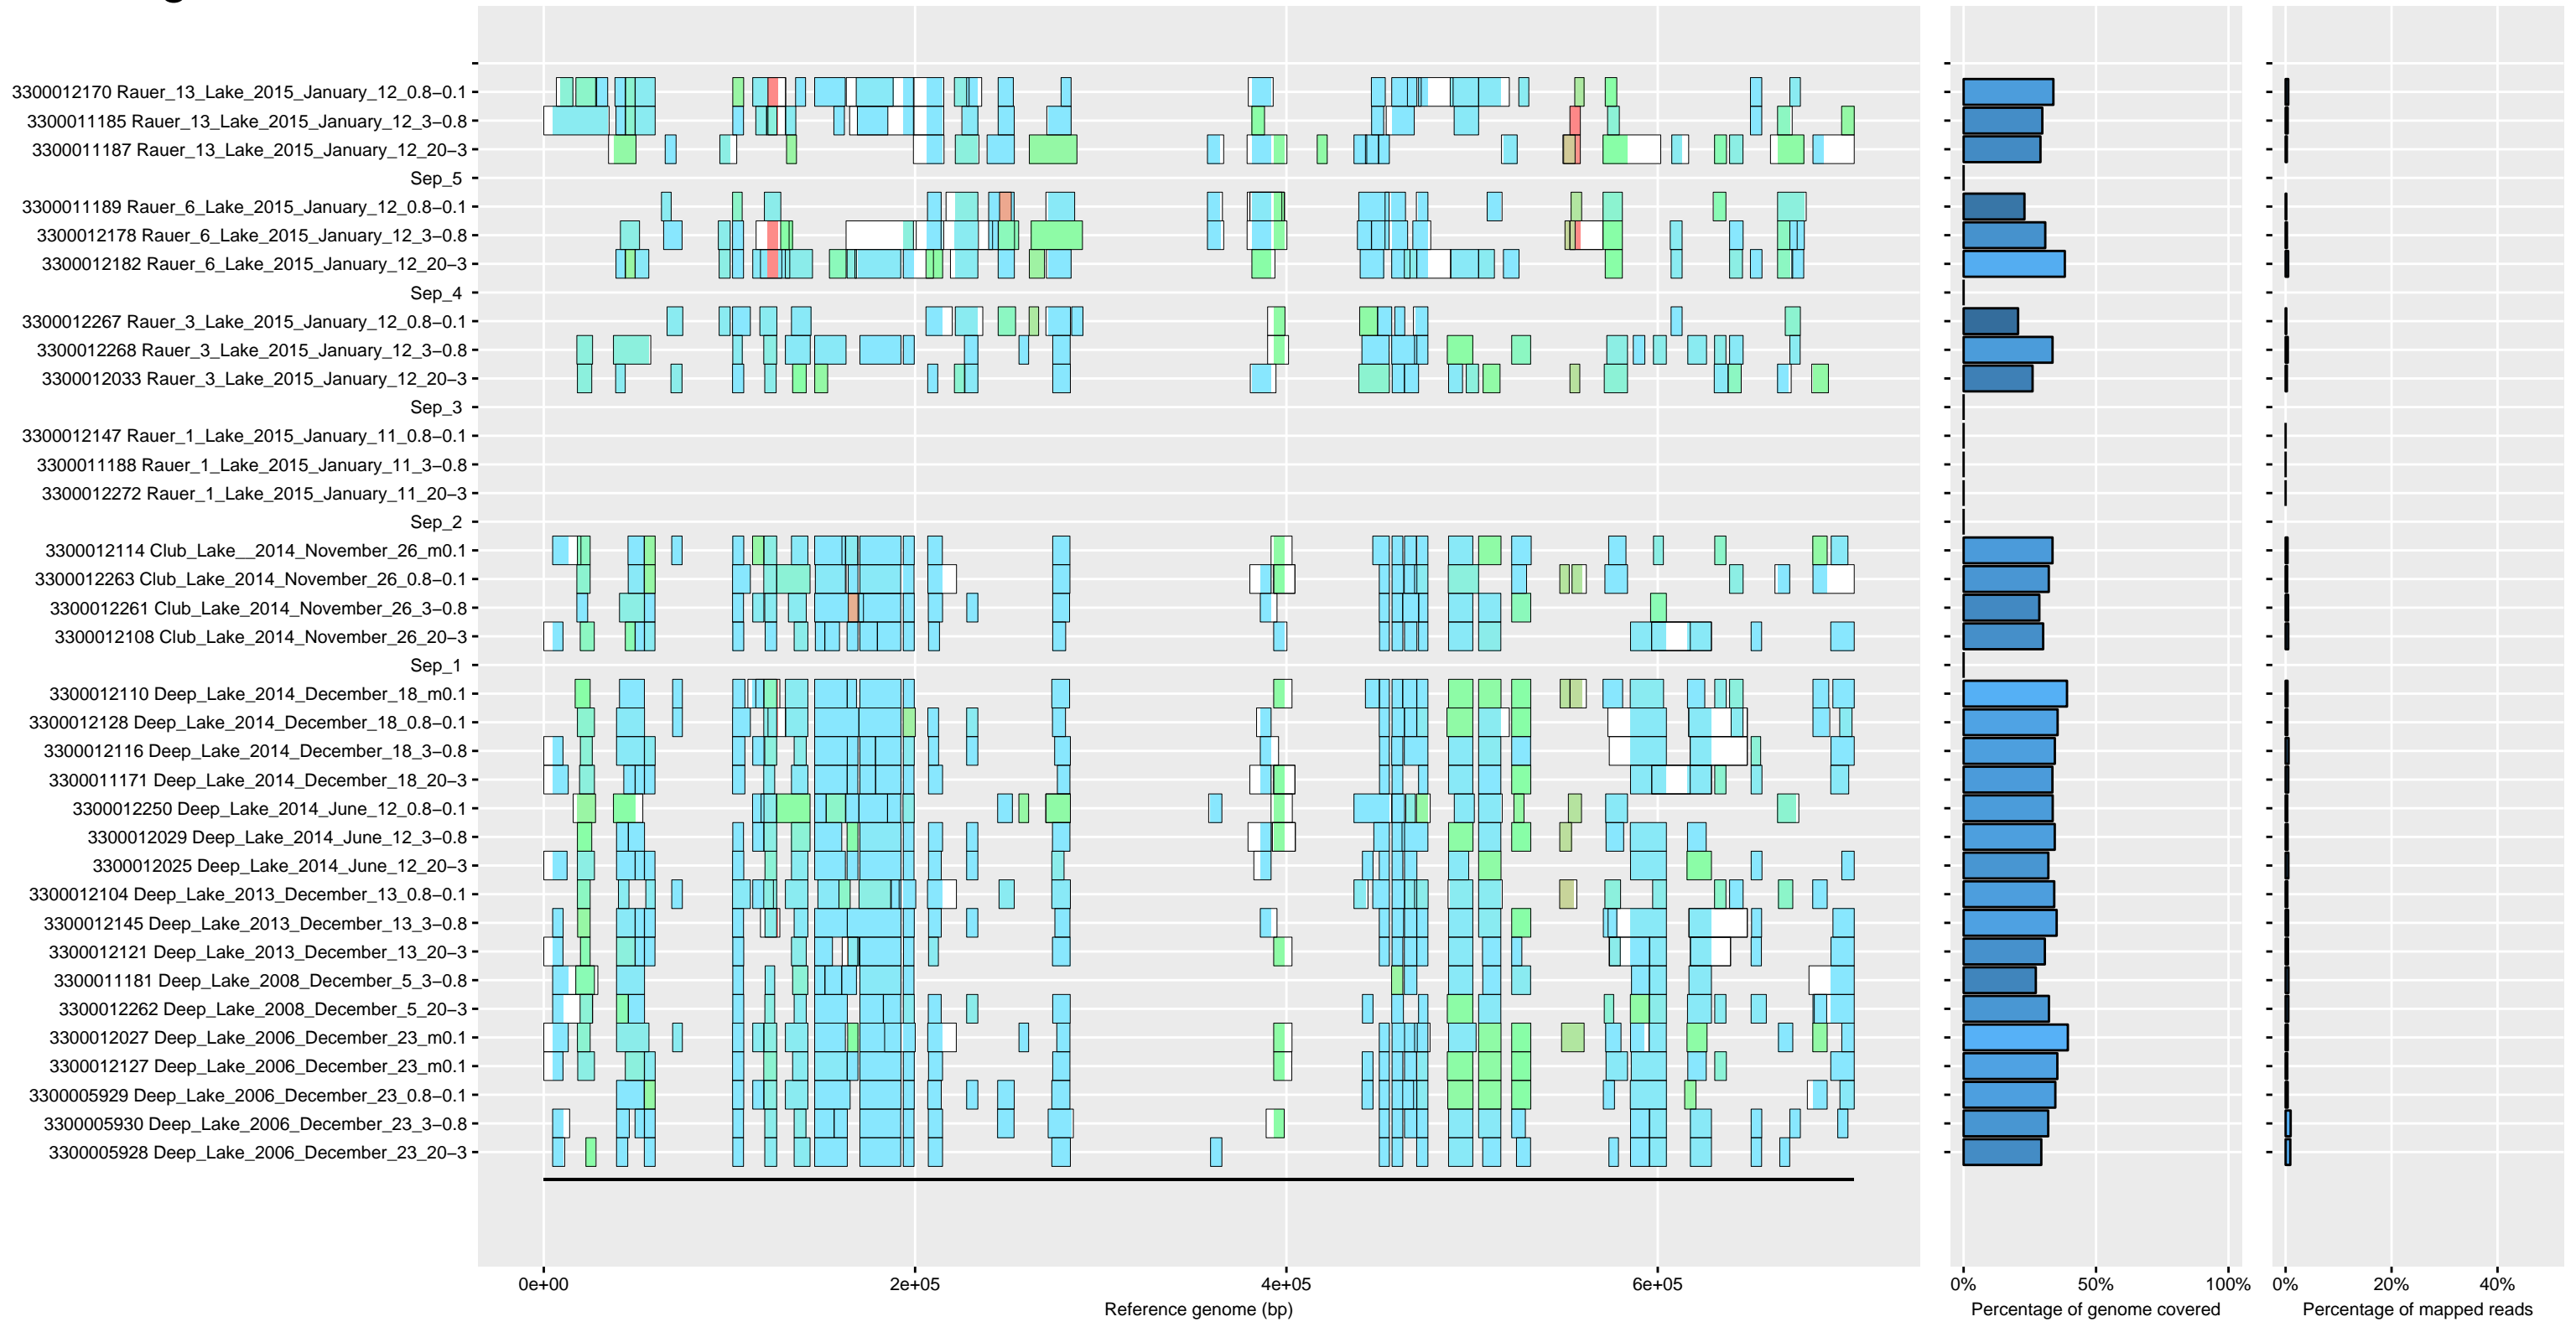

f

% of genome covered 0 % of mapped reads 0

3300012170 Rauer\_13\_Lake\_2015\_January\_12\_0.8-0.1  
3300011185 Rauer\_13\_Lake\_2015\_January\_12\_3-0.8  
3300011187 Rauer\_13\_Lake\_2015\_January\_12\_20-3  
Sep\_5  
3300011189 Rauer\_6\_Lake\_2015\_January\_12\_0.8-0.1  
3300012178 Rauer\_6\_Lake\_2015\_January\_12\_3-0.8  
3300012182 Rauer\_6\_Lake\_2015\_January\_12\_20-3  
Sep\_4  
3300012267 Rauer\_3\_Lake\_2015\_January\_12\_0.8-0.1  
3300012268 Rauer\_3\_Lake\_2015\_January\_12\_3-0.8  
3300012033 Rauer\_3\_Lake\_2015\_January\_12\_20-3  
Sep\_3  
3300012147 Rauer\_1\_Lake\_2015\_January\_11\_0.8-0.1  
3300011188 Rauer\_1\_Lake\_2015\_January\_11\_3-0.8  
3300012272 Rauer\_1\_Lake\_2015\_January\_11\_20-3  
Sep\_2  
3300012114 Club\_Lake\_2014\_November\_26\_m0.1  
3300012263 Club\_Lake\_2014\_November\_26\_0.8-0.1  
3300012261 Club\_Lake\_2014\_November\_26\_3-0.8  
3300012108 Club\_Lake\_2014\_November\_26\_20-3  
Sep\_1  
3300012110 Deep\_Lake\_2014\_December\_18\_m0.1  
3300012128 Deep\_Lake\_2014\_December\_18\_0.8-0.1  
3300012116 Deep\_Lake\_2014\_December\_18\_3-0.8  
3300011171 Deep\_Lake\_2014\_December\_18\_20-3  
3300012250 Deep\_Lake\_2014\_June\_12\_0.8-0.1  
3300012029 Deep\_Lake\_2014\_June\_12\_3-0.8  
3300012025 Deep\_Lake\_2014\_June\_12\_20-3  
3300012104 Deep\_Lake\_2013\_December\_13\_0.8-0.1  
3300012145 Deep\_Lake\_2013\_December\_13\_3-0.8  
3300012121 Deep\_Lake\_2013\_December\_13\_20-3  
3300011181 Deep\_Lake\_2008\_December\_5\_3-0.8  
3300012262 Deep\_Lake\_2008\_December\_5\_20-3  
3300012027 Deep\_Lake\_2006\_December\_23\_m0.1  
3300012127 Deep\_Lake\_2006\_December\_23\_m0.1  
3300005929 Deep\_Lake\_2006\_December\_23\_0.8-0.1  
3300005930 Deep\_Lake\_2006\_December\_23\_3-0.8  
3300005928 Deep\_Lake\_2006\_December\_23\_20-3

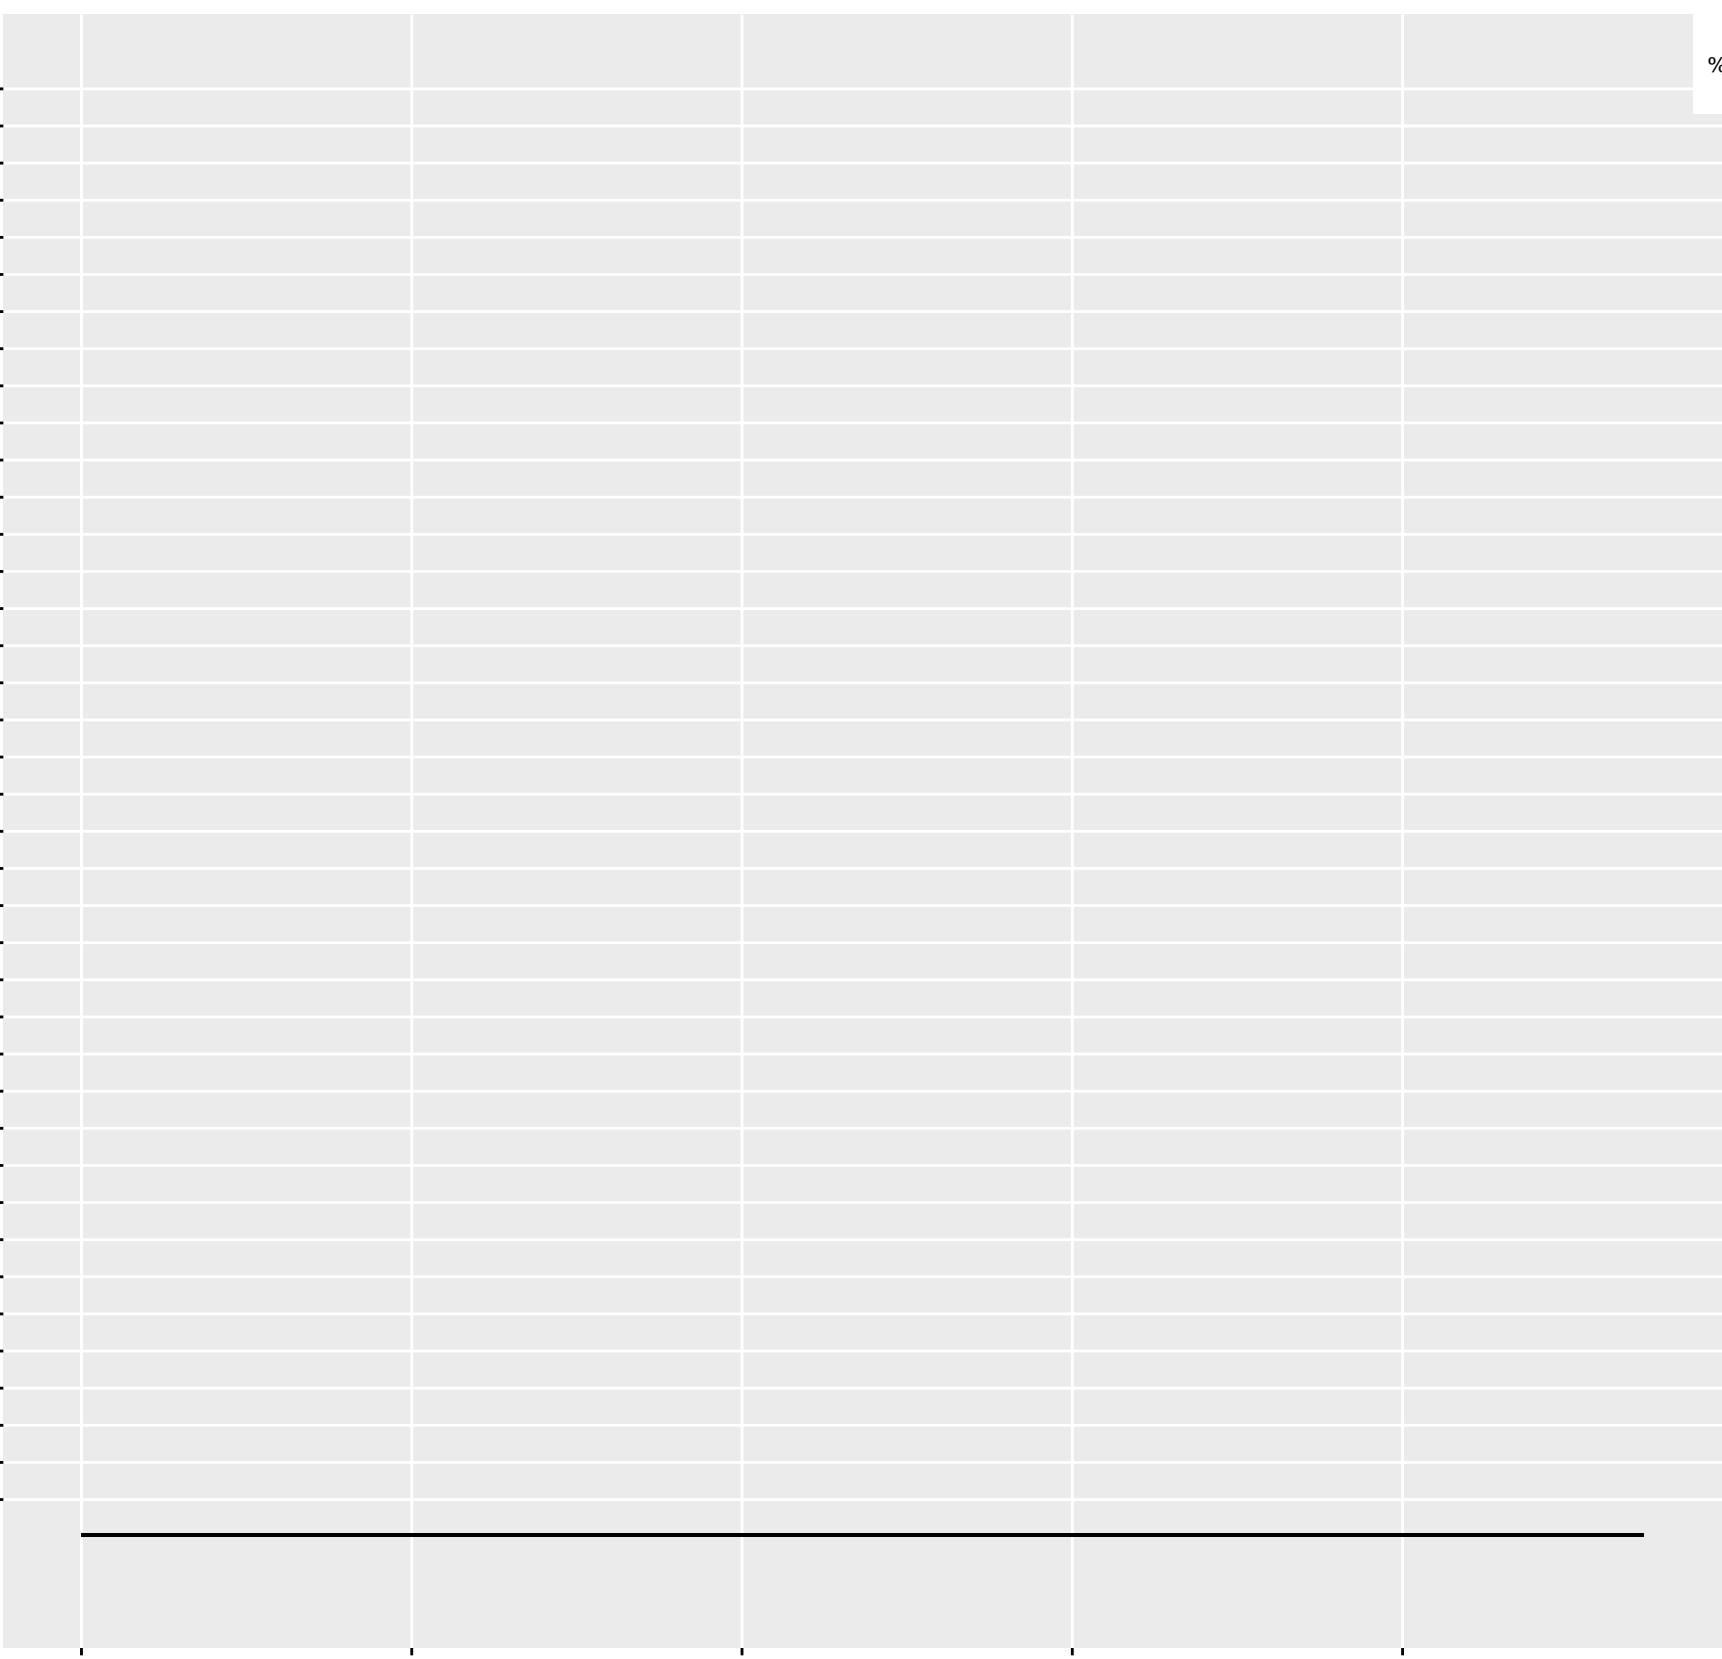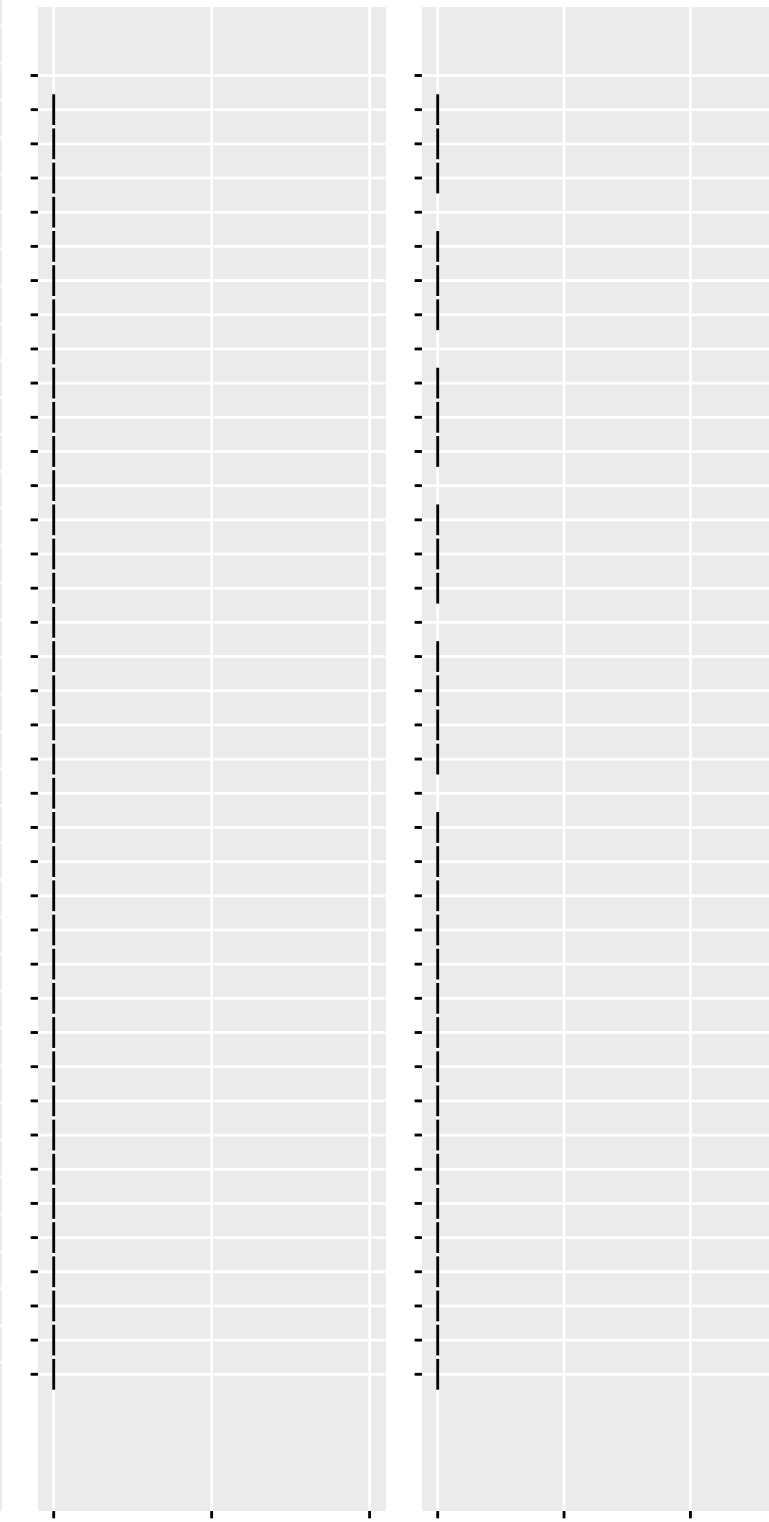

0 5000 10000 15000 20000 Reference genome (bp) 0% 50% 100% 0% 20% 40% Percentage of genome covered Percentage of mapped reads



g

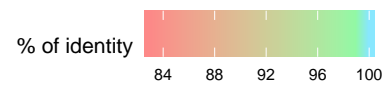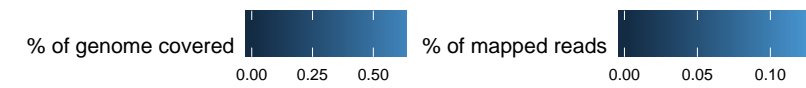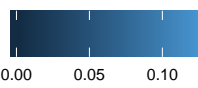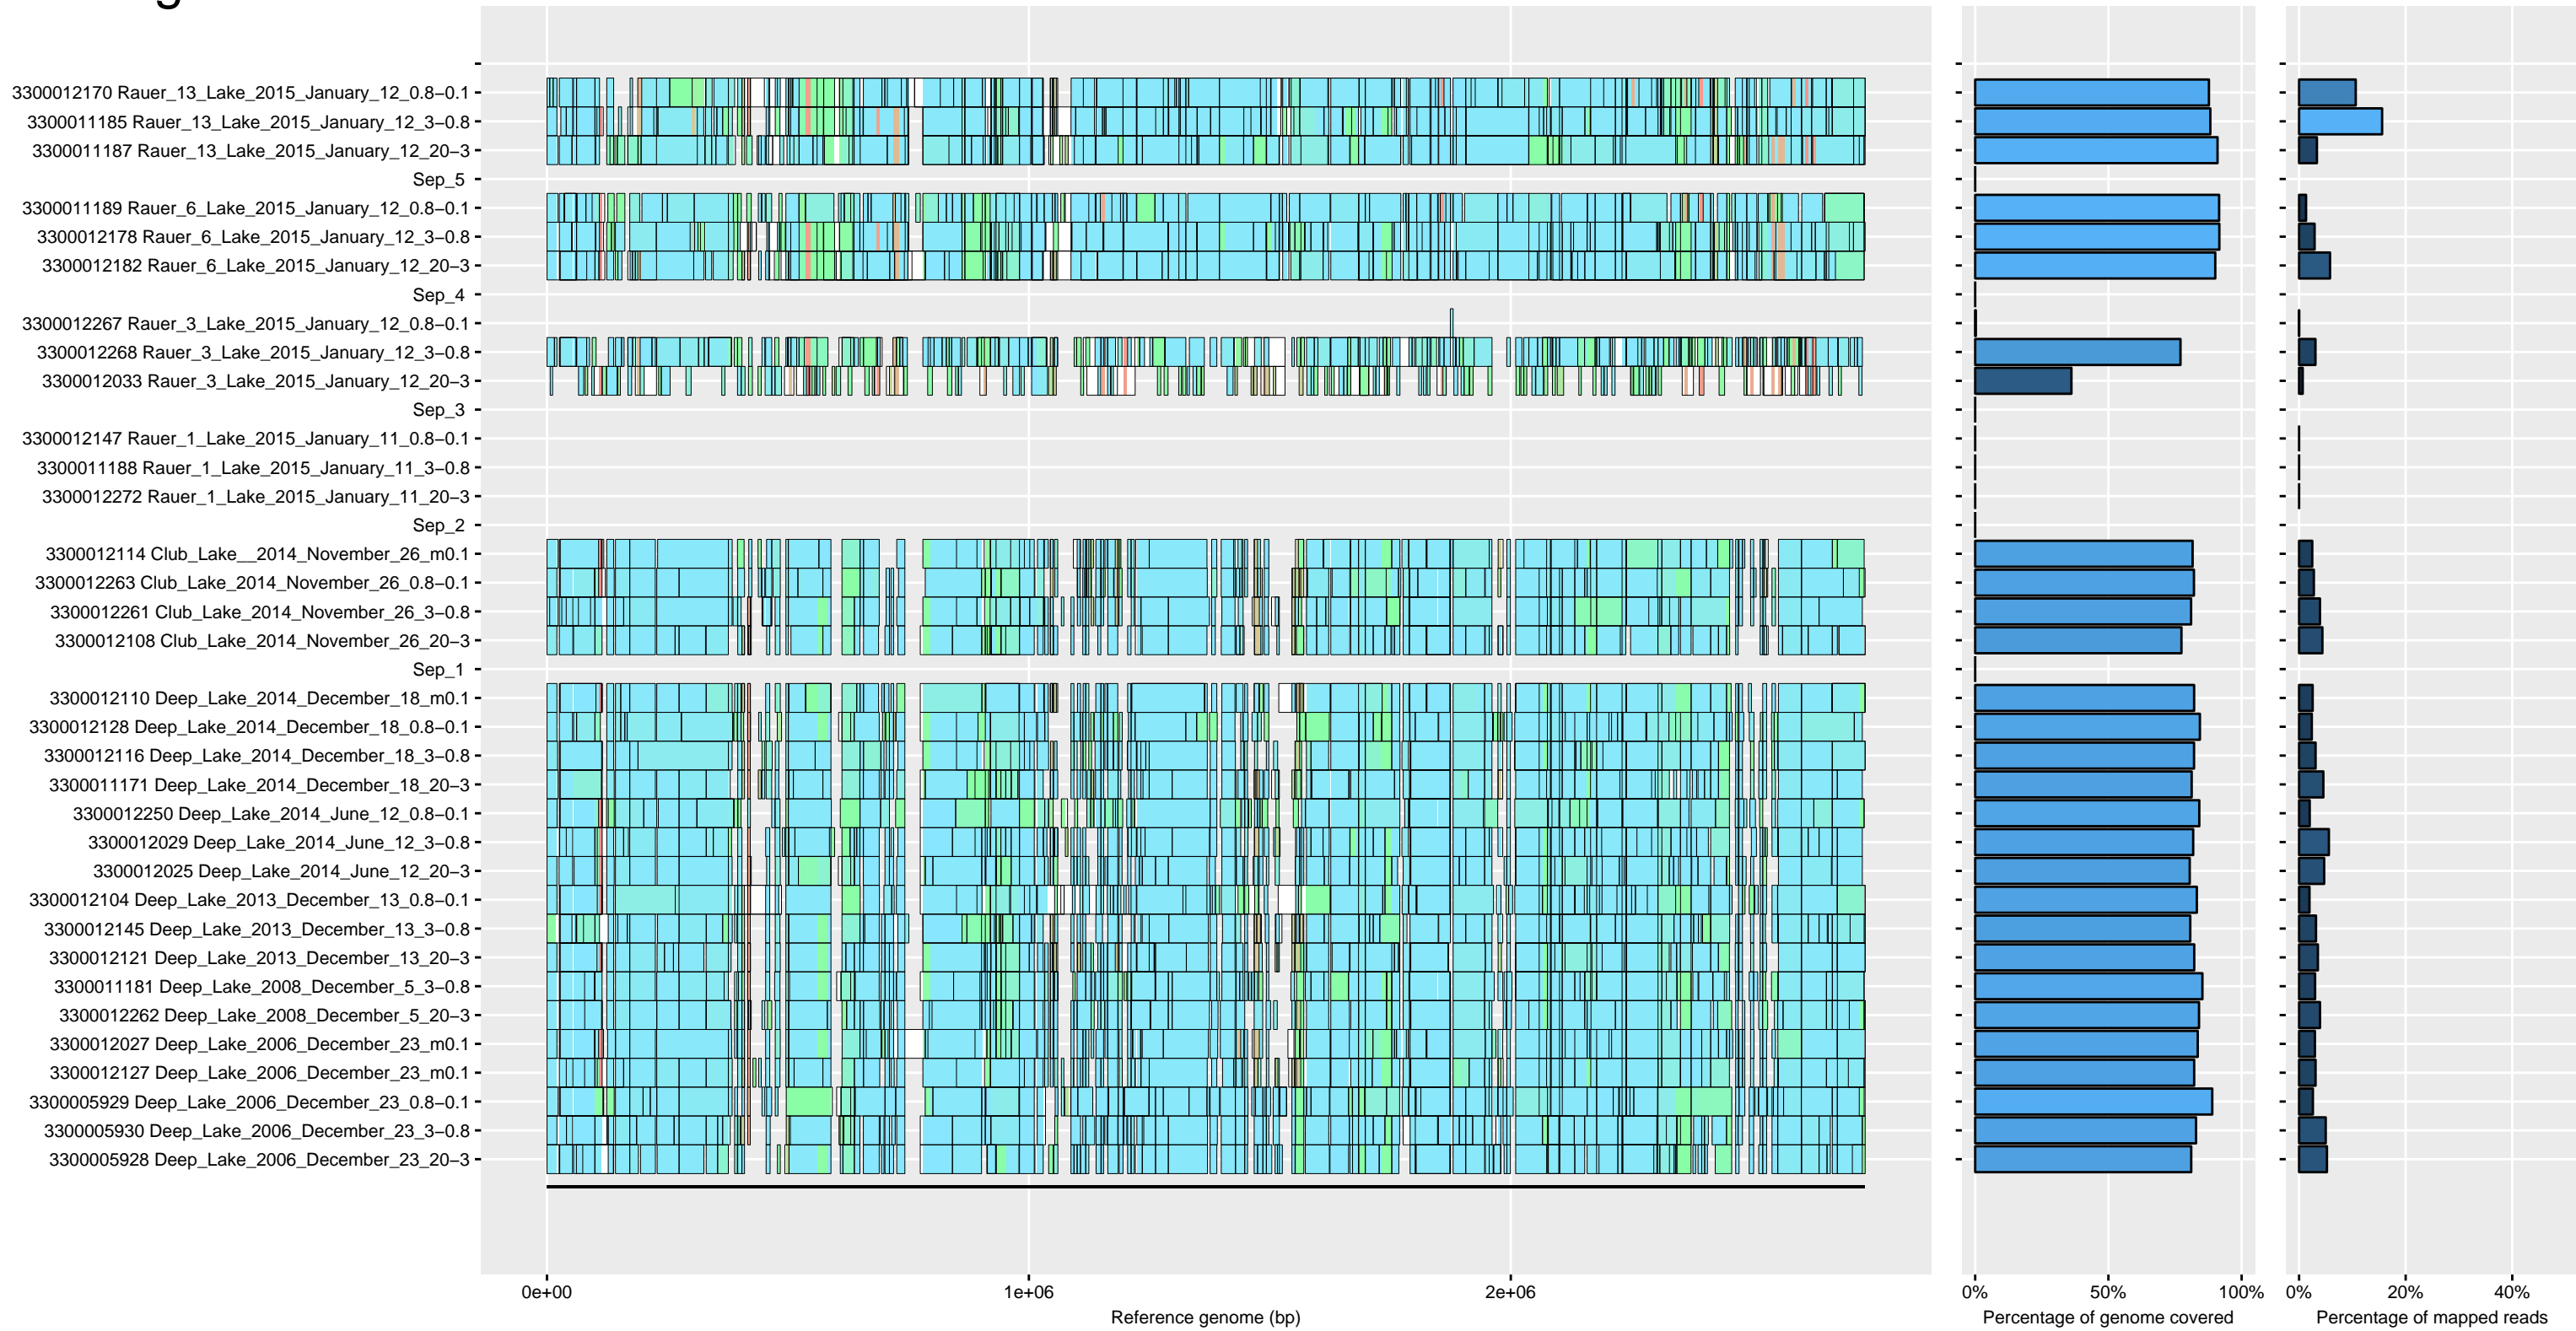

h

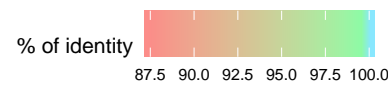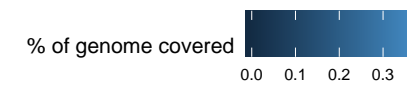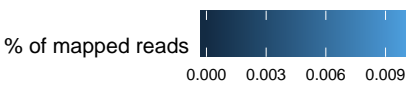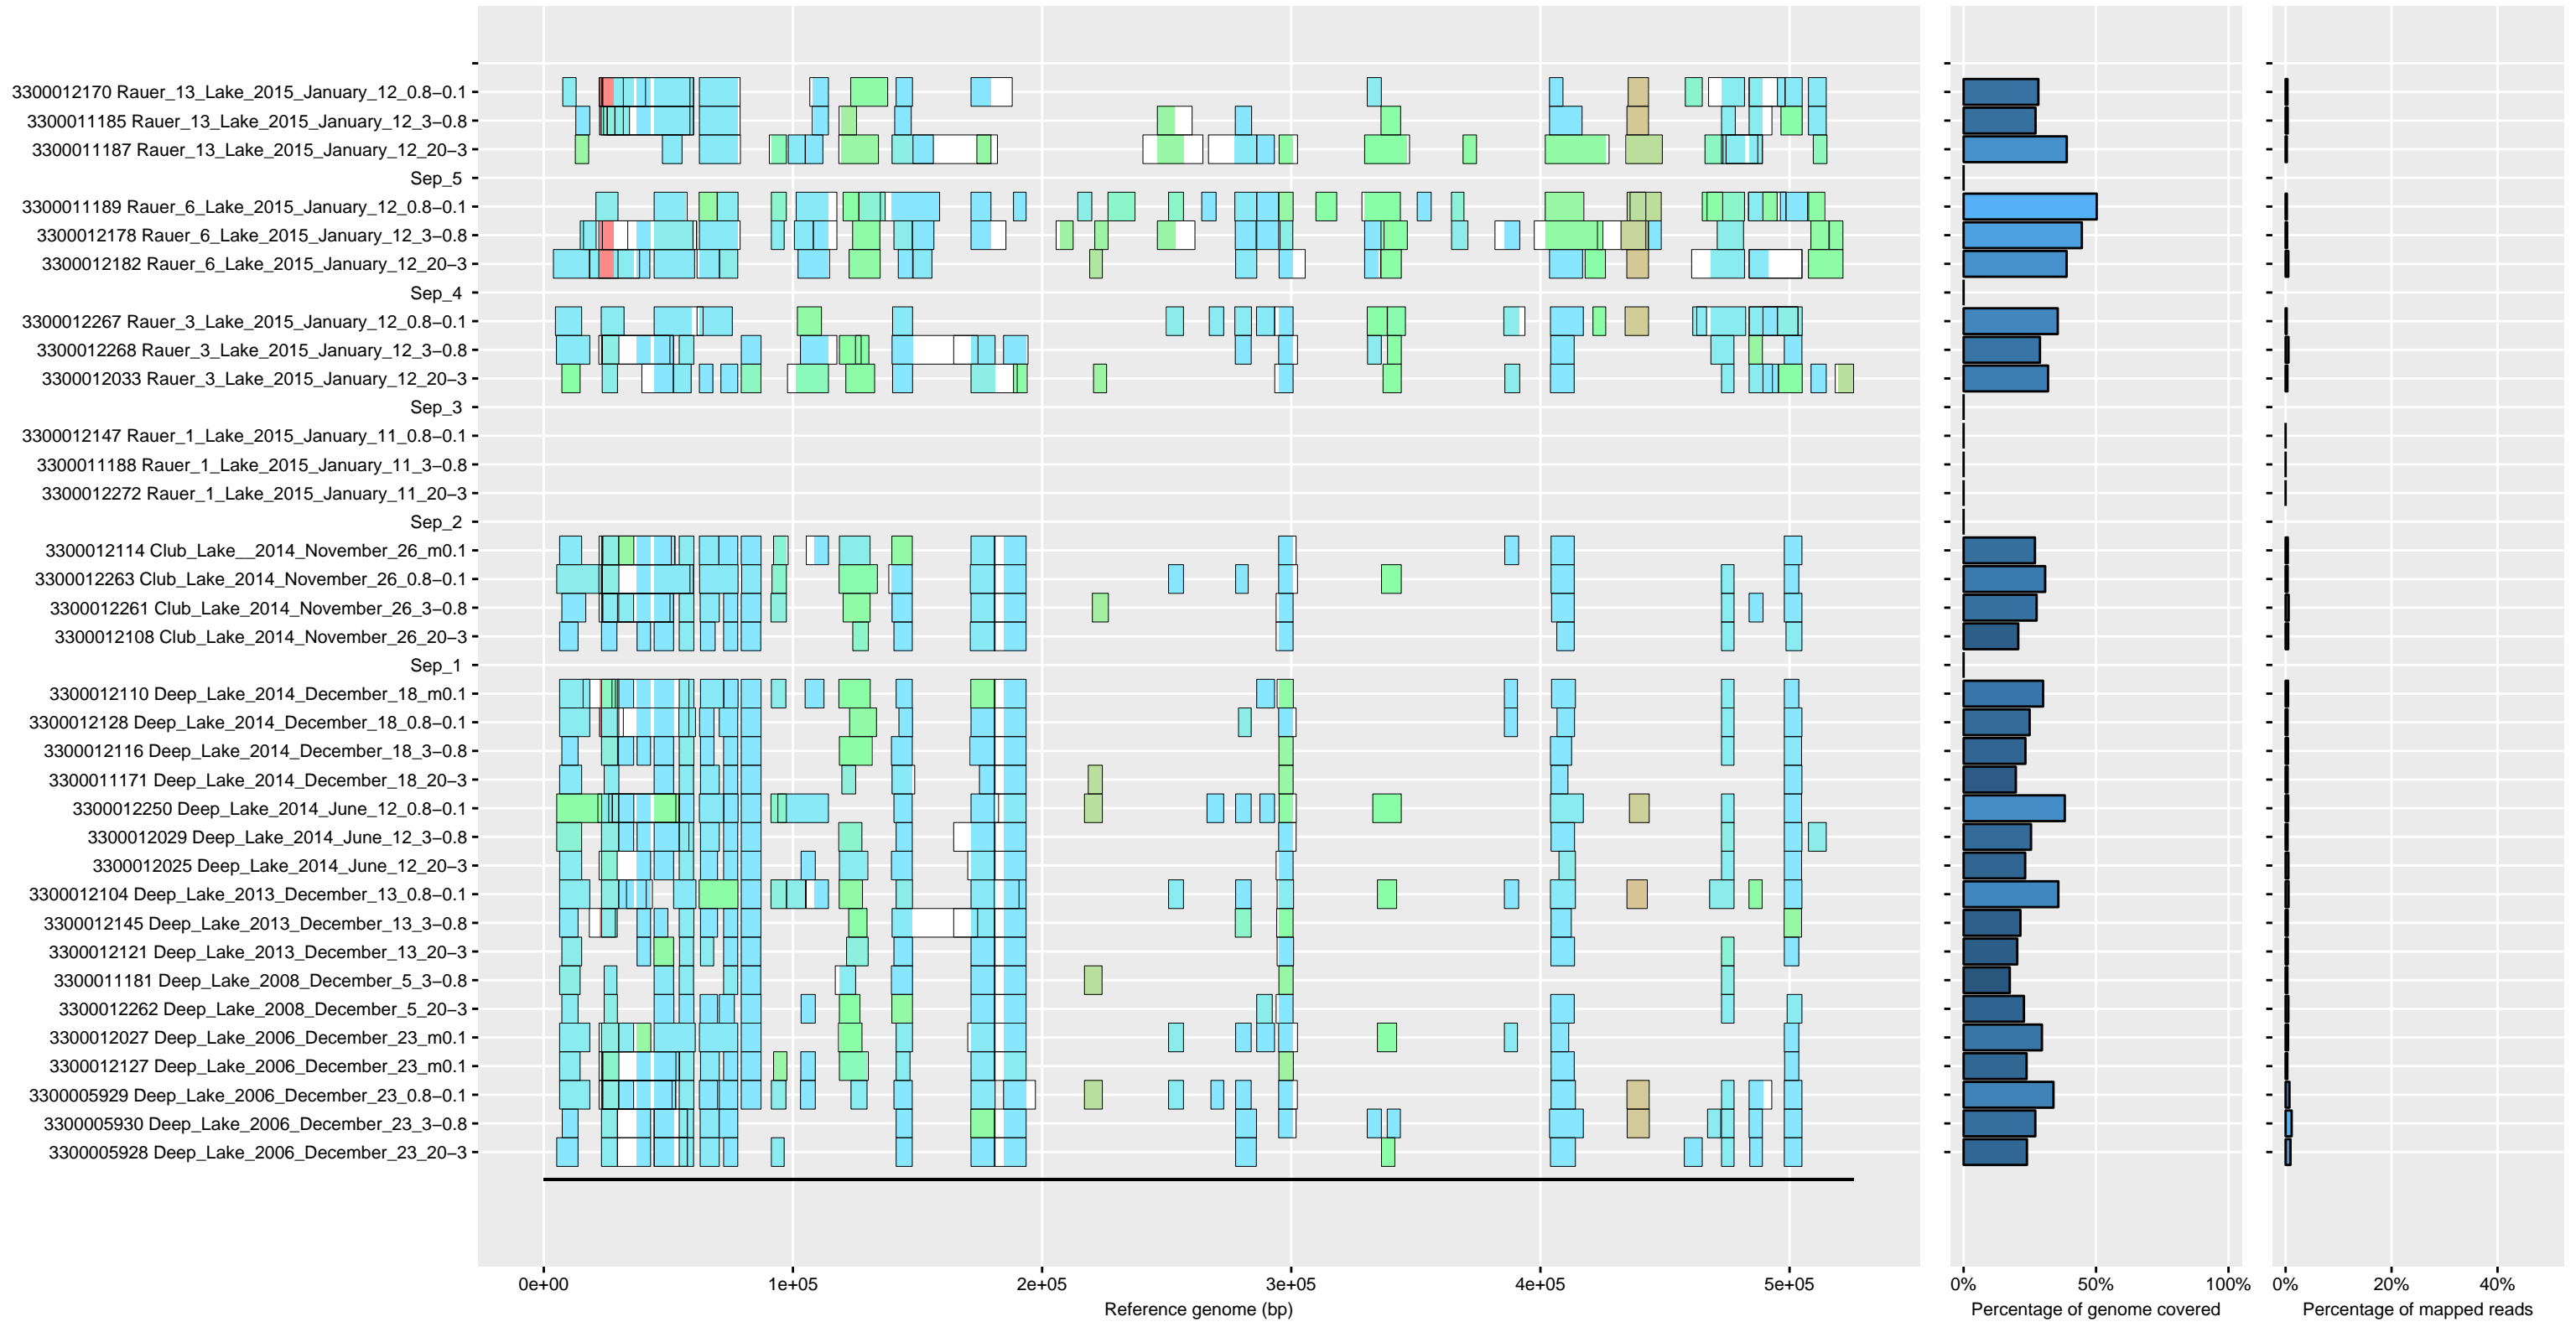

i

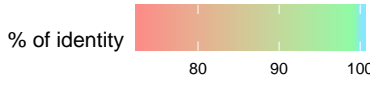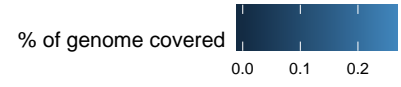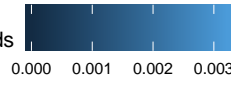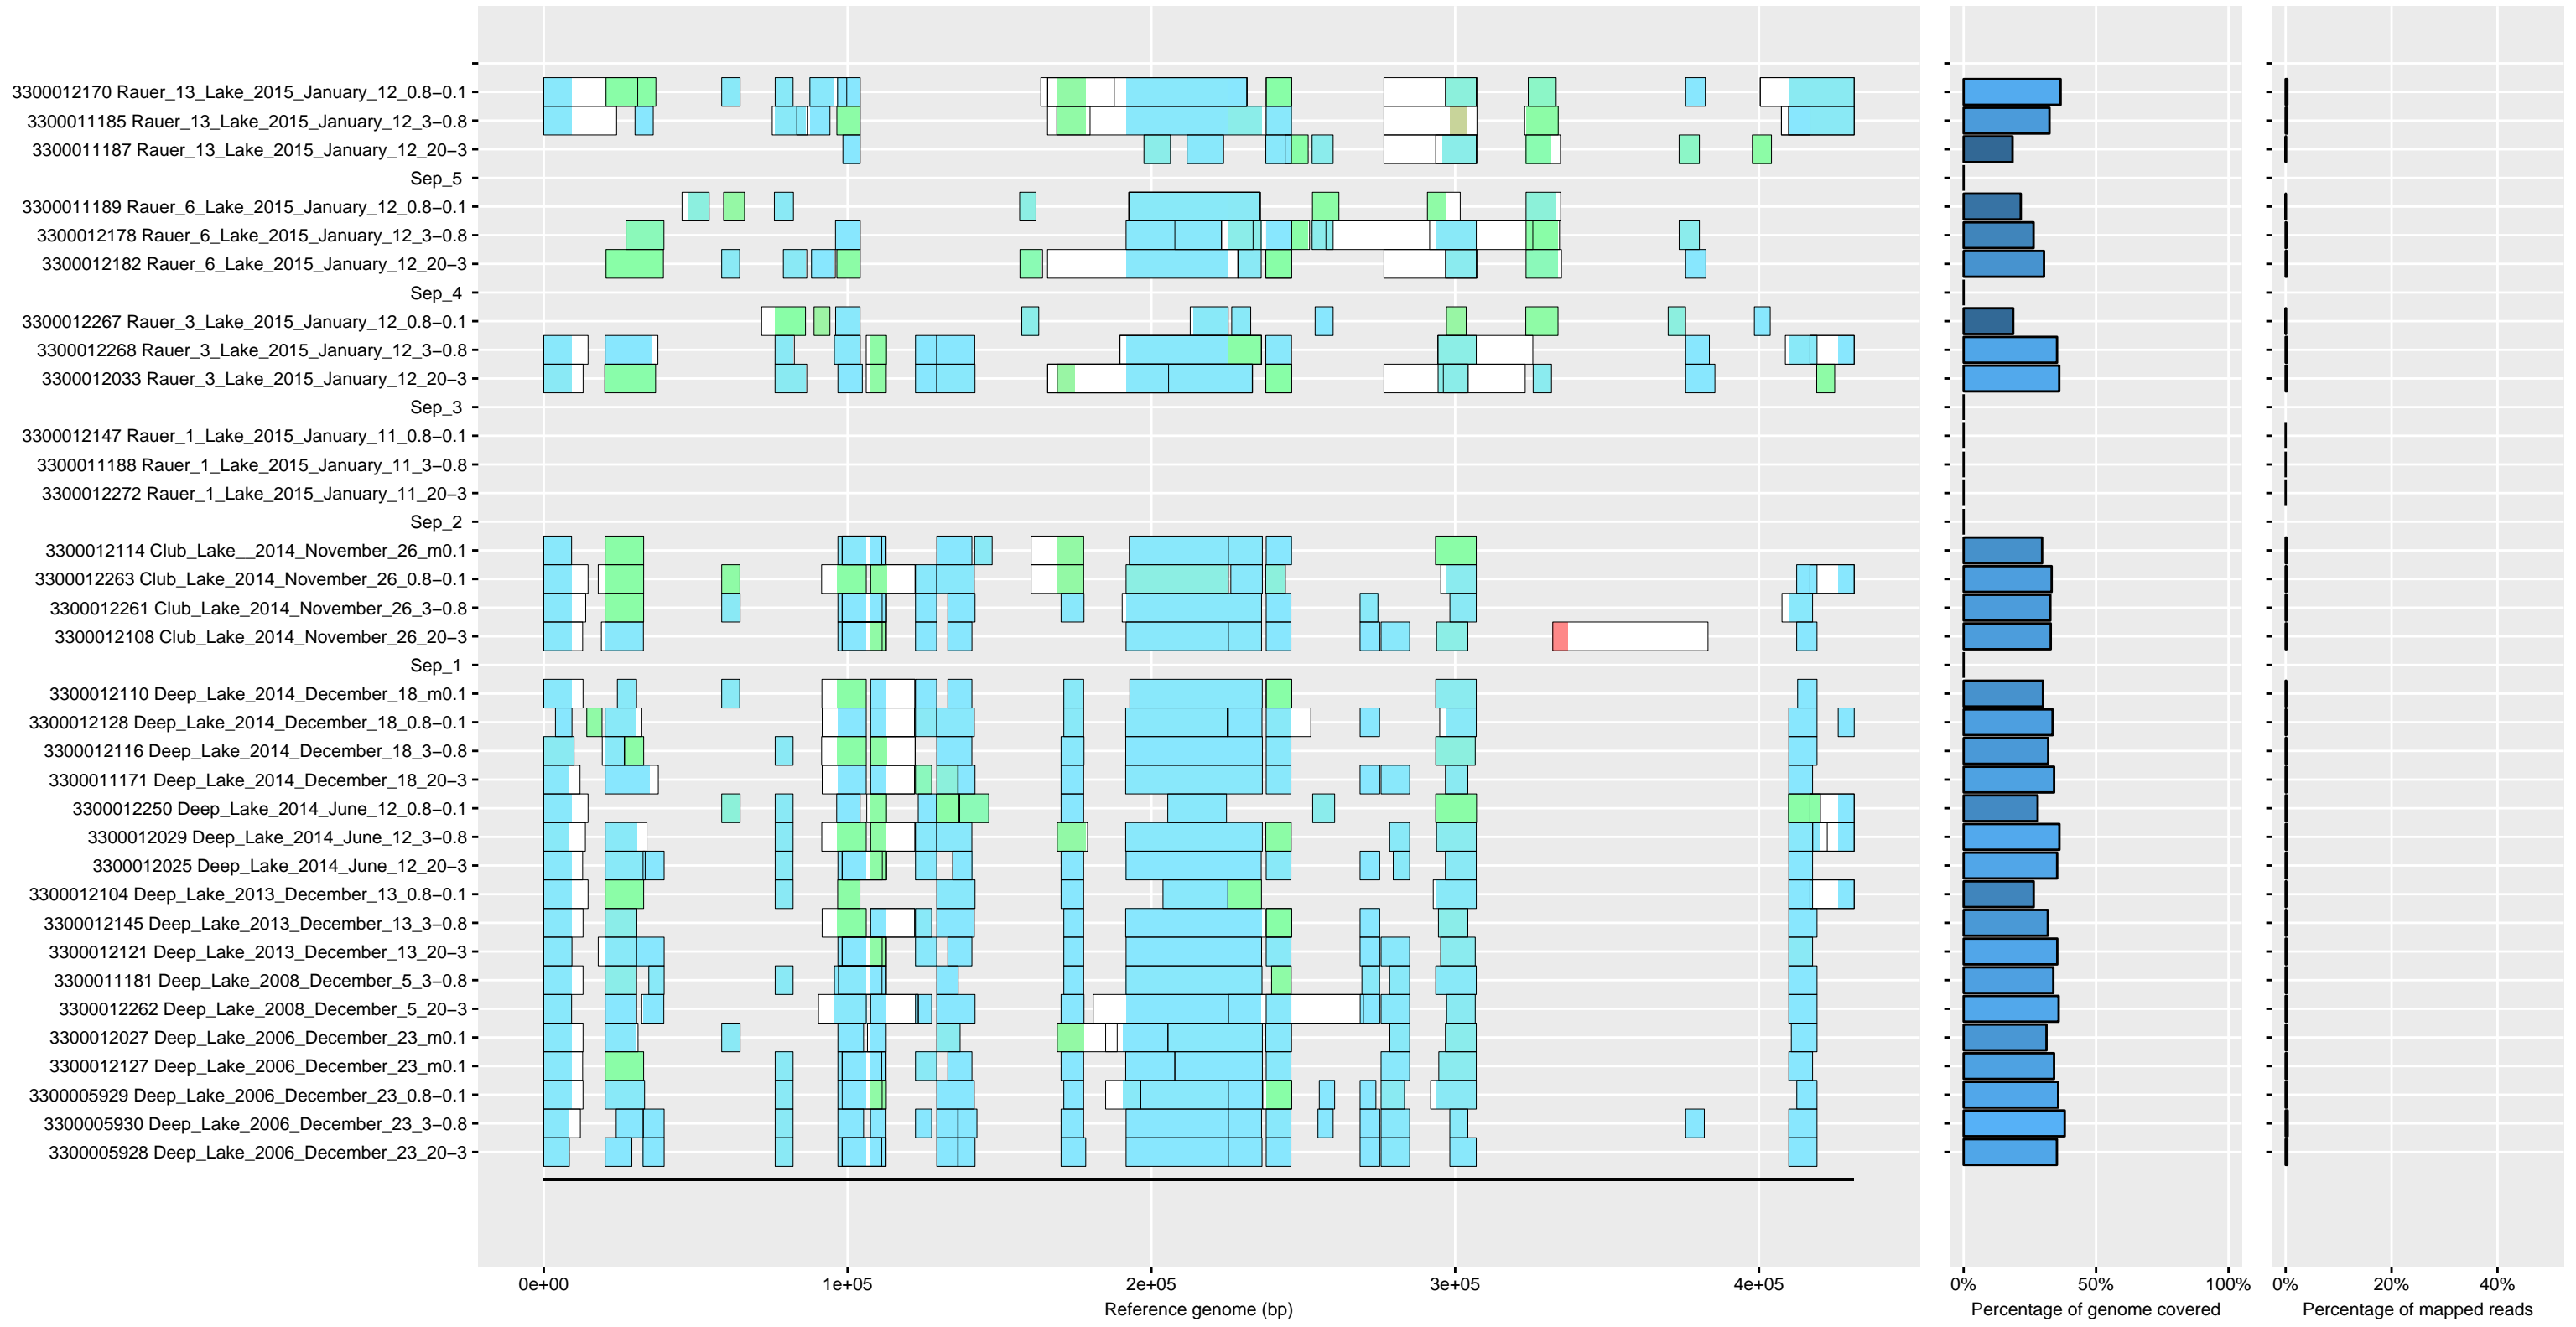

j

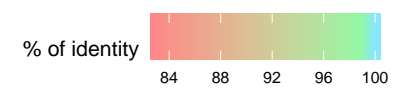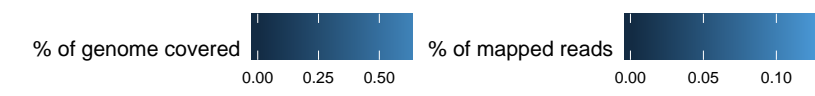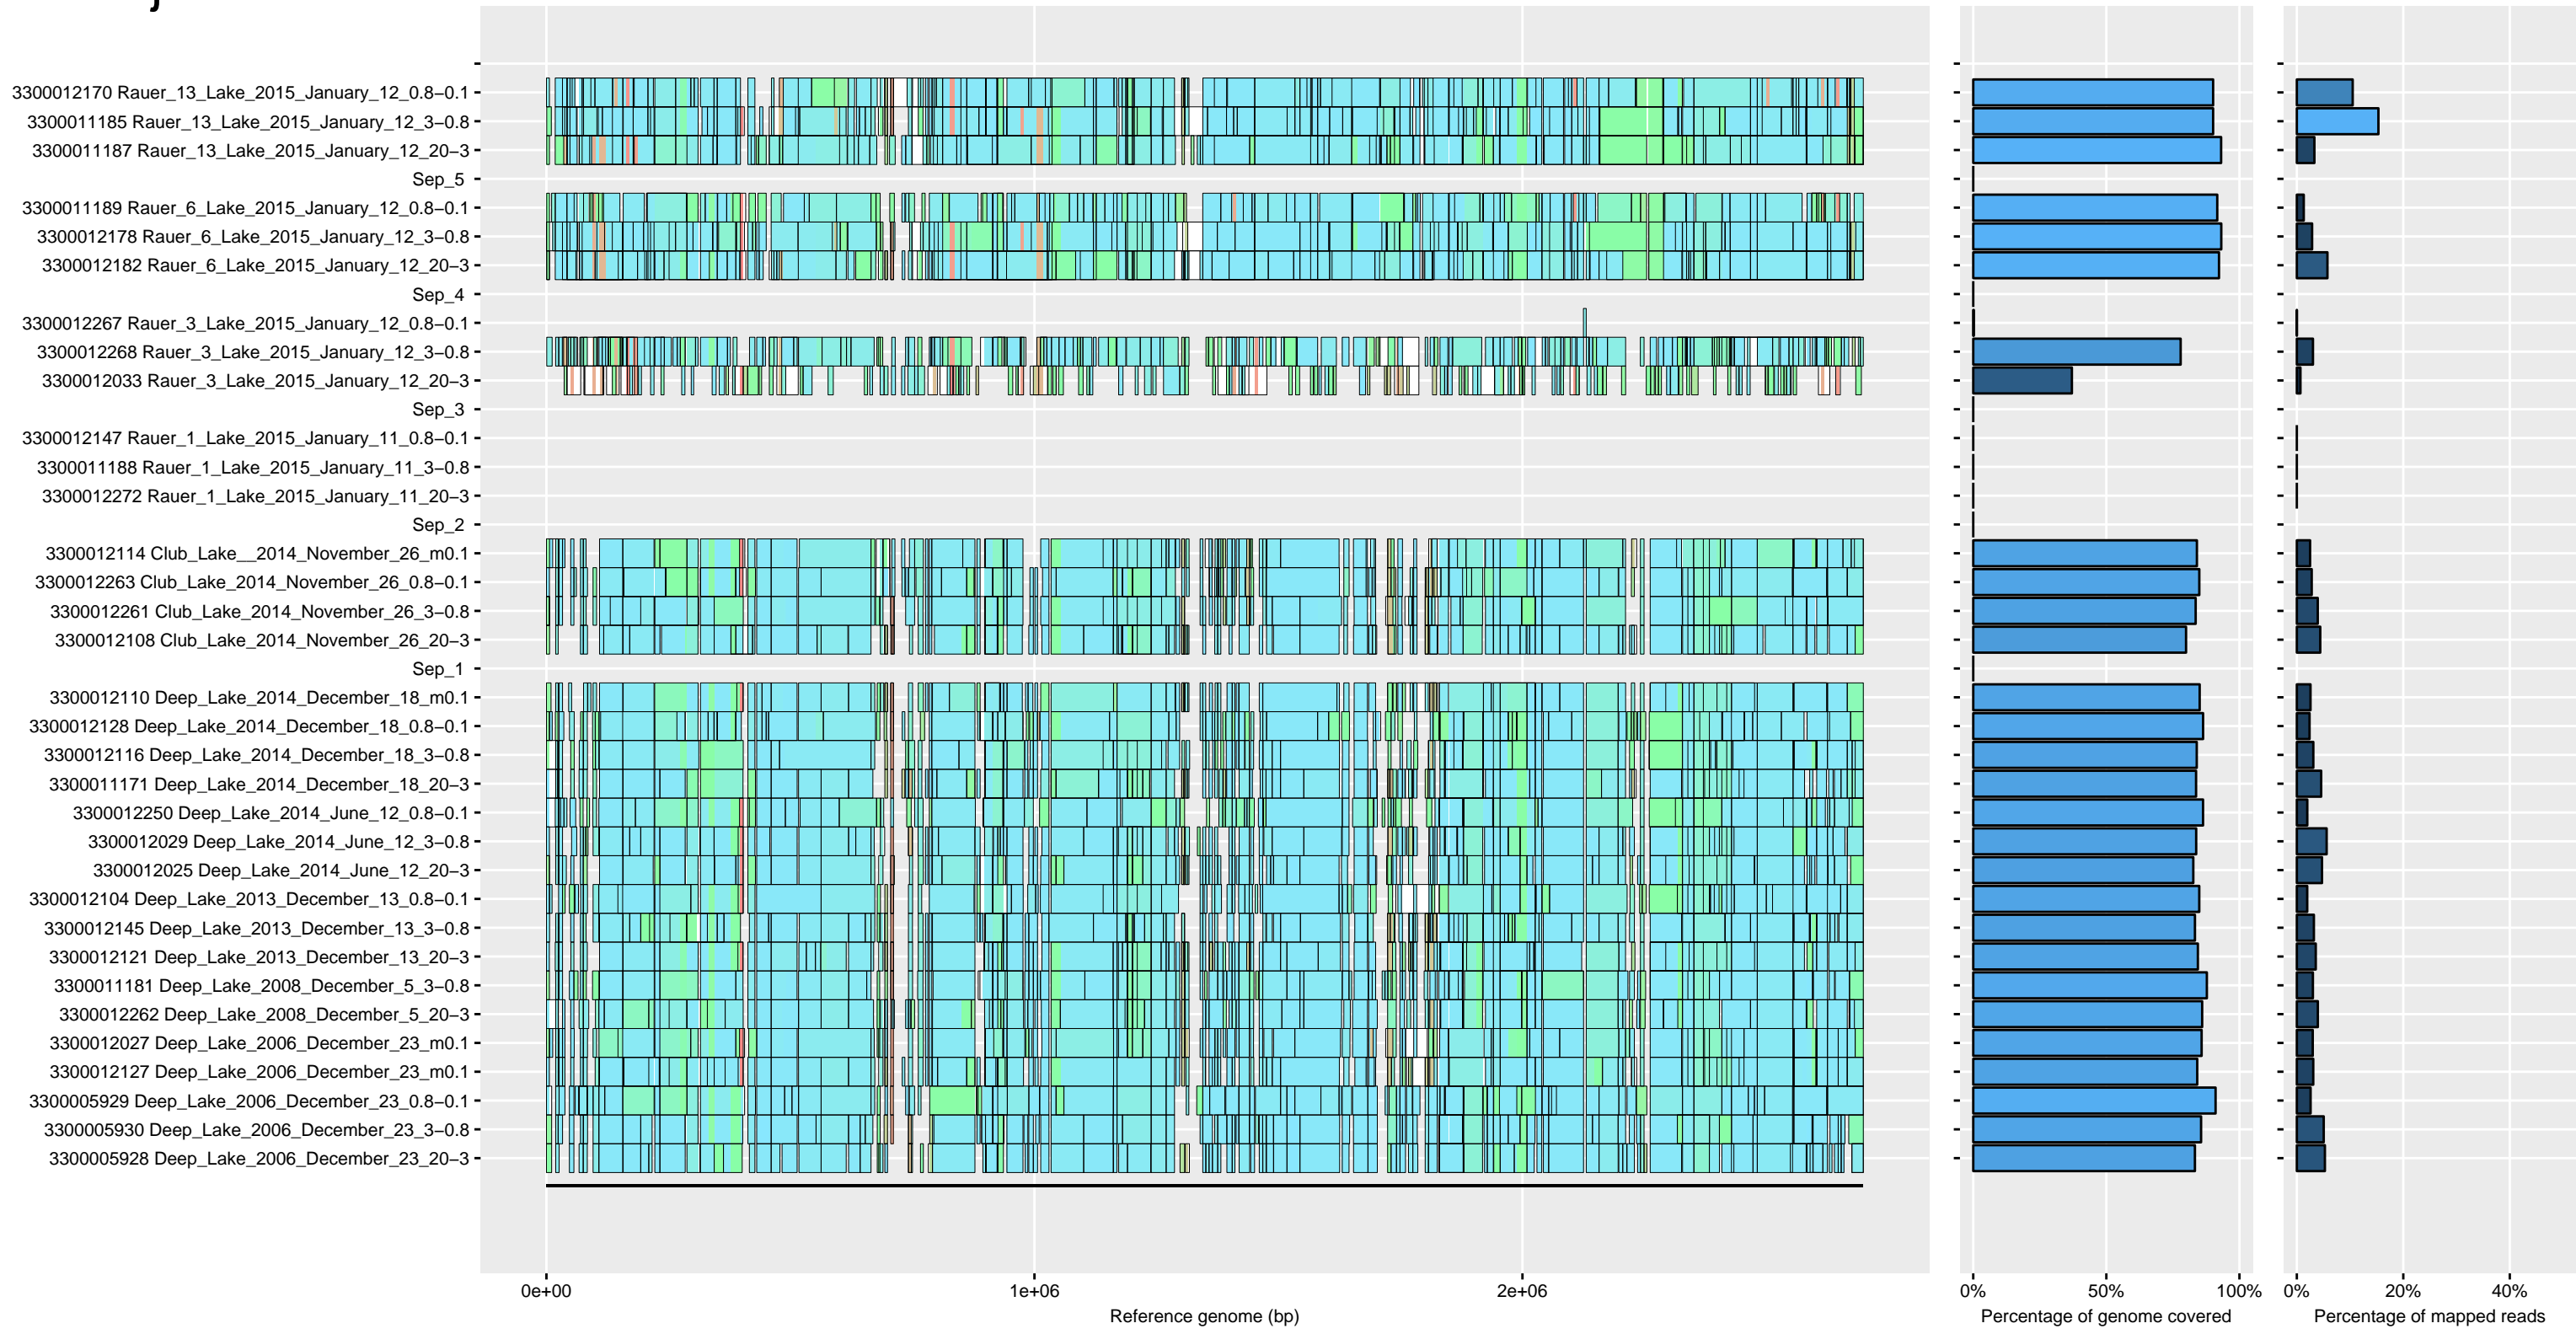



k

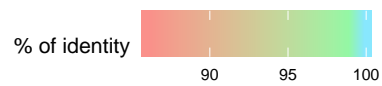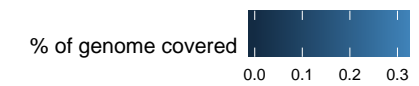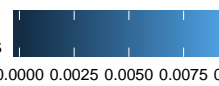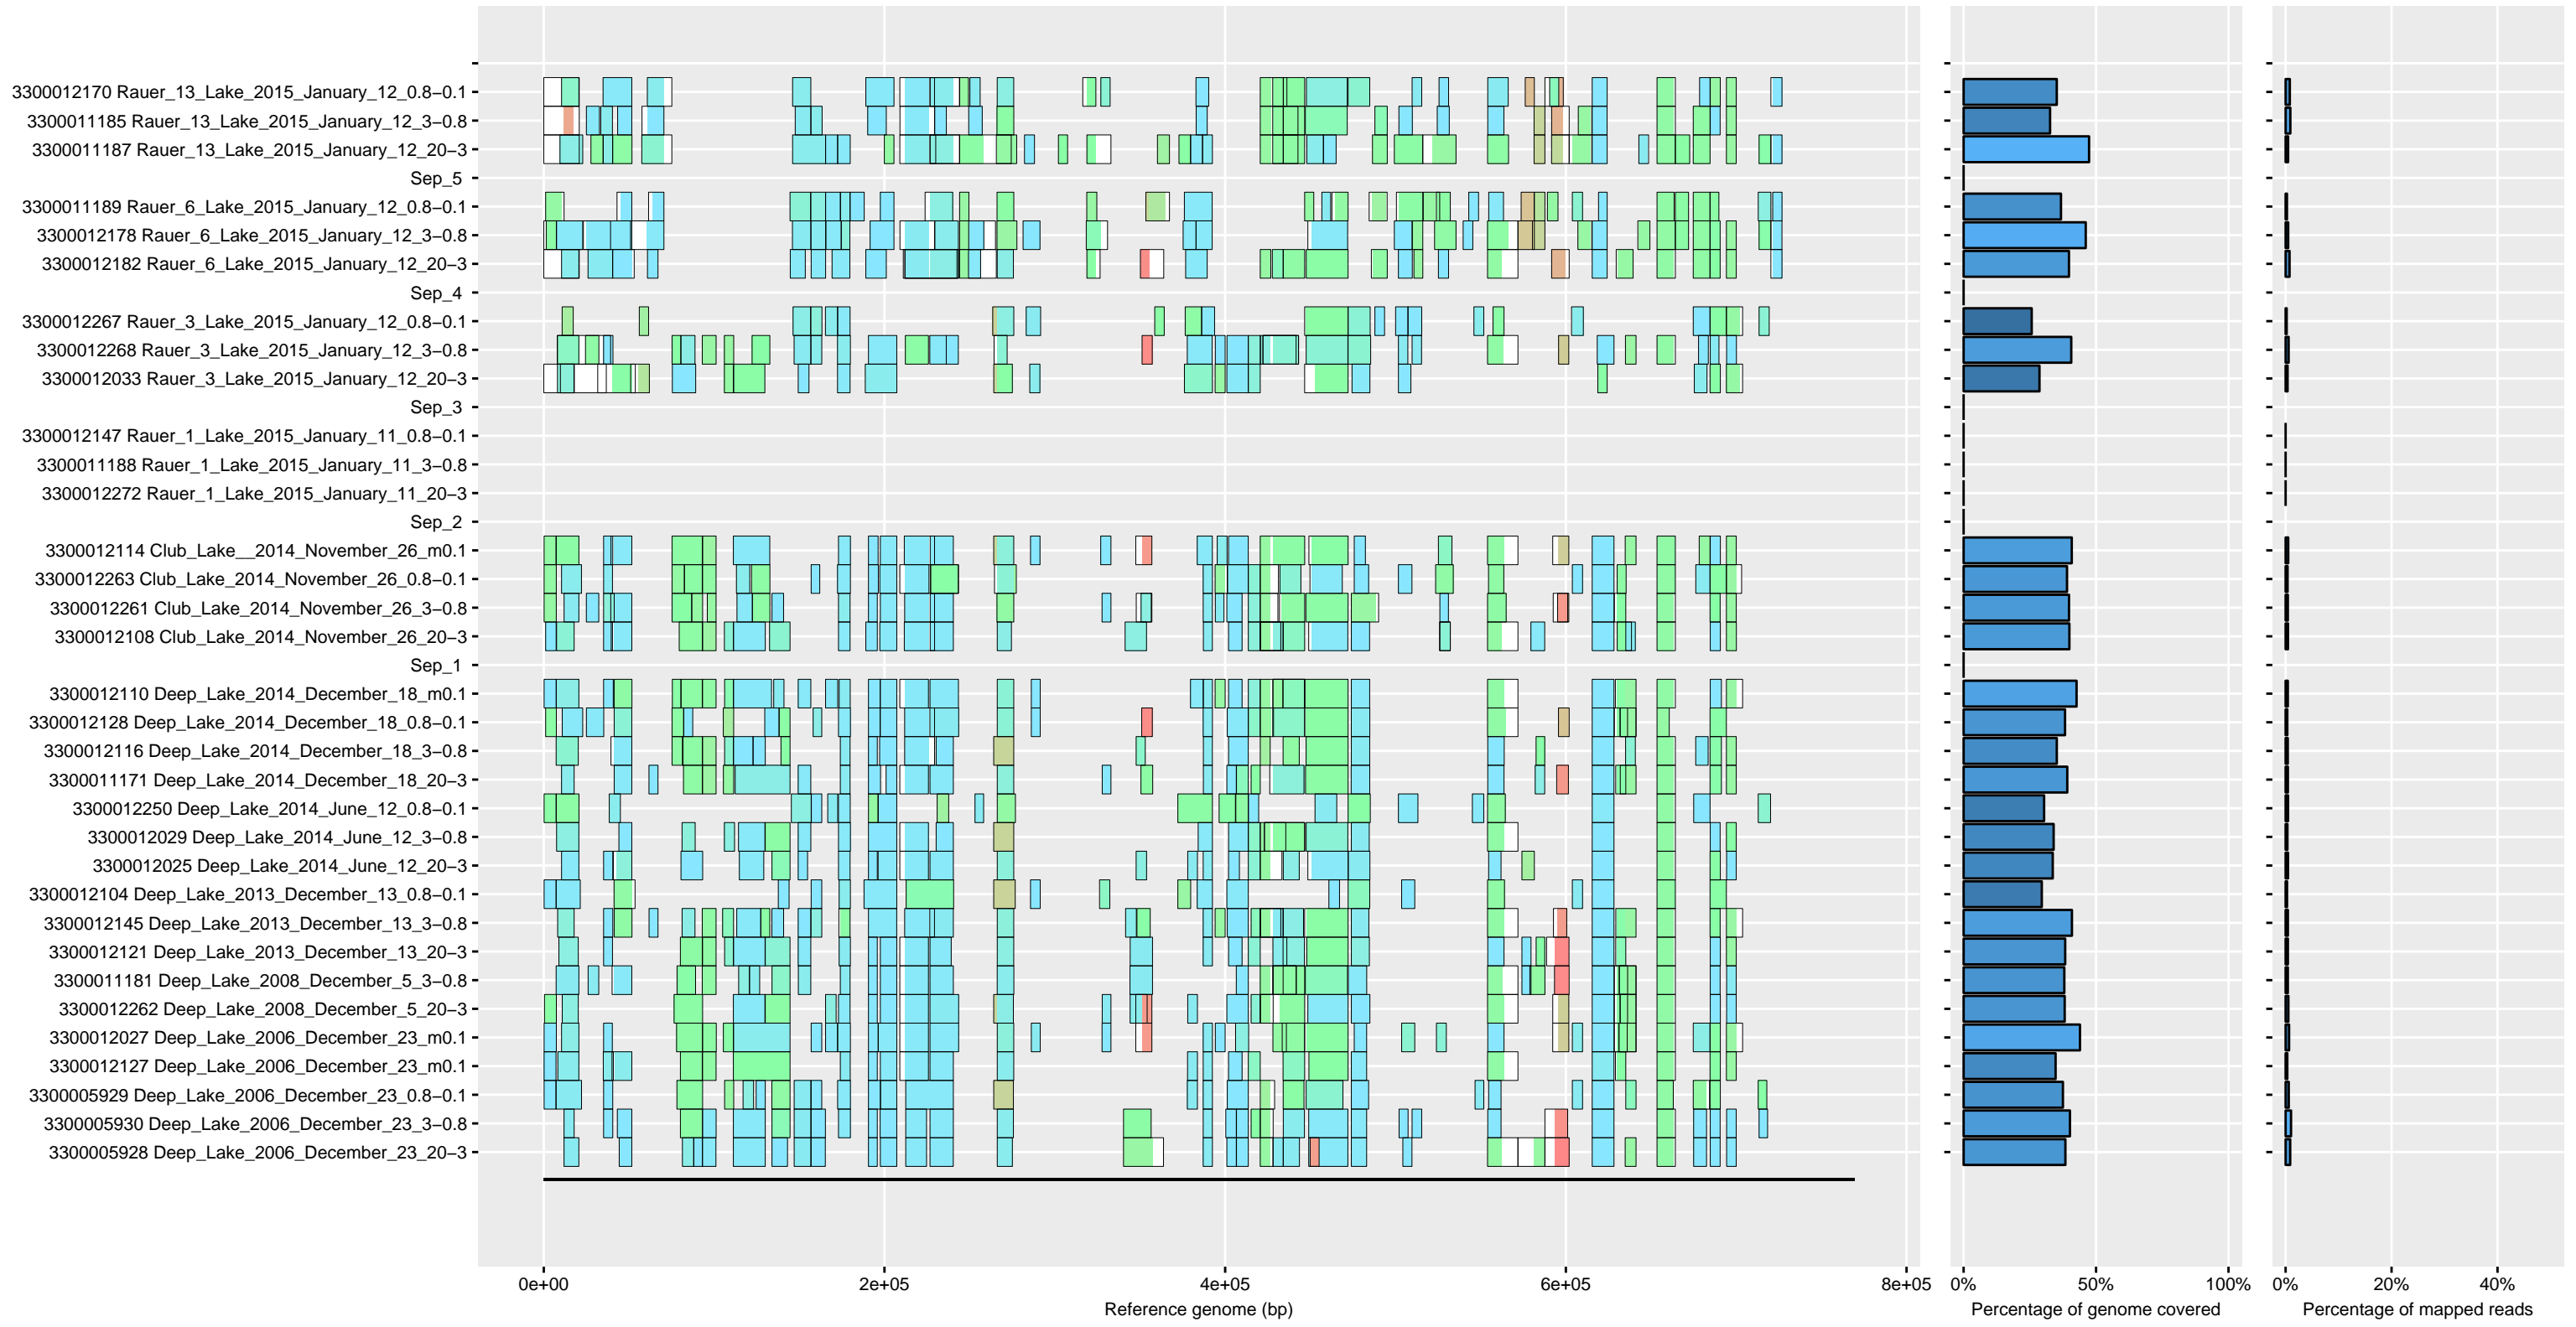

**Figure S7** Contigs assembled from metagenomes mapped to replicons. DL1 primary (**a**) and secondary (**b**) replicons; *Hht. litchfieldiae* tADL single replicon (**c**); DL31 primary (**d**) and secondary (**e, f**) replicons; *Hrr. lacusprofundi* ACAM34 primary (**g**) and secondary (**h, i**) replicons; *Hrr. lacusprofundi* R1S1 primary (**j**) and secondary (**k**) replicons. Note: the smallest replicon of DL31 (~24 kb) did not recruit any contigs (**f**); contigs for the R1S1 secondary replicons were concatenated (**k**).

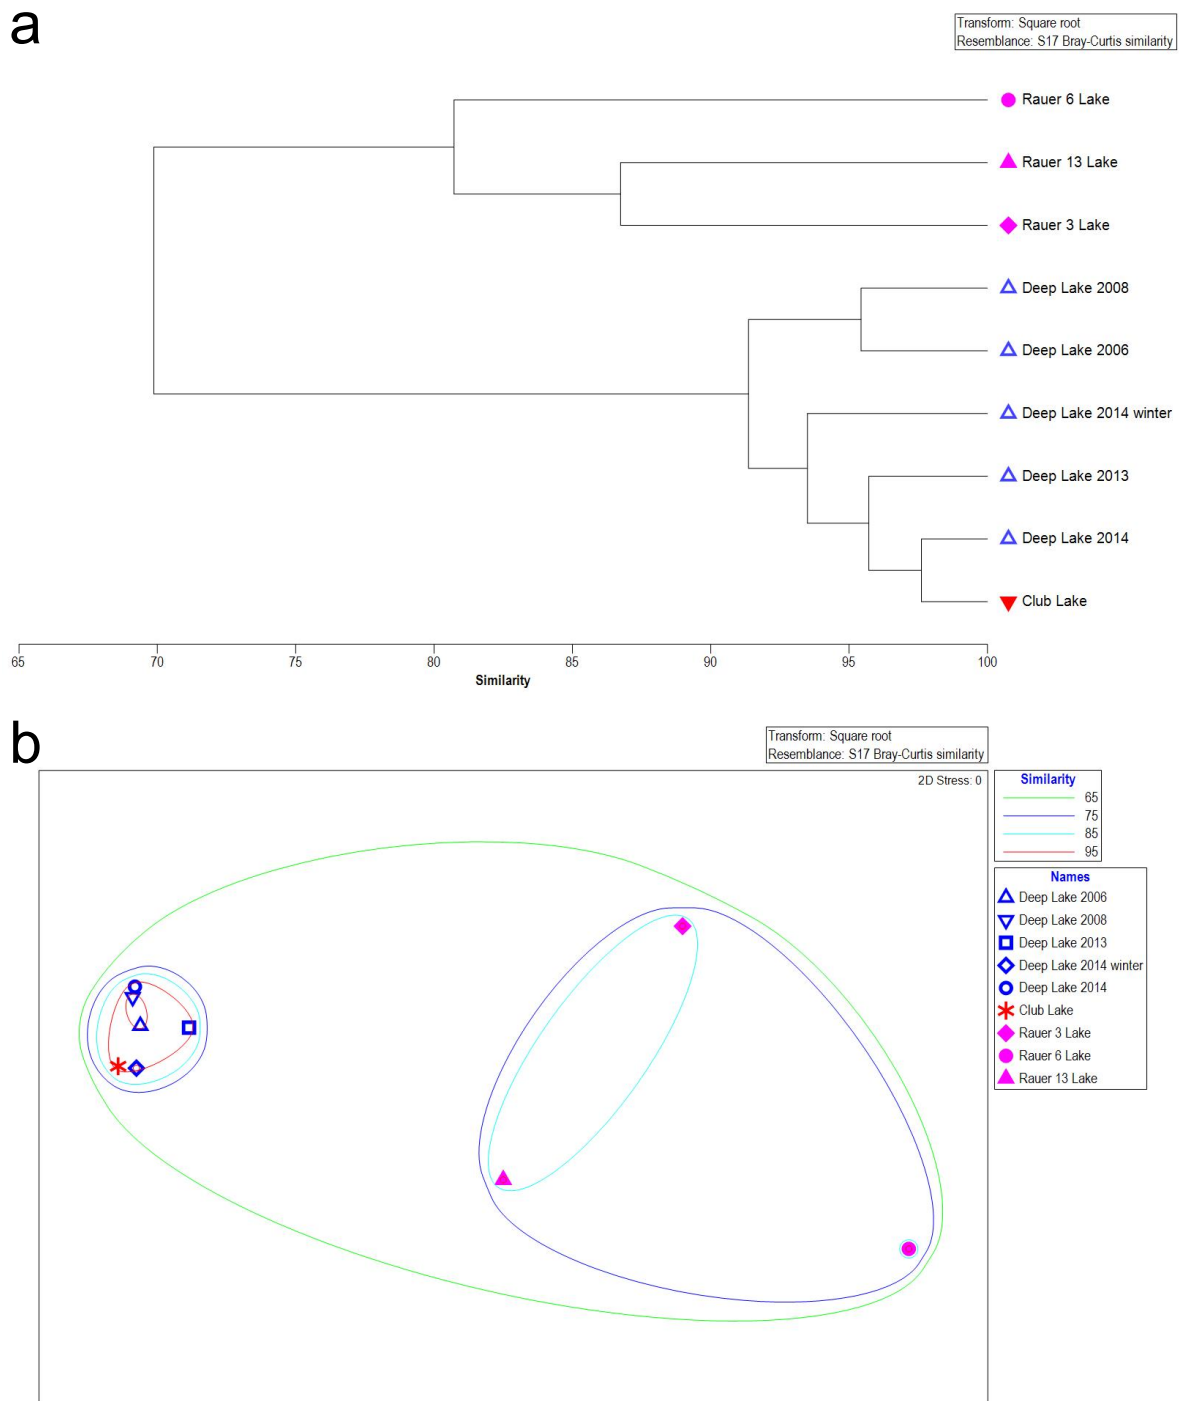

**Figure S8** Clustering and scaling of samples. **a** The dendrogram depicts the clustering of the relative species abundances of taxa in five samples from Deep Lake, one from Club Lake, and one sample each from lakes in the Rauer Islands (Rauer 3, 6 and 13). Abundances were obtained from the coverages of the metagenome contigs assigned to species level, and relative abundances calculated as percentages of the total species abundance for each sample (Additional file 2: Table S12). The data were square root transformed prior to UPGMA clustering of the samples. The x-axis denotes Bray-Curtis similarity. **b** Two-dimensional scaling of the samples from (a) based on Bray-Curtis similarity of the square root transformed data. The UPGMA cluster was overlaid on the nMDS plot, with similarity shown at 65, 75, 85, and 95%.

**Table S1** Description of the Rauer Islands and Vestfold Hills hypersaline lakes sampled in this study.

| <sup>1</sup> Sampling date  | <sup>2</sup> Water volume filtered (L) | <sup>3</sup> Sampling coordinates (degrees Lat Long) | <sup>4</sup> Unofficial names | <sup>5</sup> New unofficial names | <sup>5</sup> Antarctic Gazetteer name | <sup>4</sup> Depth max (m) | <sup>4</sup> Cond. (ms cm <sup>-1</sup> ) | <sup>6</sup> Cond. (ms cm <sup>-1</sup> ) | <sup>6</sup> Density (g 100 ml <sup>-1</sup> ) | <sup>6</sup> Temp. (°C) |
|-----------------------------|----------------------------------------|------------------------------------------------------|-------------------------------|-----------------------------------|---------------------------------------|----------------------------|-------------------------------------------|-------------------------------------------|------------------------------------------------|-------------------------|
| <b>Rauer Islands lakes</b>  |                                        |                                                      |                               |                                   |                                       |                            |                                           |                                           |                                                |                         |
| 11 Jan 2015 summer          | 50                                     | -68.8081667 77.8550500                               | Rauer 1 Lake                  |                                   |                                       | 7                          | 129                                       | 178                                       | 112.3                                          | 6                       |
| 11 Jan 2015 summer          | 50                                     | -68.8146667 77.8273333                               | Rauer 3 Lake                  |                                   | Cavities Lake                         | 2.5                        | 115                                       | 164                                       | 111.5                                          | 11                      |
| 11 Jan 2015 summer          | 50                                     | -68.8878333 77.8395000                               | Rauer 6 Lake                  |                                   |                                       | 1.5                        | 130                                       | 119                                       | 107.6                                          | 9                       |
| 11 Jan 2015 summer          | 50                                     | -68.8895000 77.8448333                               |                               | Rauer 13 Lake                     |                                       |                            |                                           | 180                                       | 113.7                                          | 9                       |
| <b>Vestfold Hills lakes</b> |                                        |                                                      |                               |                                   |                                       |                            |                                           |                                           |                                                |                         |
| 26 Nov 2014 'summer'        | 125 (265)                              | -68.5417333 78.2467667                               |                               |                                   | Club Lake                             | nd                         |                                           | 190                                       | 118.6                                          | nd                      |
| 23 Dec 2006 summer          | 55 (90)                                | -68.56276003 78.18827                                |                               |                                   | Deep Lake                             | 36                         |                                           | nd                                        | nd                                             | nd                      |
| 5 Dec 2008 summer           | 50                                     | -68.5573389 78.1868417                               |                               |                                   | Deep Lake                             | 36                         |                                           | nd                                        | nd                                             | nd                      |
| 13 Dec 2013 summer          | 50                                     | -68.5558667 78.1913917                               |                               |                                   | Deep Lake                             | 36                         |                                           | 205                                       | 117.0                                          | 4                       |
| 12 June 2014 winter         | 70                                     | -68.5558667 78.1913917                               |                               |                                   | Deep Lake                             | 36                         |                                           | 176                                       | nd                                             | nd                      |
| 18 Dec 2014 summer          | 100 (175)                              | -68.56276003 78.18827                                |                               |                                   | Deep Lake                             | 36                         |                                           | 192                                       | 117.1                                          | 2                       |

See Additional file 1 for a description (with photographs) of the 2013-2015 lake sampling expedition.

<sup>1</sup> In addition to precise dates of sampling, seasons are shown. Club Lake was sampled 26 Nov which is by definition of the austral seasons, the end of spring (shown as 'summer') – at this latitude, this date equates to 24 h sunlight.

<sup>2</sup> Volume of water from the lakes used for capturing biomass by sequential size filtration. Surface samples were taken, although note specific details for Rauer Island lakes in Additional file 1. Values in parentheses are the volumes of water concentrated by tangential flow filtration.

<sup>3</sup> Photographs of lakes and their satellite map locations are shown in Figure S1. A full description of the sampling sites including photos is provided in Additional file 1.

<sup>4</sup> For Rauer Islands lakes, data from Hodgson *et al.*, 2001 [5]. Lake names, depth and conductivity from this study are shown.

<sup>5</sup> Unnamed Rauer Islands lakes were provided an unofficial name by utilizing the naming system of Hodgson *et al.*, 2001 [5]. The unofficial names (Rauer 'number' Lake) are used exclusively in this study as only one Rauer Island lake has an official name listed in the Australian Antarctic Gazetteer (<https://data.aad.gov.au/aadc/gaz/>).

<sup>6</sup> Conductivity and temperature of the water at the time of sampling are shown. As an alternative measure of salinity, density is also shown. Density was recorded as the weight of 100 mL of water weighed in a volumetric flask using a fine (four place) balance at room temperature (20°C) standardized against 100 mL of deionised water. Temperature was measured with a glass thermometer; nd, not determined.



**Table S2** Antarctic lake metagenomes used in this study.

| Lake name     | Year | Month - Day               | Size fraction           | IMG genome ID | Gold Analysis Project ID | Assembled metagenome size (bp) |
|---------------|------|---------------------------|-------------------------|---------------|--------------------------|--------------------------------|
| Deep Lake     | 2006 | December 23 <sup>rd</sup> | 20 - 3 $\mu\text{m}$    | 3300005928    | Ga0075105                | 127444550                      |
| Deep Lake     | 2006 | December 23 <sup>rd</sup> | 3 - 0.8 $\mu\text{m}$   | 3300005930    | Ga0075106                | 188685715                      |
| Deep Lake     | 2006 | December 23 <sup>rd</sup> | 0.8 - 0.1 $\mu\text{m}$ | 3300005929    | Ga0075107                | 119306653                      |
| Deep Lake     | 2006 | December 23 <sup>rd</sup> | < 0.1 $\mu\text{m}$     | 3300012127    | Ga0136608                | 110118418                      |
| Deep Lake     | 2006 | December 23 <sup>rd</sup> | < 0.1 $\mu\text{m}$     | 3300012027    | Ga0136609                | 79462683                       |
| Deep Lake     | 2008 | December 5 <sup>th</sup>  | 20 - 3 $\mu\text{m}$    | 3300012262    | Ga0136606                | 86277388                       |
| Deep Lake     | 2008 | December 5 <sup>th</sup>  | 3 - 0.8 $\mu\text{m}$   | 3300011181    | Ga0136607                | 101045660                      |
| Deep Lake     | 2013 | December 13 <sup>th</sup> | 20 - 3 $\mu\text{m}$    | 3300012121    | Ga0136565                | 100145597                      |
| Deep Lake     | 2013 | December 13 <sup>th</sup> | 3 - 0.8 $\mu\text{m}$   | 3300012145    | Ga0136566                | 161744775                      |
| Deep Lake     | 2013 | December 13 <sup>th</sup> | 0.8 - 0.1 $\mu\text{m}$ | 3300012104    | Ga0136567                | 67783456                       |
| Deep Lake     | 2014 | June 12 <sup>th</sup>     | 20 - 3 $\mu\text{m}$    | 3300012025    | Ga0136571                | 73641348                       |
| Deep Lake     | 2014 | June 12 <sup>th</sup>     | 3 - 0.8 $\mu\text{m}$   | 3300012029    | Ga0136572                | 100880304                      |
| Deep Lake     | 2014 | June 12 <sup>th</sup>     | 0.8 - 0.1 $\mu\text{m}$ | 3300012250    | Ga0136573                | 60323580                       |
| Deep Lake     | 2014 | December 18 <sup>th</sup> | 20 - 3 $\mu\text{m}$    | 3300011171    | Ga0136580                | 70990421                       |
| Deep Lake     | 2014 | December 18 <sup>th</sup> | 3 - 0.8 $\mu\text{m}$   | 3300012116    | Ga0136581                | 88575811                       |
| Deep Lake     | 2014 | December 18 <sup>th</sup> | 0.8 - 0.1 $\mu\text{m}$ | 3300012128    | Ga0136582                | 107097935                      |
| Deep Lake     | 2014 | December 18 <sup>th</sup> | < 0.1 $\mu\text{m}$     | 3300012110    | Ga0136593                | 102592878                      |
| Club Lake     | 2014 | November 26 <sup>th</sup> | 20 - 3 $\mu\text{m}$    | 3300012108    | Ga0136562                | 83416154                       |
| Club Lake     | 2014 | November 26 <sup>th</sup> | 3 - 0.8 $\mu\text{m}$   | 3300012261    | Ga0136563                | 71167471                       |
| Club Lake     | 2014 | November 26 <sup>th</sup> | 0.8 - 0.1 $\mu\text{m}$ | 3300012263    | Ga0136564                | 86361097                       |
| Club Lake     | 2014 | November 26 <sup>th</sup> | < 0.1 $\mu\text{m}$     | 3300012114    | Ga0136595                | 84310686                       |
| Rauer 1 Lake  | 2015 | January 11 <sup>th</sup>  | 20 - 3 $\mu\text{m}$    | 3300012272    | Ga0136586                | 317629528                      |
| Rauer 1 Lake  | 2015 | January 11 <sup>th</sup>  | 3 - 0.8 $\mu\text{m}$   | 3300011188    | Ga0136587                | 339573373                      |
| Rauer 1 Lake  | 2015 | January 11 <sup>th</sup>  | 0.8 - 0.1 $\mu\text{m}$ | 3300012147    | Ga0136588                | 153987876                      |
| Rauer 3 Lake  | 2015 | January 12 <sup>th</sup>  | 20 - 3 $\mu\text{m}$    | 3300012033    | Ga0136589                | 282086351                      |
| Rauer 3 Lake  | 2015 | January 12 <sup>th</sup>  | 3 - 0.8 $\mu\text{m}$   | 3300012268    | Ga0136590                | 171063290                      |
| Rauer 3 Lake  | 2015 | January 12 <sup>th</sup>  | 0.8 - 0.1 $\mu\text{m}$ | 3300012267    | Ga0136591                | 157623777                      |
| Rauer 6 Lake  | 2015 | January 12 <sup>th</sup>  | 20 - 3 $\mu\text{m}$    | 3300012182    | Ga0136556                | 338478872                      |
| Rauer 6 Lake  | 2015 | January 12 <sup>th</sup>  | 3 - 0.8 $\mu\text{m}$   | 3300012178    | Ga0136557                | 319376726                      |
| Rauer 6 Lake  | 2015 | January 12 <sup>th</sup>  | 0.8 - 0.1 $\mu\text{m}$ | 3300011189    | Ga0136558                | 329351461                      |
| Rauer 13 Lake | 2015 | January 12 <sup>th</sup>  | 20 - 3 $\mu\text{m}$    | 3300011187    | Ga0136596                | 244559929                      |
| Rauer 13 Lake | 2015 | January 12 <sup>th</sup>  | 3 - 0.8 $\mu\text{m}$   | 3300011185    | Ga0136597                | 201429522                      |
| Rauer 13 Lake | 2015 | January 12 <sup>th</sup>  | 0.8 - 0.1 $\mu\text{m}$ | 3300012170    | Ga0136598                | 251362283                      |

**Table S3** Unique transposase genes of *Hrr. lacusprofundi* strains ACAM34 and R1S1.

| ACAM34            |              |                    | R1S1              |              |                   | Comments                                                                                                                                                                                              |
|-------------------|--------------|--------------------|-------------------|--------------|-------------------|-------------------------------------------------------------------------------------------------------------------------------------------------------------------------------------------------------|
| Position          | Length in bp | Locus tags         | Position          | Length in bp | Locus tags        |                                                                                                                                                                                                       |
| -                 | -            | -                  | 220497...221663   | 1167         | Ga0123509_160215  |                                                                                                                                                                                                       |
| 53104...54566     | 1463         | Hlac_0054          | -                 | -            | -                 |                                                                                                                                                                                                       |
| -                 | -            | -                  | 726583..727833    | 1251         | Ga0123509_160717  |                                                                                                                                                                                                       |
| 452870...454709   | 1840         | Hlac_0436/<br>0437 | -                 | -            | -                 |                                                                                                                                                                                                       |
| 597160...598692   | 1533         | Hlac_0580          | -                 | -            | -                 | Within a region of low similarity (Table S4)                                                                                                                                                          |
| -                 | -            | -                  | 914035...915183   | 1149         | Ga0123509_160913  |                                                                                                                                                                                                       |
| 919624...920622   | 999          | Hlac_0921          | -                 | -            | -                 |                                                                                                                                                                                                       |
| 1015778...1017239 | 1462         | Hlac_1024          | -                 | -            | -                 |                                                                                                                                                                                                       |
| -                 | -            | -                  | 1328455...1329885 | 1431         | Ga0123509_1601346 | This transposase gene lies within the ACAM34 gene Hlac_1071 (hypothetical with five-bladed $\beta$ -propellor domain found in some glycosyl hydrolases); within a region of low similarity (Table S4) |
| 1137543...1139396 | 1854         | Hlac_1128          | -                 | -            | -                 |                                                                                                                                                                                                       |
| 1222965...1223963 | 999          | Hlac_1212          | -                 | -            | -                 |                                                                                                                                                                                                       |
| -                 | -            | -                  | 1707365...1708804 | 1440         | Ga0123509_1601717 |                                                                                                                                                                                                       |
| 1501533...1502171 | 639          | Hlac_1494          | -                 | -            | -                 |                                                                                                                                                                                                       |
| 1525929...1526567 | 639          | Hlac_1512          | -                 | -            | -                 |                                                                                                                                                                                                       |
| -                 | -            | -                  | 1848367...1849545 | 1179         | Ga0123509_1601858 |                                                                                                                                                                                                       |
| 1625006...1626467 | 1462         | Hlac_1606          | -                 | -            | -                 |                                                                                                                                                                                                       |
| -                 | -            | -                  | 1918636...1919808 | 1173         | Ga0123509_1601929 |                                                                                                                                                                                                       |
| 1771722...1772970 | 1249         | Hlac_1756          | -                 | -            | -                 |                                                                                                                                                                                                       |
| 1772965...1774372 | 1408         | Hlac_1757          | -                 | -            | -                 |                                                                                                                                                                                                       |
| 1775301...1776702 | 1402         | Hlac_1759          | -                 | -            | -                 | This transposase gene lies within the R1S1 gene Ga0123509_1602045 which is annotated as putative replication initiator protein (rep)                                                                  |

|                   |      |           |                   |      |                               |                                                                                                                        |
|-------------------|------|-----------|-------------------|------|-------------------------------|------------------------------------------------------------------------------------------------------------------------|
| 1847940...1849401 | 1462 | Hlac 1840 | -                 | -    | -                             |                                                                                                                        |
|                   |      |           | 2257564...2258808 | 1245 | Ga0123509_1602307             | Within a region of low similarity (Table S4)                                                                           |
| 2082149...2083550 | 1402 | Hlac 2092 | -                 | -    | -                             |                                                                                                                        |
| 2238850...2240187 | 1338 | Hlac 2250 | -                 | -    | -                             |                                                                                                                        |
| -                 | -    | -         | 2581257...2582977 | 1721 | Ga0123509_1602633/<br>1602634 | This transposase gene lies within the ACAM34 gene Hlac_2333 which is annotated as an uncharacterised membrane protein. |

All transposase genes which are not present at the equivalent genomic position in the other strain are listed.

**Table S4** Unique protein-coding genes on *Hrr. lacusprofundi* ACAM 34 and R1S1 primary replicons.

| ACAM34            |              |                    | R1S1              |              |                   | Annotation and comments                                                                                                    |
|-------------------|--------------|--------------------|-------------------|--------------|-------------------|----------------------------------------------------------------------------------------------------------------------------|
| Position          | Length in bp | Locus tags         | Position          | Length in bp | Locus tags        |                                                                                                                            |
| -                 | -            | -                  | 85713...86333     | 620          | Ga0123509_16091   | Two consecutive archaellin genes ( <i>flaB</i> ) in R1S1 where ACAM34 has only one archaellin gene                         |
| -                 | -            | -                  | 782723...783296   | 574          | Ga0123509_160778  | Putative cell surface protein, absent in ACAM34                                                                            |
| 605333...606991   | 1659         | Hlac_0587          | -                 | -            | -                 | $\alpha$ -amylase, absent in R1S1                                                                                          |
| 750801...779997   | 29197        | Hlac_0736 to 0775  | 1038242...1039459 | 1217         | Ga0123509_1601043 | Provirus Hlac-Pro1 in ACAM34. R1S1 contains a gene encoding for a putative cell surface protein at the equivalent location |
| 1057147...1057488 | 342          | Hlac_1060          | -                 | -            | -                 | Protein with ArsR-like helix-turn-helix (DNA-binding) domain, absent in R1S1; within a region of low similarity (Table S6) |
| 1081868...1082583 | 716          | Hlac_1081/1082     | -                 | -            | -                 | Putative toxin-antitoxin (TA) system, absent in R1S1                                                                       |
| 1972868...1973351 | 484          | Hlac_1975 (partly) | -                 | -            | -                 | Part of hypothetical protein and intergenic region, absent in R1S1                                                         |

Eight protein-coding genes in seven distinct genomic loci on the primary replicons were identified as unique to either ACAM34 or R1S1.

**Table S5** Unique sequence duplications and non-coding RNAs on the R1S1 primary replicon.

| <b>Position</b>                 | <b>Length in bp</b> | <b>Locus tags</b>          | <b>Comments and annotation</b>                                                                                                       |
|---------------------------------|---------------------|----------------------------|--------------------------------------------------------------------------------------------------------------------------------------|
| 75437...76027 and 76016...76606 | 591                 | Ga0123509_16078 to 16081   | Duplication of 591 nt in R1S1; affected ORFs are annotated as ERCC domain protein and hypothetical proteins                          |
| 403081...403459                 | 379                 | Ga0123509_160398 to 160401 | Four identical tRNA-Asp copies side by side in R1S1; only two copies in ACAM34                                                       |
| 1169239...1169367               | 128                 | Ga0123509_1601183          | HgcC family ncRNA, absent in ACAM34                                                                                                  |
| 2581257...2582977               | 1721                | Ga0123509_1602632          | HgcC family ncRNA. Adjacent to the ncRNA are two transposase genes which are absent in ACAM34 (Ga0123509_1602633/ 1602634; Table S3) |

These types of unique sequences were not identified on the ACAM34 primary replicon.

**Table S6** Regions with low sequence similarity between ACAM34 and R1S1 primary replicons.

| # | ACAM34              |                                  | R1S1                |                                               | ID  | Comments and annotation of encoded genes                                                                                                                                                                                                                                                                                                                                                                                    |
|---|---------------------|----------------------------------|---------------------|-----------------------------------------------|-----|-----------------------------------------------------------------------------------------------------------------------------------------------------------------------------------------------------------------------------------------------------------------------------------------------------------------------------------------------------------------------------------------------------------------------------|
|   | Position            | Locus tags                       | Position            | Locus tags                                    |     |                                                                                                                                                                                                                                                                                                                                                                                                                             |
| 1 | 114519<br>...123903 | Hlac_0109<br>to 0118             | 403285<br>...412681 | Ga0123509<br>_160402 to<br>1060413            | 95% | Acetoin utilization deacetylase AcuC; archaeal histone-like protein; replication factor A1; tRNA-Arg; sodium/proton antiporter, CPA1 family (TC2.A.36); NAD <sup>+</sup> dependent glucose-6-phosphate dehydrogenase; putative cell surface protein (cytoplasmic, transmembrane and non-cytoplasmic domains); hypothetical (DUF309 domain); hypothetical (uncharacterized protein family SepF-related domain); hypothetical |
| 2 | 426616<br>...428965 | Hlac_0409<br>(partly) to<br>0411 | 715497<br>...717777 | Ga0123509<br>_160708<br>(partly) to<br>160710 | 93% | Hypothetical (WD40/YVTN repeat-like-containing domain, oligoxyloglucan reducing end-specific cellobiohydrolase superfamily); integral membrane protein-like protein; putative transcription regulator, CopG/Arc/MetJ family                                                                                                                                                                                                 |
|   | 428966...<br>432296 | Hlac_0412                        | 717778<br>...720739 | Ga0123509<br>160711                           | 54% | S-layer glycoprotein                                                                                                                                                                                                                                                                                                                                                                                                        |
| 3 | 596866<br>...597159 | Hlac_0579                        | 885886<br>...886179 | Ga0123509<br>160884                           | 93% | Hypothetical (multiple transmembrane and non-cytoplasmic domains)                                                                                                                                                                                                                                                                                                                                                           |
|   | 597160<br>...598692 | Hlac_0580                        | -                   | -                                             | -   | Transposase gene, absent in R1S1                                                                                                                                                                                                                                                                                                                                                                                            |
|   | 598833<br>...605292 | Hlac_0581<br>to 0586             | 886275<br>...892719 | Ga0123509<br>_160885 to<br>160891             | 89% | Dipeptidyl aminopeptidase/acylaminoacyl peptidase; glycosyltransferase; halocyanin domain-containing protein; phosphoribosyltransferase; MoxR-like ATPase; tRNA <sub>Ser</sub> ; hypothetical                                                                                                                                                                                                                               |



|   |                       |                      |                       |                                     |     |                                                                                                                                                                                                                                                                                                                                                                                        |
|---|-----------------------|----------------------|-----------------------|-------------------------------------|-----|----------------------------------------------------------------------------------------------------------------------------------------------------------------------------------------------------------------------------------------------------------------------------------------------------------------------------------------------------------------------------------------|
| 4 | 1045360<br>...1056892 | Hlac_1051<br>to 1059 | 1302658<br>...1314181 | Ga0123509<br>_1601325<br>to 1601334 | 93% | Xaa-Pro aminopeptidase; phosphoglycerate dehydrogenase; amidohydrolase; 4-aminobutyrate aminotransferase; choline/carnitine/betaine transport; amidohydrolase; alcohol dehydrogenase zinc-binding domain protein; capsule biosynthesis protein; hypothetical                                                                                                                           |
|   | 1057147<br>...1057488 | Hlac_1060            | -                     | -                                   | -   | Hypothetical protein, absent in R1S1;                                                                                                                                                                                                                                                                                                                                                  |
|   | 1057665<br>...1071621 | Hlac_1061<br>to 1071 | 1314574<br>...1328460 | Ga0123509<br>_1601335<br>to 1601345 | 95% | Putative membrane protein; oligosaccharyltransferase STT3 subunit AglB; glycosyl transferase family 2; glycosyl transferase group 1; sulfatase; glycosyl transferase group 1; hypothetical (alkaline-phosphatase-like core domain); polysaccharide biosynthesis protein; formyl transferase; hypothetical with five-bladed $\beta$ -propellor domain found in some glycosyl hydrolases |
|   | -                     | -                    | 1328455<br>...1329885 | Ga0123509<br>_1601346               | -   | Transposase gene, absent in ACAM34                                                                                                                                                                                                                                                                                                                                                     |
|   | 1071622<br>...1081793 | Hlac_1072<br>to 1080 | 1329886<br>...1340080 | Ga0123509<br>_1601347<br>to 1601355 | 95% | NAD-dependent epimerase/dehydratase; NAD-dependent epimerase/dehydratase; UDP-sulfoquinovose synthase; transcriptional regulator TrmB; hypothetical; ORC complex protein Cdc6/Orc1; glutamine--fructose-6-phosphate transaminase; nucleotidyl transferase; hypothetical                                                                                                                |
| 5 | 1999910<br>...2007189 | Hlac_2006<br>to 2013 | 2249787<br>...2257210 | Ga0123509<br>_1602299<br>to 1602306 | 91% | Membrane protein involved in the export of O-antigen and teichoic acid; transcriptional regulator, TetR family; succinylglutamate desuccinylase; arginine decarboxylase; proteasome-activating nucleotidase; response regulator receiver protein; hypothetical                                                                                                                         |
|   | -                     | -                    | 2257564<br>...2258808 | Ga0123509<br>_1602307               | -   | Transposase gene, absent in ACAM34                                                                                                                                                                                                                                                                                                                                                     |
|   | 2007190<br>...2008357 | Hlac_2014            | 2258824<br>...2259992 | Ga0123509<br>_1602308               | 95% | Peptidase M29 aminopeptidase I                                                                                                                                                                                                                                                                                                                                                         |

Annotations are from IMG.

**Table S7** New HIRs identified in R1S1.

| HIR length (bp) | ID (%)       | R1S1 contig          | start       | end         | DL species/replicon                                            | start          | end            |
|-----------------|--------------|----------------------|-------------|-------------|----------------------------------------------------------------|----------------|----------------|
| 13970           | 99.87        | Ga0123509_141        | 127         | 14096       | DL1/HalDL1_Contig37 (secondary replicon)                       | 278097         | 264129         |
| 9603            | 100          | Ga0123509_133        | 1           | 9603        | DL31/DL31_replicon 2 (secondary replicon)                      | 101664         | 111266         |
| 9388            | 99.93        | Ga0123509_155        | 22279       | 31666       | DL1/HalDL1_Contig37 (secondary replicon)                       | 16880          | 7493           |
| 6021            | 100          | Ga0123509_135        | 58          | 6078        | DL31/DL31_replicon 2 (secondary replicon)                      | 363470         | 357450         |
| 4800            | 99.98        | Ga0123509_151        | 21705       | 26504       | DL31/DL31_replicon 2 (secondary replicon)                      | 451899         | 456698         |
| 4386            | 100          | Ga0123509_137        | 3750        | 8135        | <i>Hht. litchfieldiae</i> tADL/Hlit_replicon (single replicon) | 1224426        | 1220041        |
| 4302            | 100          | Ga0123509_154        | 263         | 4564        | DL1/HalDL1_Contig37 (secondary replicon)                       | 97783          | 102084         |
| 4225            | 99.95        | Ga0123509_135        | 6073        | 10297       | DL31/DL31_replicon 2 (secondary replicon)                      | 297162         | 292938         |
| 4064            | 99.98        | Ga0123509_137        | 8125        | 12188       | <i>Hht. litchfieldiae</i> tADL/Hlit_replicon (single replicon) | 1504145        | 1508208        |
| <i>3694</i>     | <i>99.89</i> | <i>Ga0123509_141</i> | <i>1501</i> | <i>5194</i> | <i>Hht. litchfieldiae</i> tADL/Hlit_replicon (single replicon) | <i>1483561</i> | <i>1479868</i> |
| 3469            | 99.94        | Ga0123509_145        | 10141       | 13609       | DL1/HalDL1_Contig37 (secondary replicon)                       | 250326         | 246858         |
| 2330            | 100          | Ga0123509_120        | 1           | 2330        | DL31/DL31_replicon 2 (secondary replicon)                      | 679626         | 677297         |

HIRs shared between the R1S1 secondary replicon contigs and *Hht. litchfieldiae* tADL, DL31 or DL1. The region highlighted in italics is part of the 14 kb HIR shared between R1S1 and DL1. Contig and replicon names are from IMG.

**Table S8** HIR conserved between *Hrr. lacusprofundi* R1S1 and DL1 that encodes a type I-B CRISPR system.

|               | <i>Hrr. lacusprofundi</i> R1S1 | DL1                           | ID    |
|---------------|--------------------------------|-------------------------------|-------|
| <b>Cas6</b>   | Ga0123509 15595                | HalDL1 3060                   | 100%  |
| <b>Cas8b</b>  | Ga0123509 15594                | HalDL1 3061                   | 100%  |
| <b>Cas7</b>   | Ga0123509 15593                | HalDL1 3062                   | 100%  |
| <b>Cas5h</b>  | Ga0123509 15592                | HalDL1 3063                   | 100%  |
| <b>Cas3</b>   | Ga0123509 15591                | HalDL1 3064                   | 99.8% |
| <b>Cas4</b>   | Ga0123509 15590                | HalDL1 3065                   | 99.5% |
| <b>Cas1</b>   | Ga0123509 15589                | HalDL1 3066                   | 100%  |
| <b>Cas2</b>   | Ga0123509 15588                | HalDL1 3067                   | 100%  |
| <b>Repeat</b> | ACTTCAACCCACGAGGGTACGTCTGAAAC  | ACTTCAACCCACGAGGGTACGTCTGAAAC | 100%  |

The table lists the Cas protein names, the corresponding IMG locus tags for R1S1 and DL1, and the CRISPR repeat sequences. ID refers to amino acid identity for Cas proteins and nucleotide identity for spacer sequences.

**Table S9** R1S1 CRISPR spacer matching Hlac-Pro1 in ACAM34.

|                                     | R1S1                                                            |               | ACAM34                               |                                                                                                                   |
|-------------------------------------|-----------------------------------------------------------------|---------------|--------------------------------------|-------------------------------------------------------------------------------------------------------------------|
|                                     | Coordinates                                                     | Annotation    | Coordinates                          | Annotation                                                                                                        |
| CTCAACATCCCCGCAGGGTGACCTGGCCTTCCGGA | 20539...20573;<br>secondary replicon<br>contig<br>Ga0123509_155 | CRISPR spacer | 756383...756349;<br>primary replicon | Part of Hlac-Pro1:<br>intergenic region<br>between<br>Hlac_R0018<br>(tRNA_Phe) and<br>Hlac_0748<br>(hypothetical) |

**Table S10** Presence of 16S rRNA gene sequences for known Antarctic haloarchaeal species in Antarctic hypersaline lakes.

|               | <i>Hrr. lacusprofundi</i> | <i>Hht. litchfieldiae</i> | <b>DL31</b> | <b>DL1</b> |
|---------------|---------------------------|---------------------------|-------------|------------|
| Deep Lake     | yes                       | yes                       | yes         | yes        |
| Club Lake     | yes                       | yes                       | yes         | yes        |
| Rauer 1 Lake  | no                        | no                        | no          | no         |
| Rauer 3 Lake  | yes                       | yes                       | yes         | yes        |
| Rauer 6 Lake  | yes                       | yes                       | yes         | no         |
| Rauer 13 Lake | yes                       | yes                       | yes         | yes        |

Presence (yes) or absence (no) of 16S rRNA genes sequences in the metagenomes of the six lakes studied, determined using BLAST.

**Table S11** Relative abundance of *Hrr. lacusprofundi* ACAM34, *Hht. litchfieldiae* tADL, DL31 and DL1 in Antarctic lake metagenomes.

|                       | <i>Hrr. lacusprofundi</i><br>ACAM34 | <i>Hht. litchfieldiae</i><br>tADL | DL31      | DL1      |
|-----------------------|-------------------------------------|-----------------------------------|-----------|----------|
| Deep Lake 2014        | 9 (227)                             | 63 (1555)                         | 27 (662)  | 0.5 (13) |
| Deep Lake 2008        | 10 (108)                            | 53 (570)                          | 36 (388)  | 0.8 (9)  |
| Deep Lake 2013        | 10 (167)                            | 67 (1118)                         | 22 (371)  | 0.6 (10) |
| Club Lake             | 10 (241)                            | 62 (1426)                         | 27 (632)  | 0.8 (19) |
| Deep Lake 2006        | 11 (527)                            | 59 (2760)                         | 29 (1343) | 0.6 (28) |
| Deep Lake 2014 winter | 13 (191)                            | 63 (920)                          | 24 (346)  | 0.7 (11) |
| Rauer 3 Lake          | 22 (56)                             | 53 (135)                          | 22 (56)   | 4 (10)   |
| Rauer 13 Lake         | 43 (251)                            | 32 (185)                          | 25 (146)  | 0.5 (3)  |
| Rauer 6 Lake          | 47 (107)                            | 12 (28)                           | 40 (91)   | 0.9 (2)  |

Relative abundance is shown as a percentage of the median coverage values (shown in parentheses) of metagenome reads mapped onto the primary replicons.



**Table S12** Relative abundance of lake taxa assessed from read coverage and taxonomic assignment of contigs assembled from metagenome data.

|                       | <i>Halohasta litchfieldiae</i> | <i>Halorubrum lacusprofundi</i> | DL31 | DL1 | Other archaea | Bacteria | Eucarya | Viruses |
|-----------------------|--------------------------------|---------------------------------|------|-----|---------------|----------|---------|---------|
| Deep Lake 2006        | 45                             | 11                              | 27   | 0.5 | 9             | 3        | 0.5     | 4       |
| Deep Lake 2008        | 36                             | 14                              | 29   | 1   | 11            | 3        | 0.5     | 4       |
| Deep Lake 2013        | 45                             | 13                              | 13   | 0.7 | 17            | 3        | 0.5     | 7       |
| Deep Lake 2014 winter | 38                             | 10                              | 14   | 0.7 | 24            | 3        | 0.1     | 10      |
| Deep Lake 2014        | 44                             | 12                              | 20   | 0.7 | 15            | 2        | 0.4     | 6       |
| Club Lake 2014        | 44                             | 11                              | 18   | 0.7 | 19            | 2        | 0.2     | 6       |
| Rauer 1 Lake 2015     | 0                              | 0                               | 0    | 0   | 0             | 66       | 10      | 24      |
| Rauer 3 Lake 2015     | 19                             | 12                              | 8    | 3   | 5             | 42       | 8       | 4       |
| Rauer 6 Lake 2015     | 3                              | 3                               | 9    | 0.3 | 3             | 66       | 5       | 10      |
| Rauer 13 Lake 2015    | 16                             | 9                               | 13   | 0.6 | 14            | 35       | 3       | 10      |

Abundances were obtained from the coverages of the metagenome contigs assigned to species level, and relative abundances shown as percentages of the total species abundance for each sample.

**Table S13** Genome coverage and percent identity for contigs mapped to replicons of *Hrr. lacusprofundi* R1S1 and ACAM34, *Hht. litchfieldiae* tADL, DL31 and DL1.

|                                         |                                | % of genome covered by contigs (hits of $\geq 5$ kb) | Average percentage of identity of hits |
|-----------------------------------------|--------------------------------|------------------------------------------------------|----------------------------------------|
| <b><i>Hrr. lacusprofundi</i> ACAM34</b> | <b>Primary NC 012029</b>       | <b>82</b>                                            | <b>99.4</b>                            |
|                                         | Secondary NC 012028            | 27                                                   | 99.7                                   |
|                                         | Secondary NC 012030            | 33                                                   | 99.8                                   |
| <b><i>Hrr. lacusprofundi</i> R1S1</b>   | <b>Primary Ga0123509_160</b>   | <b>84</b>                                            | <b>99.3</b>                            |
|                                         | Secondary contigs              | 48                                                   | 99.6                                   |
| <b><i>Hht. litchfieldiae</i> tADL</b>   | <b>Primary Contig32</b>        | <b>44</b>                                            | <b>97.9</b>                            |
| <b>DL31</b>                             | <b>Primary Contig115</b>       | <b>56</b>                                            | <b>99.6</b>                            |
|                                         | Secondary Contig113            | 0                                                    | -                                      |
|                                         | Secondary Contig114            | 32                                                   | 99.8                                   |
| <b>DL1</b>                              | <b>Primary HalDL1 Contig38</b> | <b>2.7</b>                                           | <b>98.1</b>                            |
|                                         | Secondary HalDL1 Contig37      | 18                                                   | 97.8                                   |

## References

1. McWilliam H, Li W, Uludag M, Squizzato S, Park YM, Buso N et al. Analysis tool web services from the EMBL-EBI. *Nucleic Acids Res.* 2013;41:W597-600.
2. DeMaere MZ, Williams TJ, Allen MA, Brown MV, Gibson JA, Rich J et al. High level of intergenera gene exchange shapes the evolution of haloarchaea in an isolated Antarctic lake. *Proc Natl Acad Sci U S A.* 2013;110:16939–16944.
3. Hodgson DA, Vyverman W, Sabbe K. Limnology and biology of saline lakes in the Rauer Islands, eastern Antarctica. *Antarctic Sci.* 2001;13:255-270.
